# Supplementary material
Source: publisher site journal article supplement (https://www.spandidos-publications.com/5958/downloadSupplementary)
Supplement: Supplementary file 1 [file downloadSupplementary]

## Sheet: Table S3
Table SIII. Results of the mRNA expression profiles between control and ITGB4-knocked down A549 cells.
Row-names	Symbol	sh-NC___log2FoldChange	sh-NC___padj	data	NC_1	NC_2	sh_1	sh_2
ENSG00000135624	CCT7;CCT7	-3.76062	1.88e-94		12.4033	12.5923	8.66493	8.83592	-93.7258
ENSG00000132470	ITGB4;ITGB4	-2.86844	8.34e-42		11.1795	10.82	8.20763	8.11091	-41.0788
ENSG00000067167	TRAM1;TRAM1	-2.46376	1.03e-36		12.1405	12.3754	9.6578	9.9375	-35.9872
ENSG00000259803	SLC22A31;SLC22A31	-3.00715	4.36e-27		9.04306	9.39023	6.4312	6.12018	-26.3605
ENSG00000136270	TBRG4;TBRG4	-2.12313	1.19e-24		10.5156	10.6022	8.55583	8.33286	-23.9245
ENSG00000171863	RPS7;RPS7	-2.10705	2.9e-23		13.9799	14.488	12.042	12.2507	-22.5376
ENSG00000213002	NA	-2.81334	7.98e-22		9.73567	10.4091	6.98917	7.60525	-21.098
ENSG00000128965	CHAC1;CHAC1	-2.03849	9.44e-19		9.79615	9.6316	7.75307	7.64261	-18.025
ENSG00000160803	UBQLN4;UBQLN4	-1.9451	1.14e-18		10.2183	9.97597	8.15603	8.18875	-17.9431
ENSG00000226525	RPS7P10;	-2.75287	1.27e-18		8.37712	8.7325	5.96175	5.82752	-17.8962
ENSG00000161513	FDXR;FDXR	-2.04966	1.79e-17		9.62958	9.8038	7.84116	7.52082	-16.7471
ENSG00000183291	SELENOF;SELENOF	-1.76624	2.82e-17		10.7274	10.8689	8.89783	9.17245	-16.5498
ENSG00000102158	MAGT1;MAGT1	-1.7306	8.37e-17		11.2541	11.3119	9.73016	9.36171	-16.0773
ENSG00000068120	COASY;COASY	-1.76495	1.43e-16		10.0139	10.1116	8.31287	8.30981	-15.8447
ENSG00000263266	RPS7P1;	-1.72346	2.19e-15		10.672	10.951	9.23083	8.9595	-14.6596
ENSG00000173221	GLRX;GLRX	-1.8636	2.46e-15		9.44596	9.58214	7.64781	7.6969	-14.6091
ENSG00000100300	TSPO;TSPO	-1.65928	2.91e-15		11.1652	11.3504	9.7637	9.42919	-14.5361
ENSG00000116521	SCAMP3;SCAMP3	-1.63112	3.59e-15		10.6342	10.6982	9.16005	8.91439	-14.4449
ENSG00000213326	RPS7P11;	-2.17716	4.5e-15		8.7653	9.01757	6.65358	6.8628	-14.3468
ENSG00000052802	MSMO1;MSMO1	-1.7022	4.5e-15		10.4071	10.7407	8.85615	8.922	-14.3468
ENSG00000012660	ELOVL5;ELOVL5	-1.65155	6.6e-15		10.0731	10.1558	8.46088	8.48802	-14.1805
ENSG00000175274	TP53I11;TP53I11	-1.81168	6.68e-15		9.93205	9.69279	8.1067	7.93134	-14.1752
ENSG00000109107	ALDOC;ALDOC	-3.16448	1.59e-14		7.91429	7.92668	4.37702	5.34381	-13.7986
ENSG00000143819	EPHX1;EPHX1	-1.46267	5.09e-14		11.8773	12.0193	10.6047	10.3648	-13.2933
ENSG00000130707	ASS1;ASS1	-1.56189	7.89e-14		10.3145	10.4064	8.87836	8.73286	-13.1029
ENSG00000211459	MT-RNR1;	-1.33767	9.03e-14		14.1298	14.1165	12.6808	12.8841	-13.0443
ENSG00000090487	SPG21;SPG21	-1.48131	1.11e-13		10.9517	11.1748	9.58613	9.59561	-12.9547
ENSG00000106541	AGR2;AGR2	-1.4407	1.27e-13		12.068	12.3262	10.6889	10.8359	-12.8962
ENSG00000136247	ZDHHC4;ZDHHC4	-1.67388	1.29e-13		9.84706	10.1232	8.33803	8.32138	-12.8894
ENSG00000162878	PKDCC;PKDCC	-1.66674	1.29e-13		10.3389	10.2048	8.7769	8.43577	-12.8894
ENSG00000145920	CPLX2;CPLX2	-1.58961	2.55e-13		11.3296	11.1451	9.44276	9.84169	-12.5935
ENSG00000185033	SEMA4B;SEMA4B	-1.40175	6.93e-13		11.4644	11.3119	10.0675	9.91222	-12.1593
ENSG00000123416	TUBA1B;TUBA1B	-1.27894	1.44e-12		12.4214	12.5405	11.2115	11.1977	-11.8416
ENSG00000123349	PFDN5;PFDN5	-1.37939	1.73e-12		11.4207	11.6412	10.2018	10.1141	-11.762
ENSG00000230176	LINC01433;	-2.7819	1.29e-11		7.4138	7.60691	4.88593	4.92572	-10.8894
ENSG00000088002	SULT2B1;SULT2B1	-1.6429	1.57e-11		9.34836	9.24948	7.72065	7.63027	-10.8041
ENSG00000117543	DPH5;DPH5	-1.60311	2.29e-11		9.60865	9.87202	8.26496	8.038	-10.6402
ENSG00000132824	SERINC3;SERINC3	-1.32334	2.29e-11		10.9164	10.9768	9.55582	9.69676	-10.6402
ENSG00000176153	GPX2;GPX2	-1.65288	2.37e-11		10.7255	10.7524	8.74502	9.37472	-10.6253
ENSG00000182606	TRAK1;TRAK1	-1.86067	2.42e-11		9.03994	8.78756	6.93367	7.23309	-10.6162
ENSG00000119729	RHOQ;HEL-S-42	-1.54868	2.88e-11		9.7943	9.89728	8.15603	8.44989	-10.5406
ENSG00000160326	SLC2A6;SLC2A6	-1.73106	2.96e-11		9.49239	9.60826	8.06427	7.5669	-10.5287
ENSG00000258017	;	-1.30044	2.96e-11		12.1625	12.4446	10.9651	11.0566	-10.5287
ENSG00000134375	TIMM17A;TIMM17A	-1.49538	4.51e-11		9.9571	10.2295	8.53111	8.69187	-10.3458
ENSG00000138131	LOXL4;LOXL4	-3.74098	4.63e-11		6.76727	7.02262	3.84666	3.43448	-10.3344
ENSG00000129480	DTD2;DTD2	-2.25879	4.95e-11		8.00676	8.54364	6.24618	5.95179	-10.3054
ENSG00000136840	ST6GALNAC4;ST6GALNAC4	-1.4011	5.54e-11		10.2592	10.4854	9.00716	8.95703	-10.2565
ENSG00000198715	GLMP;GLMP	-1.38064	7.71e-11		10.3678	10.1986	8.93363	8.89129	-10.1129
ENSG00000134109	EDEM1;EDEM1	-1.40328	1.44e-10		10.4047	10.4556	8.871	9.18094	-9.84164
ENSG00000142657	PGD;PGD	-1.13633	1.47e-10		13.8991	14.0026	12.8533	12.7774	-9.83268
ENSG00000165272	AQP3;AQP3	-1.90673	1.96e-10		8.76907	8.56319	6.57112	7.00347	-9.70774
ENSG00000162736	NCSTN;NCSTN	-1.51367	2.65e-10		9.65633	9.51093	8.19981	7.96122	-9.57675
ENSG00000107625	DDX50;DDX50	-1.85679	3.68e-10		8.85687	9.33443	7.0426	7.49381	-9.43415
ENSG00000166816	LDHD;LDHD	-2.37004	4.08e-10		7.56048	7.91912	5.40432	5.5675	-9.38934
ENSG00000132002	DNAJB1;DNAJB1	-1.20365	4.37e-10		11.0955	11.1362	9.94419	9.8865	-9.35952
ENSG00000210196	MT-TP;	-1.62996	4.8e-10		9.13666	8.96341	7.54045	7.3431	-9.31876
ENSG00000176907	TCIM;TCIM	-1.3546	5.14e-10		10.1777	10.1493	8.70415	8.922	-9.28904
ENSG00000144867	SRPRB;SRPRB	-1.33445	6.2e-10		10.0407	10.1892	8.77953	8.80054	-9.20761
ENSG00000160691	SHC1;SHC1	-1.2142	8.35e-10		11.5198	11.498	10.4118	10.1728	-9.07831
ENSG00000168140	VASN;VASN	-2.37103	8.78e-10		7.86574	8.18828	6.1026	5.28201	-9.05651
ENSG00000265168	;	-3.24204	8.91e-10		6.70554	7.26874	3.92464	4.27244	-9.05012
ENSG00000163131	CTSS;CTSS	-1.45543	1.03e-09		9.69655	10.0013	8.31287	8.50502	-8.98716
ENSG00000112972	HMGCS1;HMGCS1	-1.32694	1.18e-09		10.8555	11.0973	9.4996	9.80233	-8.92812
ENSG00000147100	SLC16A2;SLC16A2	-1.62134	1.32e-09		9.47399	9.04216	7.63046	7.71455	-8.87943
ENSG00000143384	MCL1;MCL1	-1.19963	1.44e-09		11.2528	11.114	9.92179	10.053	-8.84164
ENSG00000143761	ARF1;ARF1	-1.10517	1.51e-09		12.7331	12.7381	11.7007	11.5586	-8.82102
ENSG00000173692	PSMD1;PSMD1	-1.6681	1.53e-09		9.61706	10.0349	7.88083	8.43931	-8.81531
ENSG00000130638	ATXN10;ATXN10	-1.32826	1.76e-09		10.5686	10.8962	9.32549	9.50553	-8.75449
ENSG00000185215	TNFAIP2;TNFAIP2	-1.20027	1.83e-09		14.1174	13.9844	13.0151	12.6693	-8.73755
ENSG00000183283	DAZAP2;DAZAP2	-1.17094	2.04e-09		11.3109	11.2812	10.2076	10.0437	-8.69037
ENSG00000159403	C1R;C1R	-1.64131	3.39e-09		8.79153	8.62497	7.12749	7.06897	-8.4698
ENSG00000105518	TMEM205;UNQ501	-1.17673	3.54e-09		10.7553	10.8462	9.63188	9.62546	-8.451
ENSG00000116833	NR5A2;NR5A2	-1.76904	3.84e-09		9.65633	9.51846	7.36277	8.19714	-8.41567
ENSG00000232581	;	-1.58582	4.55e-09		8.74626	8.78756	7.23086	7.18325	-8.34199
ENSG00000163739	CXCL1;CXCL1	-1.33309	4.55e-09		9.72015	9.81608	8.37321	8.51513	-8.34199
ENSG00000114446	IFT57;IFT57	-1.94855	5.47e-09		7.98744	8.0634	6.03389	6.23878	-8.26201
ENSG00000182600	SNORC;SNORC	-1.47079	8.24e-09		9.35591	9.65229	8.19195	7.90083	-8.08407
ENSG00000108691	CCL2;CCL2	-2.29368	8.56e-09		7.87978	7.50949	5.23101	5.76113	-8.06753
ENSG00000121039	RDH10;RDH10	-1.41559	8.91e-09		9.38327	9.47525	7.89058	8.15467	-8.05012
ENSG00000198938	MT-CO3;COX3	-1.08258	1.09e-08		15.6522	15.4469	14.3742	14.5612	-7.96257
ENSG00000167964	RAB26;RAB26	-2.18653	1.26e-08		7.82278	7.48919	5.48374	5.66756	-7.89963
ENSG00000184164	CRELD2;CRELD2	-1.13514	1.36e-08		11.4284	11.5182	10.4494	10.224	-7.86646
ENSG00000167703	SLC43A2;SLC43A2	-1.83359	1.66e-08		8.1982	8.0634	6.24618	6.45022	-7.77989
ENSG00000210082	MT-RNR2;	-1.18629	1.76e-08		16.477	16.6015	15.1139	15.5604	-7.75449
ENSG00000114019	AMOTL2;AMOTL2	-1.14997	1.93e-08		10.7892	10.6498	9.61581	9.53398	-7.71444
ENSG00000138095	LRPPRC;LRPPRC	-1.49559	1.97e-08		10.5837	10.7902	8.80295	9.51396	-7.70553
ENSG00000183401	CCDC159;CCDC159	-1.08801	2e-08		11.1936	11.1321	10.0824	10.0737	-7.69897
ENSG00000101474	APMAP;APMAP	-1.09668	2.01e-08		11.2802	11.3025	10.2678	10.123	-7.6968
ENSG00000115652	UXS1;UXS1	-1.3408	2.26e-08		9.70446	9.84032	8.27616	8.59354	-7.64589
ENSG00000164638	SLC29A4;SLC29A4	-1.29404	2.43e-08		9.6502	9.59407	8.40757	8.26659	-7.61439
ENSG00000110048	OSBP;OSBP	-1.24446	3.37e-08		9.74529	9.70605	8.49003	8.49143	-7.47237
ENSG00000100554	ATP6V1D;ATP6V1D	-1.50196	4.02e-08		9.19116	9.63391	7.76902	8.09751	-7.39577
ENSG00000198840	MT-ND3;ND3	-1.01924	5.86e-08		13.8144	13.9969	12.818	12.9579	-7.2321
ENSG00000080819	CPOX;CPOX	-1.91831	5.94e-08		7.94132	7.76723	5.8858	6.12018	-7.22621
ENSG00000142619	PADI3;PADI3	-1.8615	6.06e-08		8.05705	7.84916	6.05138	6.25496	-7.21753
ENSG00000183010	PYCR1;PYCR1	-1.0631	7.43e-08		11.8952	11.7168	10.8228	10.6678	-7.12901
ENSG00000172809	RPL38;RPL38	-0.987011	8.17e-08		12.5441	12.4772	11.557	11.4923	-7.08778
ENSG00000135245	HILPDA;HILPDA	-1.41259	8.74e-08		9.41496	9.72136	7.95703	8.36674	-7.05849
ENSG00000130477	UNC13A;UNC13A	-2.39196	9.78e-08		7.54294	7.06438	4.84641	5.28201	-7.00966
ENSG00000271380	;	-1.44278	1.04e-07		8.7653	8.98532	7.50916	7.40238	-6.98297
ENSG00000065457	ADAT1;ADAT1	-1.63523	1.1e-07		8.36219	8.74539	6.81584	7.09616	-6.95861
ENSG00000163993	S100P;S100P	-1.60124	1.45e-07		8.35719	8.77923	6.95241	7.06897	-6.83863
ENSG00000182809	CRIP2;CRIP2	-1.24037	1.45e-07		9.48322	9.62464	8.29096	8.35928	-6.83863
ENSG00000212907	MT-ND4L;MT-ND4L	-1.37023	1.6e-07		11.0735	10.7147	9.20567	9.81193	-6.79588
ENSG00000072803	FBXW11;FBXW11	-1.15272	1.8e-07		9.95379	10.0746	8.82853	8.90929	-6.74473
ENSG00000149809	TM7SF2;TM7SF2	-1.50918	1.82e-07		8.93291	8.63886	7.45105	7.14904	-6.73993
ENSG00000114626	ABTB1;ABTB1	-1.39223	1.82e-07		8.83542	9.05948	7.60108	7.55388	-6.73993
ENSG00000112096	SOD2;SOD2	-1.12885	1.89e-07		11.0781	11.2416	9.86482	10.1897	-6.72354
ENSG00000170458	CD14;CD14	-1.82476	2.01e-07		7.74053	8.00025	6.08572	6.13773	-6.6968
ENSG00000117362	APH1A;APH1A	-1.07306	2.04e-07		10.9625	11.0754	10.0491	9.84303	-6.69037
ENSG00000127589	TUBBP1;	-2.26668	2.08e-07		7.16136	7.23256	5.1027	5.04214	-6.68194
ENSG00000168874	ATOH8;ATOH8	-1.5194	2.08e-07		8.46356	8.62031	7.15201	6.94485	-6.68194
ENSG00000035862	TIMP2;TIMP2	-1.18135	2.08e-07		11.7782	11.7534	10.8164	10.3126	-6.68194
ENSG00000130304	SLC27A1;SLC27A1	-1.58879	2.25e-07		8.6055	8.3032	7.01613	6.78696	-6.64782
ENSG00000170345	FOS;FOS	-1.86054	2.31e-07		8.56263	8.45745	6.15206	7.08715	-6.63639
ENSG00000188243	COMMD6;COMMD6	-1.47438	2.31e-07		8.86395	9.22206	7.76902	7.40238	-6.63639
ENSG00000076685	NT5C2;NT5C2	-1.04489	2.33e-07		10.9748	11.0948	9.93008	10.0553	-6.63264
ENSG00000126432	PRDX5;PRDX5	-1.12648	2.42e-07		12.721	12.5577	11.7172	11.2825	-6.61618
ENSG00000126247	CAPNS1;CAPNS1	-0.964786	2.47e-07		12.6354	12.7421	11.7792	11.6702	-6.6073
ENSG00000160410	SHKBP1;SHKBP1	-1.12394	2.6e-07		11.3096	11.237	10.3309	9.94873	-6.58503
ENSG00000179918	SEPHS2;SEPHS2	-1.02985	2.88e-07		11.4128	11.6156	10.5427	10.4348	-6.54061
ENSG00000127129	EDN2;EDN2	-2.31119	2.97e-07		7.04157	7.19545	4.9244	5.00437	-6.52724
ENSG00000151632	AKR1C2;AKR1C2	-1.11382	3.08e-07		14.6025	15.0043	13.5549	13.8387	-6.51145
ENSG00000130513	GDF15;GDF15	-0.977823	3.39e-07		13.1696	13.3479	12.3612	12.2028	-6.4698
ENSG00000262454	MIR193BHG;	-1.94934	3.59e-07		7.90059	7.45819	5.86618	5.7836	-6.44491
ENSG00000116857	TMEM9;TMEM9	-1.04671	3.73e-07		11.0442	11.1748	10.1621	9.9648	-6.42829
ENSG00000261604	;	-1.44659	4.29e-07		8.91597	9.20037	7.39737	7.84315	-6.36754
ENSG00000108960	MMD;MMD	-1.39294	4.32e-07		8.99227	9.11684	7.46417	7.86965	-6.36452
ENSG00000129910	CDH15;CDH15	-2.88198	4.61e-07		6.75208	6.45968	4.20019	3.91347	-6.3363
ENSG00000103591	AAGAB;AAGAB	-1.23699	4.75e-07		9.63165	9.96683	8.48038	8.67393	-6.32331
ENSG00000180879	SSR4;SSR4	-0.979018	4.87e-07		12.7576	12.9966	11.9442	11.8619	-6.31247
ENSG00000168710	AHCYL1;AHCYL1	-1.10079	4.94e-07		10.1806	10.3171	9.07498	9.23086	-6.30627
ENSG00000100938	GMPR2;GMPR2	-1.15	4.97e-07		10.0469	10.1558	8.81579	9.0892	-6.30364
ENSG00000135108	FBXO21;FBXO21	-1.17599	6.73e-07		9.7084	9.88179	8.5123	8.73863	-6.17198
ENSG00000163734	CXCL3;CXCL3	-1.83983	8.02e-07		7.66146	7.6349	5.76382	5.99095	-6.09583
ENSG00000022567	SLC45A4;SLC45A4	-1.17707	8.41e-07		9.65633	9.57253	8.55276	8.33286	-6.0752
ENSG00000133935	ERG28;ERG28	-1.33292	8.43e-07		9.03994	9.44131	7.84116	8.02391	-6.07417
ENSG00000188229	TUBB4B;TUBB4B	-0.998552	8.65e-07		11.1901	11.3616	10.3442	10.2168	-6.06298
ENSG00000127561	SYNGR3;SYNGR3	-1.14924	8.73e-07		9.74529	9.71918	8.69305	8.48116	-6.05899
ENSG00000158828	PINK1;PINK1	-1.12178	8.89e-07		10.0853	10.2218	9.16408	8.9016	-6.0511
ENSG00000198712	MT-CO2;MT-CO2	-1.01498	1.1e-06		15.7231	15.4334	14.418	14.7088	-5.95861
ENSG00000131069	ACSS2;ACSS2	-1.29763	1.16e-06		9.06166	9.22206	8.01164	7.69097	-5.93554
ENSG00000132432	SEC61G;SEC61G	-1.02969	1.16e-06		10.4746	10.6384	9.49322	9.57159	-5.93554
ENSG00000006283	CACNA1G;CACNA1G	-1.81271	1.22e-06		7.7785	7.52951	5.94313	5.891	-5.91364
ENSG00000250365	;	-1.75183	1.29e-06		7.67763	7.784	5.96175	6.12018	-5.88941
ENSG00000128590	DNAJB9;DNAJB9	-1.15575	1.35e-06		10.1634	10.5505	9.11087	9.32004	-5.86967
ENSG00000237973	MTCO1P12;	-1.05559	1.44e-06		12.1386	11.7146	10.8893	10.8873	-5.84164
ENSG00000137868	STRA6;STRA6	-0.986937	1.46e-06		11.2125	11.1132	10.2715	10.0805	-5.83565
ENSG00000104549	SQLE;SQLE	-1.05238	1.51e-06		10.5223	10.784	9.67341	9.54389	-5.82102
ENSG00000125968	ID1;ID1	-1.2259	1.52e-06		10.843	11.0813	9.41602	10.0131	-5.81816
ENSG00000117983	MUC5B;MUC5B	-1.51707	1.72e-06		9.46471	9.10688	8.13158	7.35815	-5.76447
ENSG00000112237	CCNC;CCNC	-1.41762	1.9e-06		8.37216	8.66624	7.11922	7.14904	-5.72125
ENSG00000107021	TBC1D13;TBC1D13	-1.26388	2.06e-06		9.10712	9.06634	7.98459	7.67303	-5.68613
ENSG00000171735	CAMTA1;CAMTA1	-1.31522	2.24e-06		8.72698	8.74111	7.53425	7.33551	-5.64975
ENSG00000196139	AKR1C3;AKR1C3	-1.07367	2.59e-06		13.7689	14.2822	12.8762	13.0673	-5.5867
ENSG00000205544	TMEM256;TMEM256	-2.12434	2.69e-06		7.13818	8.27976	5.67637	5.87015	-5.57025
ENSG00000105514	RAB3D;RAB3D	-1.27441	2.96e-06		8.83181	8.82449	7.47068	7.66699	-5.52871
ENSG00000105289	TJP3;TJP3	-1.54012	3.33e-06		8.33187	8.05652	6.8562	6.5188	-5.47756
ENSG00000269175	NA	-1.39848	3.45e-06		8.40651	8.82043	7.22317	7.28127	-5.46218
ENSG00000175215	CTDSP2;CTDSP2	-0.935583	3.6e-06		11.3836	11.2431	10.4394	10.3213	-5.4437
ENSG00000167996	FTH1;FTH1	-0.84769	3.67e-06		16.9597	17.0756	16.2154	16.1254	-5.43533
ENSG00000187608	ISG15;ISG15	-1.13107	3.98e-06		9.27854	9.40114	8.23084	8.20964	-5.40012
ENSG00000242498	ARPIN;ARPIN	-1.19075	4.16e-06		9.07087	9.172	8.0338	7.84849	-5.38091
ENSG00000176720	BOK;BOK	-1.62704	4.18e-06		8.33697	8.16287	6.9709	6.27095	-5.37882
ENSG00000128604	IRF5;IRF5	-1.41382	4.18e-06		8.29568	8.23779	6.90511	6.8628	-5.37882
ENSG00000159199	ATP5MC1;ATP5G1	-0.957738	4.18e-06		10.5077	10.5627	9.58613	9.57643	-5.37882
ENSG00000110063	DCPS;DCPS	-1.26394	4.23e-06		8.72309	8.71075	7.46417	7.48012	-5.37366
ENSG00000137834	SMAD6;SMAD6	-1.01161	4.53e-06		10.0203	10.0575	8.98912	9.0756	-5.3439
ENSG00000092330	TINF2;TINF2	-1.17532	4.54e-06		9.03367	9.172	7.95238	7.93134	-5.34294
ENSG00000073060	SCARB1;SCARB1	-0.912451	4.64e-06		11.547	11.5169	10.7055	10.5317	-5.33348
ENSG00000142227	EMP3;EMP3	-0.905088	4.64e-06		11.4195	11.5522	10.6077	10.5597	-5.33348
ENSG00000175938	ORAI3;MGC13024	-1.38932	5.02e-06		8.30611	8.30901	6.99821	6.89412	-5.2993
ENSG00000263585	;	-0.952794	5.35e-06		10.5675	10.6046	9.69304	9.57804	-5.27165
ENSG00000143515	ATP8B2;	-1.05881	6.07e-06		9.60865	9.61061	8.60402	8.51177	-5.21681
ENSG00000168389	MFSD2A;MFSD2A	-2.19759	7.02e-06		6.88332	6.87397	4.7209	4.96558	-5.15366
ENSG00000105246	EBI3;EBI3	-1.7824	7.07e-06		7.60342	7.38317	5.92427	5.64319	-5.15058
ENSG00000085662	AKR1B1;AKR1B1	-0.813791	7.07e-06		15.6459	15.7291	14.8851	14.8636	-5.15058
ENSG00000005238	FAM214B;FAM214B	-1.43225	7.82e-06		8.86395	8.55345	7.57108	6.98419	-5.10679
ENSG00000240849	TMEM189;TMEM189	-1.08211	9.52e-06		9.35842	9.47525	8.39735	8.29033	-5.02136
ENSG00000198804	MT-CO1;COX1	-0.884505	9.65e-06		16.5368	16.2305	15.465	15.5484	-5.01547
ENSG00000162627	SNX7;SNX7	-1.56609	1.02e-05		7.82278	7.91912	6.16818	6.5188	-4.9914
ENSG00000099194	SCD;SCD	-0.822426	1.11e-05		13.853	13.8321	13.0908	12.9466	-4.95468
ENSG00000117242	PINK1-AS;	-1.15607	1.11e-05		8.94297	9.14306	7.89542	7.91107	-4.95468
ENSG00000111911	HINT3;HINT3	-1.57788	1.12e-05		7.88675	7.98584	6.13576	6.63459	-4.95078
ENSG00000236609	ZNF853;ZNF853	-2.11139	1.13e-05		6.91093	7.19545	5.34883	4.75427	-4.94692
ENSG00000105290	APLP1;APLP1	-1.04339	1.13e-05		10.4998	10.3271	9.55275	9.1767	-4.94692
ENSG00000134419	RPS15A;RPS15A	-1.10101	1.17e-05		10.4803	11.0479	9.672	9.71588	-4.93181
ENSG00000143416	SELENBP1;HEL-S-134P	-1.50582	1.19e-05		7.94132	7.81695	6.4312	6.40744	-4.92445
ENSG00000198832	SELENOM;SELENOM	-1.03189	1.24e-05		10.228	10.6163	9.45102	9.36171	-4.90658
ENSG00000232573	RPL3P4;	-0.940667	1.24e-05		11.0238	11.3277	10.2347	10.2555	-4.90658
ENSG00000156411	ATP5MPL;C14orf2	-0.996924	1.28e-05		10.182	10.4866	9.35396	9.34481	-4.89279
ENSG00000228300	FAM174C;FAM174C	-1.11417	1.32e-05		9.24096	9.54082	8.2499	8.33666	-4.87943
ENSG00000089063	TMEM230;TMEM230	-0.919238	1.39e-05		10.8608	11.0915	10.0458	10.0816	-4.85699
ENSG00000174327	SLC16A13;SLC16A13	-1.27311	1.42e-05		8.86748	8.89176	7.84618	7.35815	-4.84771
ENSG00000158856	DMTN;DMTN	-0.96697	1.43e-05		10.0485	10.0592	9.154	9.02698	-4.84466
ENSG00000120253	NUP43;NUP43	-1.38652	1.45e-05		8.11161	8.14352	6.81584	6.73025	-4.83863
ENSG00000090054	SPTLC1;SPTLC1	-1.16419	1.59e-05		9.22455	9.69501	8.27987	8.36674	-4.7986
ENSG00000070540	WIPI1;WIPI1	-1.08276	1.72e-05		9.17986	9.20037	8.08139	8.15467	-4.76447
ENSG00000167693	NXN;NXN	-0.966232	1.75e-05		11.0442	10.8991	10.1701	9.82959	-4.75696
ENSG00000167281	RBFOX3;RBFOX3	-1.55552	1.83e-05		8.57993	8.09061	7.12749	6.4642	-4.73755
ENSG00000166979	EVA1C;EVA1C	-1.00577	1.86e-05		9.6866	9.83027	8.8209	8.6978	-4.73049
ENSG00000105137	SYDE1;SYDE1	-1.18177	2e-05		8.85331	8.89562	7.84116	7.5604	-4.69897
ENSG00000167711	SERPINF2;SERPINF2	-2.08913	2.01e-05		6.75208	7.00842	4.84641	5.04214	-4.6968
ENSG00000172794	RAB37;RAB37	-2.11265	2.19e-05		7.02902	6.67267	4.84641	4.96558	-4.65956
ENSG00000142669	SH3BGRL3;SH3BGRL3	-1.03575	2.32e-05		10.0123	9.71481	8.93127	8.74723	-4.63451
ENSG00000132471	WBP2;WBP2	-1.01818	2.35e-05		11.3226	11.0617	10.3888	9.94125	-4.62893
ENSG00000166974	MAPRE2;MAPRE2	-1.52357	2.39e-05		7.83003	7.66235	6.21548	6.33321	-4.6216
ENSG00000163597	SNHG16;	-0.905449	2.52e-05		11.8795	12.1365	10.9794	11.2288	-4.5986
ENSG00000169174	PCSK9;PCSK9	-1.51702	2.77e-05		8.20379	7.99306	6.90511	6.27095	-4.55752
ENSG00000174951	FUT1;FUT1	-2.58437	2.95e-05		6.2667	6.61763	4.48391	3.74046	-4.53018
ENSG00000014216	CAPN1;CAPN1	-0.920577	3.12e-05		11.246	11.1239	10.4211	10.0963	-4.50585
ENSG00000153029	MR1;MR1	-1.09399	3.43e-05		9.1656	9.40114	8.07286	8.32522	-4.46471
ENSG00000149260	CAPN5;CAPN5	-1.17223	4.1e-05		9.2679	8.98532	8.16409	7.75492	-4.38722
ENSG00000135506	OS9;OS9	-0.800958	4.19e-05		12.1506	12.2	11.4394	11.3084	-4.37779
ENSG00000144579	CTDSP1;CTDSP1	-1.00912	4.3e-05		10.3414	10.1702	9.44442	9.03403	-4.36653
ENSG00000126709	IFI6;IFI6	-0.915466	4.33e-05		10.162	10.0332	9.19587	9.18094	-4.36351
ENSG00000090339	ICAM1;ICAM1	-1.52242	4.34e-05		7.62024	7.60691	6.13576	6.15507	-4.36251
ENSG00000136205	TNS3;TNS3	-0.909225	4.59e-05		11.3219	11.119	10.4584	10.1599	-4.33819
ENSG00000269926	DDIT4-AS1;	-0.793941	4.75e-05		12.4015	12.2704	11.5786	11.5093	-4.32331
ENSG00000105605	CACNG7;CACNG7	-1.48748	4.77e-05		7.88675	7.70698	6.5218	6.17221	-4.32148
ENSG00000100379	KCTD17;KCTD17	-1.26151	4.96e-05		8.47285	8.22557	7.05998	7.17478	-4.30452
ENSG00000260260	SNHG19;	-1.11103	5.17e-05		9.18834	9.67718	8.32371	8.37786	-4.28651
ENSG00000101084	RAB5IF;RAB5IF	-1.63738	5.25e-05		7.56917	8.55345	6.5218	6.57141	-4.27984
ENSG00000117395	EBNA1BP2;EBNA1BP2	-0.922323	5.25e-05		10.0155	10.2249	9.20371	9.20819	-4.27984
ENSG00000127838	PNKD;PNKD	-1.00964	5.34e-05		10.0407	9.76844	9.04475	8.75578	-4.27246
ENSG00000141026	MED9;MED9	-1.44974	5.36e-05		7.68564	8.08385	6.44449	6.53213	-4.27084
ENSG00000247556	OIP5-AS1;	-0.904457	5.55e-05		10.6176	10.7125	9.61581	9.89942	-4.25571
ENSG00000162496	DHRS3;DHRS3	-0.823345	5.55e-05		10.955	10.9667	10.152	10.1274	-4.25571
ENSG00000141401	IMPA2;IMPA2	-1.03503	5.63e-05		9.24096	9.09685	8.16409	8.12857	-4.24949
ENSG00000171903	CYP4F11;CYP4F11	-1.15645	5.7e-05		8.61393	8.56804	7.39737	7.50738	-4.24413
ENSG00000263528	IKBKE;IKBKE	-1.15602	6.38e-05		8.71919	8.51882	7.49644	7.47322	-4.19518
ENSG00000213741	RPS29;RPS29	-1.0752	6.45e-05		13.2049	13.9887	12.5295	12.6183	-4.19044
ENSG00000284526	;	-0.953257	6.53e-05		10.8086	11.1557	9.87836	10.1886	-4.18509
ENSG00000196683	TOMM7;TOM7	-0.90864	6.73e-05		10.0868	10.0949	9.27986	9.08694	-4.17198
ENSG00000095261	PSMD5;PSMD5	-1.06758	6.76e-05		9.09514	9.28524	7.99367	8.26659	-4.17005
ENSG00000137522	RNF121;RNF121	-0.966444	6.95e-05		9.47399	9.41734	8.4836	8.49143	-4.15802
ENSG00000130433	CACNG6;CACNG6	-1.09201	7.05e-05		8.92616	9.06292	8.04694	7.77188	-4.15181
ENSG00000184371	CSF1;CSF1	-0.914362	7.05e-05		10.7486	10.6163	9.92771	9.59878	-4.15181
ENSG00000132541	RIDA;RIDA	-2.67652	7.05e-05		6.17858	6.07997	3.6768	3.99276	-4.15181
ENSG00000169136	ATF5;ATF5	-1.20605	7.1e-05		8.76151	8.57287	7.67061	7.26539	-4.14874
ENSG00000148346	LCN2;LCN2	-0.969383	7.1e-05		10.9274	10.7871	10.1109	9.63476	-4.14874
ENSG00000125843	AP5S1;AP5S1	-1.21372	7.33e-05		8.55827	8.70636	7.63626	7.20839	-4.1349
ENSG00000090520	DNAJB11;DNAJB11	-0.874035	7.47e-05		10.2832	10.1829	9.33445	9.39311	-4.12668
ENSG00000111087	GLI1;GLI1	-1.14095	7.81e-05		8.58851	8.52382	7.45105	7.41683	-4.10735
ENSG00000149743	TRPT1;TRPT1	-1.14025	8.13e-05		8.71528	8.93743	7.85118	7.54075	-4.08991
ENSG00000079459	FDFT1;FDFT1	-0.883038	8.14e-05		11.1067	11.4171	10.4828	10.2883	-4.08938
ENSG00000179134	SAMD4B;SAMD4B	-1.11601	8.52e-05		10.1961	9.59882	8.96395	8.65882	-4.06956
ENSG00000196358	NTNG2;NTNG2	-1.74372	8.52e-05		7.17281	7.11825	5.65365	5.31324	-4.06956
ENSG00000130021	PUDP;PUDP	-1.01199	8.58e-05		9.41254	9.65684	8.39735	8.66185	-4.06651
ENSG00000149480	MTA2;MTA2	-0.856516	8.58e-05		10.561	10.4398	9.70966	9.58445	-4.06651
ENSG00000130714	POMT1;POMT1	-1.14334	8.66e-05		8.59277	8.49356	7.46417	7.37305	-4.06248
ENSG00000077238	IL4R;IL4R	-1.00418	8.76e-05		9.47399	9.27638	8.47391	8.2864	-4.0575
ENSG00000265491	RNF115;RNF115	-0.96527	9.12e-05		9.57669	9.63853	8.769	8.51848	-4.04001
ENSG00000111678	C12orf57;C12orf57	-0.924985	9.21e-05		11.3018	11.7896	10.6549	10.6304	-4.03574
ENSG00000103522	IL21R;IL21R	-3.48031	9.44e-05		5.52983	5.74538	3.1365	2.88864	-4.02503
ENSG00000184524	CEND1;CEND1	-2.8392	9.46e-05		6.0354	5.90713	3.76423	3.43448	-4.02411
ENSG00000123472	ATPAF1;ATPAF1	-1.18085	9.59e-05		8.71919	9.3057	7.84116	7.90596	-4.01818
ENSG00000163479	SSR2;SSR2	-0.832496	9.72e-05		12.1779	12.5191	11.5354	11.5181	-4.01233
ENSG00000148344	PTGES;PTGES	-0.819294	0.000106355		12.076	12.2915	11.4771	11.2526	-3.97324
ENSG00000104320	NBN;NBN	-1.57727	0.000108071		7.54294	7.69817	5.74245	6.3929	-3.96629
ENSG00000239672	NME1;NME1	-1.12116	0.000110229		8.75391	9.2066	7.85617	7.92124	-3.9577
ENSG00000285677	;	-0.855158	0.000110793		10.94	11.1796	10.1088	10.3078	-3.95549
ENSG00000090932	DLL3;DLL3	-1.18783	0.000113303		8.40651	8.48334	7.42446	7.114	-3.94576
ENSG00000151665	PIGF;PIGF	-1.08574	0.000118161		8.78408	9.04564	7.73696	7.95133	-3.92753
ENSG00000171560	FGA;FGA	-1.23661	0.000119404		8.48668	8.83257	7.18407	7.67903	-3.92298
ENSG00000168679	SLC16A4;SLC16A4	-1.1471	0.000121908		9.8327	10.3582	8.64491	9.24914	-3.91397
ENSG00000171223	JUNB;JUNB	-0.821308	0.000122373		11.0978	10.8816	10.1801	10.1696	-3.91231
ENSG00000163472	TMEM79;TMEM79	-0.962184	0.000125997		9.3931	9.43071	8.55583	8.35178	-3.89964
ENSG00000177666	PNPLA2;PNPLA2	-0.931142	0.000126867		10.5111	10.3568	9.69304	9.29679	-3.89665
ENSG00000205436	EXOC3L4;EXOC3L4	-1.49883	0.000127973		7.52518	7.4686	6.16818	5.93181	-3.89288
ENSG00000185236	RAB11B;RAB11B	-1.01513	0.000128582		9.90999	9.67718	8.99139	8.55487	-3.89082
ENSG00000186529	CYP4F3;CYP4F3	-1.19088	0.0001342		8.42099	8.28566	7.05998	7.30477	-3.87225
ENSG00000226221	RPL26P19;	-1.40925	0.000138146		8.00035	8.55345	6.59516	7.19168	-3.85966
ENSG00000227051	C14orf132;C14orf132	-1.05645	0.00014009		9.08911	8.85257	8.0294	7.82701	-3.85359
ENSG00000164211	STARD4;STARD4	-1.38383	0.000162158		7.66146	7.84916	6.27623	6.54534	-3.79006
ENSG00000169020	ATP5ME;ATP5ME	-1.06333	0.000163717		9.11901	9.60118	8.227	8.41792	-3.78591
ENSG00000117115	PADI2;PADI2	-1.69712	0.00016597		7.43297	6.9202	5.53437	5.64319	-3.77997
ENSG00000172500	FIBP;FIBP	-0.856332	0.000174993		10.3222	10.5808	9.64921	9.55699	-3.75698
ENSG00000198892	SHISA4;SHISA4	-1.16936	0.000179189		8.6916	8.45745	7.6129	7.21667	-3.74669
ENSG00000074181	NOTCH3;NOTCH3	-1.25666	0.000179606		8.58422	8.66171	7.69307	6.99386	-3.74568
ENSG00000115415	STAT1;STAT1	-0.901511	0.000182871		10.7752	10.9039	9.70966	10.1427	-3.73786
ENSG00000215375	MYL5;MYL5	-1.0257	0.000185477		9.55498	9.98506	8.58013	8.9321	-3.73171
ENSG00000104946	TBC1D17;TBC1D17	-1.05172	0.000185672		9.85419	9.84232	9.08351	8.45339	-3.73125
ENSG00000154511	DIPK1A;DIPK1A	-1.75298	0.000185758		6.82646	7.54925	5.45775	5.66756	-3.73105
ENSG00000247095	MIR210HG;	-2.41659	0.000187432		6.01009	6.69056	3.84666	4.55966	-3.72716
ENSG00000007255	TRAPPC6A;TRAPPC6A	-0.990131	0.000190555		9.33058	9.27045	8.47391	8.14602	-3.71998
ENSG00000163468	CCT3;CCT3	-0.783161	0.000195072		12.2827	12.5818	11.6553	11.6596	-3.70981
ENSG00000215182	MUC5AC;MUC5AC	-1.64022	0.000198147		7.53409	7.40501	6.24618	5.43181	-3.70301
ENSG00000146232	NFKBIE;NFKBIE	-0.993672	0.000216655		8.90228	9.03167	7.96166	8.00969	-3.66423
ENSG00000187134	AKR1C1;AKR1C1	-0.862172	0.000217239		12.587	12.9216	11.7086	12.0734	-3.66306
ENSG00000249992	TMEM158;TMEM158	-1.30817	0.000228094		7.83003	7.84916	6.68752	6.4361	-3.64189
ENSG00000145555	MYO10;MYO10	-1.02017	0.000229661		10.3728	10.0349	8.89783	9.44866	-3.63891
ENSG00000138101	DTNB;DTNB	-1.28855	0.000232004		7.78597	8.0634	6.60704	6.74177	-3.6345
ENSG00000253669	GASAL1;	-1.6896	0.00024177		7.07856	6.93528	5.48374	5.34381	-3.6166
ENSG00000105204	DYRK1B;DYRK1B	-1.01924	0.000241911		9.41977	9.60118	8.72337	8.2384	-3.61634
ENSG00000072310	SREBF1;SREBF1	-0.947786	0.000241952		12.0638	11.8713	11.3015	10.6806	-3.61627
ENSG00000124107	SLPI;SLPI	-1.08127	0.00024801		9.21351	9.81404	8.33446	8.59672	-3.60553
ENSG00000102312	PORCN;PORCN	-1.0319	0.00025908		8.68362	8.68421	7.64205	7.69097	-3.58657
ENSG00000103018	CYB5B;CYB5B	-0.841194	0.000269175		11.7052	12.0808	10.9442	11.1767	-3.56997
ENSG00000172927	MYEOV;MYEOV	-0.807627	0.000278207		10.5346	10.5095	9.8145	9.61297	-3.55563
ENSG00000167552	TUBA1A;TUBA1A	-0.803765	0.000303236		10.3235	10.4841	9.58313	9.62702	-3.51822
ENSG00000006756	ARSD;ARSD	-0.899758	0.000305152		9.60232	9.67718	8.86853	8.61249	-3.51548
ENSG00000141504	SAT2;SAT2	-0.935938	0.000313182		9.85597	10.1265	9.24419	8.86255	-3.5042
ENSG00000175198	PCCA;PCCA	-1.83394	0.000316747		6.62448	7.15737	4.96186	5.40307	-3.49929
ENSG00000105520	PLPPR2;LPPR2	-1.16878	0.000319242		8.40165	8.11068	7.03383	7.20006	-3.49588
ENSG00000180066	LINC02870;	-3.358	0.000321932		5.78985	5.21322	2.99908	3.04564	-3.49224
ENSG00000267607	;	-2.34538	0.000329435		6.24517	6.05256	3.99861	4.20744	-3.48223
ENSG00000092096	SLC22A17;SLC22A17	-1.29042	0.000329453		8.15267	7.84117	6.93367	6.53213	-3.48221
ENSG00000147400	CETN2;CETN2	-1.0676	0.000337798		9.31774	9.95762	8.47066	8.7415	-3.47134
ENSG00000149657	LSM14B;LSM14B	-0.966722	0.000348845		9.32546	9.05258	8.15603	8.31754	-3.45737
ENSG00000257342	;	-0.807062	0.000350658		10.6373	10.7136	9.9959	9.73474	-3.45512
ENSG00000095539	SEMA4G;SEMA4G	-1.11187	0.000351652		8.3009	8.26192	7.21543	7.16625	-3.45389
ENSG00000260267	;	-1.30156	0.000363929		7.85156	7.62563	6.47072	6.49176	-3.43898
ENSG00000183648	NDUFB1;NDUFB1	-1.02906	0.000367555		8.98579	9.50589	8.23084	8.26659	-3.43468
ENSG00000178538	CA8;CA8	-1.34135	0.000377984		7.65331	7.66235	6.19989	6.50534	-3.42253
ENSG00000185115	NSMCE3;NSMCE3	-1.03786	0.000387237		8.51844	8.69311	7.55278	7.61781	-3.41202
ENSG00000065057	NTHL1;NTHL1	-0.866678	0.000389444		9.6866	9.91451	9.00267	8.88091	-3.40955
ENSG00000159921	GNE;GNE	-0.844128	0.000399542		9.66447	9.69057	8.871	8.80604	-3.39844
ENSG00000179820	MYADM;MYADM	-0.820443	0.000427716		11.4397	11.2117	10.672	10.3309	-3.36884
ENSG00000147383	NSDHL;NSDHL	-0.917446	0.000436831		9.30739	9.12344	8.29463	8.32522	-3.35969
ENSG00000196659	TTC30B;TTC30B	-1.70706	0.000438491		7.10271	6.70823	5.29112	5.34381	-3.35804
ENSG00000255108	;	-0.902588	0.000445369		9.28383	9.35981	8.51545	8.33286	-3.35128
ENSG00000075142	SRI;SRI	-0.854101	0.000454935		9.6846	9.92399	8.98458	8.93461	-3.34205
ENSG00000000003	TSPAN6;TSPAN6	-1.06169	0.000459953		9.36841	9.93903	8.38361	8.83592	-3.33729
ENSG00000287603	;	-1.2969	0.000461604		7.87278	7.92668	6.87596	6.34837	-3.33573
ENSG00000119950	MXI1;MXI1	-1.02411	0.000470616		8.94297	8.93368	7.69307	8.12857	-3.32733
ENSG00000227619	;	-1.66476	0.000479414		6.82646	6.99409	5.29112	5.40307	-3.31929
ENSG00000179403	VWA1;VWA1	-0.963418	0.000479501		8.81729	8.81637	7.85617	7.8749	-3.31921
ENSG00000004468	CD38;CD38	-1.30349	0.000481551		7.95465	7.87286	6.33453	6.90441	-3.31736
ENSG00000108641	B9D1;B9D1	-0.809885	0.000481852		10.0123	10.2079	9.30195	9.31233	-3.31709
ENSG00000111671	SPSB2;SPSB2	-0.813313	0.000494423		9.81819	9.82825	9.00716	9.02227	-3.3059
ENSG00000158402	CDC25C;CDC25C	-1.78681	0.000497953		6.88332	6.74294	4.84641	5.40307	-3.30281
ENSG00000006016	CRLF1;CRLF1	-1.11204	0.000508504		8.32162	8.33199	7.39051	7.05979	-3.29371
ENSG00000132196	HSD17B7;HSD17B7	-1.03877	0.00051421		8.43532	8.62497	7.55891	7.45933	-3.28886
ENSG00000166797	CIAO2A;CIAO2A	-0.86872	0.000568884		9.47168	9.72787	8.7769	8.70664	-3.24498
ENSG00000119801	YPEL5;YPEL5	-0.890275	0.000584728		9.58314	9.89535	8.74502	8.97178	-3.23305
ENSG00000138600	SPPL2A;SPPL2A	-0.86608	0.000594778		9.58956	9.812	8.73694	8.94462	-3.22565
ENSG00000165637	VDAC2;VDAC2	-0.801197	0.000605726		11.3687	11.7907	10.7644	10.8251	-3.21772
ENSG00000133321	PLAAT4;PLAAT4	-2.32326	0.000607928		6.06027	6.02463	3.99861	4.06793	-3.21615
ENSG00000197457	STMN3;STMN3	-1.43703	0.000613651		7.50721	7.15737	5.96175	5.9715	-3.21208
ENSG00000186204	CYP4F12;CYP4F12	-1.60022	0.000628992		7.01637	6.88955	5.40432	5.48763	-3.20135
ENSG00000104805	NUCB1;NUCB1	-0.81846	0.000628992		12.3163	12.0834	11.5917	11.1482	-3.20135
ENSG00000142303	ADAMTS10;ADAMTS10	-1.00445	0.000630554		8.8426	8.72818	7.95238	7.61781	-3.20028
ENSG00000113300	CNOT6;CNOT6	-1.16382	0.000636898		8.71528	8.78756	7.17612	7.93636	-3.19593
ENSG00000102100	SLC35A2;SLC35A2	-0.8847	0.000644944		9.27854	9.43867	8.57106	8.3889	-3.19048
ENSG00000116584	ARHGEF2;ARHGEF2	-0.810076	0.000658742		10.5478	10.6057	9.93598	9.58125	-3.18128
ENSG00000141295	SCRN2;SCRN2	-0.9757	0.000662827		9.2891	9.23736	8.52173	8.02863	-3.1786
ENSG00000157150	TIMP4;TIMP4	-0.850945	0.000665391		9.42696	9.60118	8.63914	8.7037	-3.17692
ENSG00000125652	ALKBH7;ALKBH7	-0.832003	0.000677534		9.93037	9.95762	9.25555	8.96196	-3.16907
ENSG00000011485	PPP5C;PPP5C	-0.798534	0.000688949		9.95213	9.90496	9.20567	9.05958	-3.16181
ENSG00000173805	HAP1;HAP1	-2.82955	0.000695461		5.78985	5.5238	3.58373	3.18722	-3.15773
ENSG00000139044	B4GALNT3;B4GALNT3	-3.16412	0.000718331		5.16734	5.74538	2.99908	3.18722	-3.14368
ENSG00000136149	RPL13AP25;	-1.20147	0.000718794		7.83003	7.7923	6.69866	6.58427	-3.1434
ENSG00000163762	TM4SF18;TM4SF18	-1.0267	0.000721502		8.50038	8.81637	7.54663	7.75492	-3.14176
ENSG00000285908	;	-1.38968	0.00075616		7.69361	7.59746	6.60704	5.91155	-3.12139
ENSG00000108984	MAP2K6;MAP2K6	-1.29272	0.000758334		7.96786	8.11068	6.36282	7.10511	-3.12014
ENSG00000164405	UQCRQ;UQCRQ	-0.822119	0.000758334		11.0697	11.5498	10.5427	10.4742	-3.12014
ENSG00000152642	GPD1L;GPD1L	-1.09365	0.000785899		8.63478	8.8406	7.33448	7.93134	-3.10463
ENSG00000159713	TPPP3;CGI-38	-2.31852	0.00079897		5.9581	6.02463	3.99861	3.99276	-3.09747
ENSG00000243710	CFAP57;CFAP57	-1.10899	0.000800601		8.11755	8.42041	7.3129	7.05056	-3.09658
ENSG00000114125	RNF7;RNF7	-0.828018	0.000800601		9.47168	9.4881	8.69026	8.62499	-3.09658
ENSG00000123989	CHPF;CHPF	-0.832836	0.00081584		10.8714	10.9276	10.29	9.80783	-3.0884
ENSG00000286190	;LOC728392	-2.08788	0.000833208		6.46599	6.3737	4.9244	3.99276	-3.07925
ENSG00000125870	SNRPB2;SNRPB2	-0.978826	0.000840977		9.52178	9.99049	8.54969	9.01753	-3.07522
ENSG00000265688	MAFG-DT;	-0.941225	0.000855149		8.89884	8.85257	8.06427	7.81615	-3.06796
ENSG00000100228	RAB36;RAB36	-1.45077	0.000886872		7.12645	7.38317	5.67637	6.04776	-3.05214
ENSG00000099999	RNF215;RNF215	-0.941336	0.000888604		8.95628	8.96341	8.18008	7.85911	-3.05129
ENSG00000249348	UGDH-AS1;	-1.82878	0.000897321		6.52078	6.56041	4.99838	4.70802	-3.04705
ENSG00000067836	ROGDI;ROGDI	-1.75867	0.000930118		6.50274	6.77683	5.1027	4.92572	-3.03146
ENSG00000169429	CXCL8;IL8	-0.871088	0.000934466		10.5401	10.9501	9.67623	10.0782	-3.02944
ENSG00000147535	PLPP5;PLPP5	-0.806293	0.000943485		9.64405	9.61998	8.769	8.89129	-3.02527
ENSG00000162241	SLC25A45;SLC25A45	-1.12142	0.00101871		8.78034	8.40965	7.76372	7.18325	-2.99195
ENSG00000135127	BICDL1;BICDL1	-1.36205	0.00104715		7.59493	7.64411	6.60704	5.91155	-2.97999
ENSG00000196743	GM2A;GM2A	-0.852606	0.00104855		9.38327	9.19412	8.44774	8.44637	-2.97941
ENSG00000104081	BMF;BMF	-1.55454	0.0010487		7.05401	6.80994	5.48374	5.45999	-2.97935
ENSG00000272173	;	-0.791228	0.00106503		11.0301	11.4833	10.4796	10.4896	-2.97264
ENSG00000188488	SERPINA5;SERPINA5	-3.01596	0.00109017		5.21241	5.67523	3.1365	3.18722	-2.9625
ENSG00000105427	CNFN;CNFN	-1.5399	0.00110705		6.89719	7.74172	5.72076	6.06621	-2.95583
ENSG00000215717	TMEM167B;TMEM167B	-1.17604	0.00116483		7.72506	7.95656	6.58319	6.80904	-2.93374
ENSG00000141337	ARSG;ARSG	-1.0977	0.00117241		8.12935	8.26789	7.30563	6.91463	-2.93092
ENSG00000100387	RBX1;RBX1	-0.872998	0.0012113		9.23004	9.56527	8.60698	8.47081	-2.91675
ENSG00000166128	RAB8B;RAB8B	-1.49066	0.00127012		7.51622	7.98584	5.69873	6.76454	-2.89616
ENSG00000136883	KIF12;KIF12	-2.19202	0.00129618		6.13241	5.96707	3.92464	4.33464	-2.88733
ENSG00000167105	TMEM92;TMEM92	-1.24427	0.00131014		7.47982	7.57837	6.29103	6.36337	-2.88268
ENSG00000198899	MT-ATP6;ATP6	-0.843815	0.0013186		14.2404	13.6476	12.9548	13.2876	-2.87989
ENSG00000125089	SH3TC1;SH3TC1	-1.20554	0.00132989		8.32162	8.40423	7.54045	6.69511	-2.87619
ENSG00000174837	ADGRE1;ADGRE1	-1.03857	0.00138466		8.16419	8.48846	7.38363	7.24123	-2.85866
ENSG00000105058	FAM32A;FAM32A	-1.00588	0.00141314		8.6055	8.32054	7.37671	7.57979	-2.84981
ENSG00000198053	SIRPA;SIRPA	-0.937059	0.00141314		8.66752	8.61563	7.80554	7.62405	-2.84981
ENSG00000158006	PAFAH2;PAFAH2	-1.06611	0.00142571		8.06322	8.13047	6.94307	7.15767	-2.84597
ENSG00000198088	NUP62CL;NUP62CL	-1.94896	0.00143437		6.06027	6.56041	4.53452	4.61083	-2.84334
ENSG00000100034	PPM1F;PPM1F	-0.798667	0.00146529		9.6806	9.62231	8.96856	8.73863	-2.83408
ENSG00000168517	HEXIM2;HEXIM2	-1.05225	0.00146558		8.31647	8.59203	7.62463	7.19168	-2.83399
ENSG00000067064	IDI1;IDI1	-0.812105	0.0015053		9.49922	9.78102	8.80036	8.8783	-2.82238
ENSG00000103490	PYCARD;PYCARD	-1.1257	0.00153518		7.91429	7.97127	7.0072	6.6591	-2.81384
ENSG00000155252	PI4K2A;PI4K2A	-0.786788	0.00160013		9.47168	9.60355	8.73964	8.77553	-2.79585
ENSG00000100644	HIF1A;HIF1A	-0.835916	0.00160907		10.7486	10.4879	9.52329	10.0179	-2.79343
ENSG00000210144	MT-TY;	-0.81379	0.00161278		9.60443	9.3626	8.71516	8.64661	-2.79243
ENSG00000132639	SNAP25;SNAP25	-1.76269	0.0016303		6.46599	6.50082	4.76396	4.96558	-2.78773
ENSG00000136144	RCBTB1;RCBTB1	-1.11155	0.00166047		7.96127	7.865	6.95241	6.69511	-2.77977
ENSG00000082014	SMARCD3;SMARCD3	-0.916378	0.00170829		8.59277	8.74967	7.72065	7.81615	-2.76744
ENSG00000118640	VAMP8;VAMP8	-1.27683	0.00172794		7.27196	7.54925	6.18412	6.18914	-2.76247
ENSG00000136213	CHST12;CHST12	-0.979195	0.00177359		8.43532	8.62961	7.72065	7.40238	-2.75115
ENSG00000085449	WDFY1;WDFY1	-1.27437	0.00177981		7.93461	7.70698	6.16818	6.91463	-2.74963
ENSG00000136848	DAB2IP;DAB2IP	-0.872486	0.0017879		9.09514	9.14306	8.41096	8.07946	-2.74766
ENSG00000167861	HID1;HID1	-1.05519	0.00178828		8.78408	8.74111	8.0338	7.32022	-2.74756
ENSG00000177045	SIX5;SIX5	-0.887007	0.00183187		9.10712	9.08337	8.39392	8.01444	-2.7371
ENSG00000160345	C9orf116;C9orf116	-1.48868	0.00186613		6.79717	7.05059	5.60711	5.43181	-2.72906
ENSG00000146678	IGFBP1;IGFBP1	-0.863662	0.00186613		10.0593	10.6635	9.59808	9.46265	-2.72906
ENSG00000177051	FBXO46;FBXO46	-0.846701	0.00187578		9.2218	9.02464	8.35924	8.21379	-2.72682
ENSG00000205060	SLC35B4;SLC35B4	-0.905898	0.00193795		9.81819	9.78519	8.54661	9.18728	-2.71266
ENSG00000155097	ATP6V1C1;ATP6V1C1	-1.00952	0.00195899		9.1512	9.35981	7.84116	8.58397	-2.70797
ENSG00000102048	ASB9;ASB9	-0.915512	0.00212561		8.61812	8.88401	7.74772	7.95133	-2.67252
ENSG00000173581	CCDC106;CCDC106	-0.894611	0.00220827		9.04306	8.92615	8.27987	7.89568	-2.65595
ENSG00000122779	TRIM24;TRIM24	-1.72538	0.00222843		6.82646	6.32872	4.76396	5.21745	-2.652
ENSG00000265190	ANXA8;ANXA8	-2.72836	0.00223777		5.84815	5.21322	3.6768	3.04564	-2.65018
ENSG00000073464	CLCN4;CLCN4	-0.970372	0.00224569		8.68362	8.36578	7.44445	7.70281	-2.64865
ENSG00000104967	NOVA2;NOVA2	-3.06524	0.00228861		5.07272	5.44167	2.99908	3.04564	-2.64043
ENSG00000198125	MB;GLNG	-1.30477	0.00241445		7.19544	7.19545	5.94313	5.95179	-2.61718
ENSG00000139832	RAB20;RAB20	-1.68975	0.002419		6.59073	6.39568	4.99838	4.88473	-2.61637
ENSG00000107164	FUBP3;FUBP3	-0.889785	0.002419		9.17986	8.77923	8.14793	8.07946	-2.61637
ENSG00000087842	PIR;PIR	-0.793522	0.00242831		9.59595	9.77893	8.74233	9.0457	-2.6147
ENSG00000021574	SPAST;SPAST	-1.37831	0.0024395		7.0036	7.25678	5.63057	5.99095	-2.6127
ENSG00000269386	RAB11B-AS1;	-1.42769	0.00245898		7.53409	7.07804	6.27623	5.54137	-2.60925
ENSG00000111319	SCNN1A;SCNN1A	-1.0673	0.00251886		8.25316	7.8571	7.11091	6.93485	-2.5988
ENSG00000063180	CA11;CA11	-0.979044	0.0025345		8.42578	8.14352	7.33448	7.32789	-2.59611
ENSG00000169403	PTAFR;PTAFR	-2.49308	0.00254481		5.81929	5.63884	3.1365	4.06793	-2.59435
ENSG00000287037	;	-0.833201	0.00254481		10.2924	10.6198	9.35572	9.86953	-2.59435
ENSG00000173327	MAP3K11;MAP3K11	-0.885009	0.00257307		10.0777	10.0297	9.4739	8.79225	-2.58955
ENSG00000126243	LRFN3;LRFN3	-1.10867	0.00271066		8.77284	8.58727	7.96627	7.07809	-2.56693
ENSG00000196411	EPHB4;EPHB4	-0.836779	0.0027357		10.3015	10.2371	9.7069	9.10267	-2.56293
ENSG00000149600	COMMD7;COMMD7	-0.96865	0.00280934		8.35719	8.8723	7.64781	7.71455	-2.5514
ENSG00000105778	AVL9;AVL9	-0.800039	0.00283485		10.3376	10.2687	9.22313	9.7448	-2.54747
ENSG00000105516	DBP;DBP	-1.0125	0.00285604		8.26925	8.17563	7.41773	7.01301	-2.54424
ENSG00000177875	CCDC184;CCDC184	-1.35302	0.0028971		7.19544	7.02262	5.98012	5.64319	-2.53804
ENSG00000185442	FAM174B;FAM174B	-1.2168	0.00291914		7.51622	7.865	6.77432	6.20588	-2.53475
ENSG00000027697	IFNGR1;IFNGR1	-0.859845	0.00291914		9.03053	9.39296	8.23084	8.49824	-2.53475
ENSG00000170439	METTL7B;METTL7B	-1.52979	0.00293767		6.88332	6.56041	5.32027	5.28201	-2.532
ENSG00000118292	C1orf54;C1orf54	-0.916094	0.00294631		8.5539	8.64346	7.85118	7.52082	-2.53072
ENSG00000274180	NATD1;NATD1	-0.994504	0.00301506		8.92277	8.89176	8.2423	7.51412	-2.5207
ENSG00000104998	IL27RA;IL27RA	-1.22851	0.00303222		7.37468	7.37213	6.33453	6.02907	-2.51824
ENSG00000110906	KCTD10;KCTD10	-0.795593	0.00303435		9.2891	9.3626	8.66776	8.39256	-2.51793
ENSG00000049249	TNFRSF9;TNFRSF9	-0.858173	0.00306042		8.78034	9.12344	8.13568	8.08852	-2.51422
ENSG00000232388	SMIM26;SMIM26	-1.08703	0.00306213		7.75584	8.26789	7.05132	6.88375	-2.51398
ENSG00000124243	BCAS4;BCAS4	-0.831337	0.00316049		8.78408	8.90715	8.00717	8.04267	-2.50025
ENSG00000057252	SOAT1;SOAT1	-0.859653	0.00316082		8.87099	8.8723	7.85617	8.17181	-2.5002
ENSG00000119711	ALDH6A1;ALDH6A1	-1.18257	0.00317387		7.35471	7.57837	6.26128	6.3929	-2.49841
ENSG00000232220	;	-0.897961	0.00325531		9.58314	9.42538	8.90024	8.25859	-2.48741
ENSG00000160179	ABCG1;ABCG1	-0.961071	0.0033406		8.23143	8.09733	7.21543	7.23309	-2.47618
ENSG00000185920	PTCH1;PTCH1	-1.19722	0.00338966		8.23689	7.44771	6.70972	6.7532	-2.46984
ENSG00000131746	TNS4;TNS4	-0.907627	0.00347655		9.24368	8.79585	8.30196	7.95628	-2.45885
ENSG00000167925	GHDC;GHDC	-0.787083	0.00347886		9.48322	9.48554	8.86853	8.51513	-2.45856
ENSG00000144647	POMGNT2;C3orf39	-1.02973	0.00358212		8.25316	8.48846	7.63046	7.03191	-2.44586
ENSG00000120686	UFM1;UFM1	-0.997769	0.00358212		8.24234	8.55833	7.17612	7.64261	-2.44586
ENSG00000131876	SNRPA1;SNRPA1	-0.866094	0.00375705		8.5539	8.5138	7.67061	7.69097	-2.42515
ENSG00000171227	TMEM37;TMEM37	-2.01324	0.00376618		5.7598	6.45968	3.99861	4.66025	-2.4241
ENSG00000124313	IQSEC2;IQSEC2	-0.810618	0.00378353		9.18552	9.07659	8.47066	8.17181	-2.4221
ENSG00000173727	;	-1.18178	0.00392376		7.47057	7.39413	6.11927	6.45022	-2.4063
ENSG00000224383	PRR29;PRR29	-2.4415	0.00412789		5.63291	5.56317	3.92464	3.18722	-2.38427
ENSG00000267288	;	-0.897727	0.00418115		8.30611	8.42576	7.52801	7.43824	-2.3787
ENSG00000139318	DUSP6;DUSP6	-0.995529	0.00418838		7.92787	7.95656	6.89546	7.04126	-2.37795
ENSG00000227053	MUC12-AS1;	-1.9894	0.00424089		5.72911	6.25849	4.13608	4.39427	-2.37254
ENSG00000223803	RPS20P14;	-1.01546	0.00444722		7.80817	7.8571	6.88574	6.79804	-2.35191
ENSG00000134285	FKBP11;FKBP11	-0.892352	0.00448826		8.56263	8.79585	7.97546	7.60525	-2.34792
ENSG00000135519	KCNH3;KCNH3	-0.938772	0.00455563		8.18695	8.21325	7.39737	7.14904	-2.34145
ENSG00000142089	IFITM3;IFITM3	-1.10669	0.00458714		7.71726	7.69817	6.37675	6.85221	-2.33846
ENSG00000170456	DENND5B;DENND5B	-0.924195	0.00466629		8.72698	8.54364	7.45763	7.95628	-2.33103
ENSG00000129353	SLC44A2;SLC44A2	-0.950826	0.00472477		8.32676	8.34334	7.607	7.15767	-2.32562
ENSG00000112655	PTK7;PTK7	-1.5406	0.00496426		6.48448	6.97961	5.58327	4.96558	-2.30415
ENSG00000114779	ABHD14B;HEL-S-299	-0.870214	0.00504254		8.6916	8.68866	8.0161	7.61781	-2.29735
ENSG00000005882	PDK2;PDK2	-0.933865	0.0050552		8.26391	8.13047	7.39737	7.15767	-2.29626
ENSG00000226688	ENTPD1-AS1;	-1.36631	0.0050587		6.92454	6.80994	5.45775	5.69153	-2.29596
ENSG00000025434	NR1H3;NR1H3	-0.92893	0.0050587		8.35719	8.3546	7.63046	7.22491	-2.29596
ENSG00000101109	STK4;STK4	-0.809453	0.00509434		9.08305	9.04564	8.06857	8.43577	-2.29291
ENSG00000267432	DNAH17-AS1;	-1.88	0.00513201		6.34975	5.99614	4.06898	4.84254	-2.28971
ENSG00000173868	PHOSPHO1;PHOSPHO1	-2.72098	0.00532819		5.02298	5.5238	3.37738	3.04564	-2.27342
ENSG00000275074	NUDT18;NUDT18	-0.879933	0.00533679		8.72309	9.00333	8.20763	7.75492	-2.27272
ENSG00000204967	PCDHA4;PCDHA4	-1.68565	0.00541139		6.22331	6.30568	4.76396	4.70802	-2.26669
ENSG00000286444	;	-1.24399	0.00542427		7.71726	7.26874	6.60704	5.93181	-2.26566
ENSG00000115255	REEP6;REEP6	-1.06428	0.00542427		7.62024	7.64411	6.70972	6.47804	-2.26566
ENSG00000205220	PSMB10;PSMB10	-1.88857	0.00566467		6.20112	5.81227	4.43145	4.27244	-2.24683
ENSG00000181444	ZNF467;ZNF467	-1.15948	0.00570377		7.23966	7.6893	6.47072	6.23878	-2.24384
ENSG00000213445	SIPA1;SIPA1	-0.825854	0.00570377		8.70349	8.8406	8.08988	7.81069	-2.24384
ENSG00000268050	;	-0.80095	0.0057934		8.69557	8.88789	8.0294	7.97593	-2.23707
ENSG00000279504	;	-1.43901	0.00580481		6.59073	7.29236	5.84628	5.34381	-2.23621
ENSG00000111912	NCOA7;NCOA7	-0.84687	0.00580481		9.31516	9.46749	8.21928	8.82513	-2.23621
ENSG00000142166	IFNAR1;IFNAR1	-0.888334	0.00586859		8.50944	8.60152	7.45105	7.88012	-2.23147
ENSG00000183298	RPSAP19;	-1.34302	0.0059345		7.09068	8.42041	6.64208	6.54534	-2.22662
ENSG00000099998	GGT5;GGT5	-1.43577	0.00603173		6.91093	6.50082	5.32027	5.43181	-2.21956
ENSG00000101017	CD40;CD40	-1.31802	0.00609585		7.0036	6.87397	5.84628	5.51475	-2.21497
ENSG00000175155	YPEL2;YPEL2	-0.941735	0.00612364		7.93461	8.20082	7.14388	7.15767	-2.21299
ENSG00000267530	LINC01836;	-1.10415	0.00612908		7.64512	7.39413	6.58319	6.3179	-2.2126
ENSG00000087266	SH3BP2;SH3BP2	-0.786057	0.00612908		9.09213	8.95233	8.38015	8.09751	-2.2126
ENSG00000011376	LARS2;LARS2	-1.00188	0.00614152		8.09967	7.73311	6.86611	7.03191	-2.21172
ENSG00000115365	LANCL1;LANCL1	-0.976813	0.0062117		8.36219	8.49865	7.10254	7.76625	-2.20679
ENSG00000170477	KRT4;KRT4	-2.38044	0.00656825		5.41882	5.56317	3.26196	3.82956	-2.18255
ENSG00000167508	MVD;MVD	-0.866374	0.00666145		9.88061	9.812	9.32729	8.53514	-2.17643
ENSG00000133067	LGR6;LGR6	-1.21037	0.0069516		7.05401	7.48919	6.29103	5.93181	-2.15792
ENSG00000161618	ALDH16A1;ALDH16A1	-0.845952	0.00695249		9.07392	9.16881	8.54661	7.96122	-2.15786
ENSG00000185414	MRPL30;MRPL30	-0.852397	0.006958		8.49126	8.5288	7.82092	7.50061	-2.15752
ENSG00000126878	AIF1L;AIF1L	-1.6432	0.00698034		6.28791	6.2097	4.76396	4.75427	-2.15612
ENSG00000177989	ODF3B;ODF3B	-1.03843	0.00699747		7.59493	7.55902	6.60704	6.53213	-2.15506
ENSG00000273604	EPOP;EPOP	-0.804174	0.00716903		8.71528	8.82043	8.1067	7.82701	-2.14454
ENSG00000265962	GACAT2;	-1.81352	0.00736776		6.13241	6.13327	4.84641	4.06793	-2.13266
ENSG00000198794	SCAMP5;SCAMP5	-0.802291	0.00746596		8.60972	8.55345	7.83108	7.74922	-2.12691
ENSG00000197763	TXNRD3;	-1.37879	0.00776295		6.57356	6.95021	5.32027	5.6184	-2.10997
ENSG00000248223	;	-1.75195	0.00779083		5.93139	6.43866	4.32045	4.88473	-2.10842
ENSG00000254003	;	-0.96469	0.00783834		7.98744	7.75878	7.01613	6.85221	-2.10578
ENSG00000135114	OASL;OASL	-1.21591	0.00803388		6.99072	7.06438	5.8261	5.91155	-2.09507
ENSG00000103005	USB1;C16orf57	-0.800342	0.0080564		9.99468	9.48554	9.154	8.75293	-2.09386
ENSG00000142632	ARHGEF19;ARHGEF19	-1.0929	0.00824829		7.47982	7.44771	6.59516	6.18914	-2.08364
ENSG00000124664	SPDEF;SPDEF	-1.88744	0.00856432		5.87643	5.8762	4.37702	4.06793	-2.06731
ENSG00000268509	;	-1.11865	0.00872706		7.26127	7.4158	6.08572	6.42184	-2.05913
ENSG00000185745	IFIT1;IFIT1	-1.05743	0.00876528		7.46126	7.6163	6.6763	6.33321	-2.05723
ENSG00000184986	TMEM121;TMEM121	-1.20011	0.00878288		7.38456	8.26789	7.01613	6.34837	-2.05636
ENSG00000233328	PFN1P1;	-1.24591	0.00881211		7.2505	7.2203	5.60711	6.37821	-2.05492
ENSG00000197557	TTC30A;TTC30A	-1.43634	0.00883405		6.55618	6.70823	4.99838	5.54137	-2.05384
ENSG00000152669	CCNO;CCNO	-1.02784	0.00883835		7.489	7.57837	6.59516	6.47804	-2.05363
ENSG00000168890	TMEM150A;TMEM150A	-0.936972	0.00894842		7.91429	8.13701	7.26873	6.93485	-2.04825
ENSG00000163900	TMEM41A;TMEM41A	-0.882504	0.00894842		8.05086	8.27976	7.23086	7.37305	-2.04825
ENSG00000166920	C15orf48;C15orf48	-1.03896	0.00895446		7.4138	7.59746	6.45767	6.54534	-2.04796
ENSG00000240036	;	-1.25252	0.00919529		6.78229	7.26874	5.72076	5.9715	-2.03643
ENSG00000139410	SDSL;SDSL	-0.841462	0.00923961		8.50491	8.38239	7.76902	7.4453	-2.03435
ENSG00000104381	GDAP1;GDAP1	-1.05541	0.00954666		7.55174	7.75878	6.34874	6.87331	-2.02015
ENSG00000056558	TRAF1;TRAF1	-1.16418	0.0101408		6.97773	7.24472	6.05138	5.95179	-1.99393
ENSG00000213888	LINC01521;	-1.65526	0.0101424		6.20112	6.10687	4.84641	4.45154	-1.99386
ENSG00000111716	LDHB;LDHB	-1.30851	0.01019		7.01637	8.24991	6.16818	6.7532	-1.99182
ENSG00000140538	NTRK3;NTRK3	-0.82435	0.01019		8.51844	8.62497	7.93835	7.55388	-1.99182
ENSG00000107968	MAP3K8;MAP3K8	-0.90167	0.0105852		8.06322	8.02866	6.98917	7.32022	-1.9753
ENSG00000073969	NSF;NSF	-0.907664	0.01066		7.98744	8.19456	7.01613	7.37305	-1.97224
ENSG00000115514	TXNDC9;TXNDC9	-0.869205	0.0107576		8.07547	8.48334	7.42446	7.45234	-1.96829
ENSG00000197183	NOL4L;NOL4L	-0.888605	0.0107871		8.71136	8.20082	7.74772	7.4453	-1.9671
ENSG00000104953	TLE6;TLE6	-1.65165	0.0108589		6.15568	6.05256	4.53452	4.70802	-1.96421
ENSG00000149577	SIDT2;SIDT2	-0.918519	0.0109482		8.00676	7.76723	7.0072	6.98419	-1.96066
ENSG00000140465	CYP1A1;CYP1A1	-1.70088	0.011007		5.90417	6.1592	4.53452	4.50661	-1.95833
ENSG00000123505	AMD1;AMD1	-0.793531	0.01104		9.34077	9.79969	8.53423	9.02463	-1.95703
ENSG00000178385	PLEKHM3;PLEKHM3	-1.16413	0.0110767		7.12645	7.07804	5.80564	6.15507	-1.95559
ENSG00000241627	UBQLN4P1;	-2.11085	0.0111105		5.49377	5.77921	4.20019	3.43448	-1.95427
ENSG00000140691	ARMC5;ARMC5	-0.92009	0.0111151		7.90746	7.865	7.11091	6.85221	-1.95409
ENSG00000105642	KCNN1;KCNN1	-1.84209	0.0115429		5.63291	6.07997	4.37702	4.13937	-1.93769
ENSG00000166086	JAM3;JAM3	-1.24493	0.0115429		6.92454	6.74294	5.67637	5.64319	-1.93769
ENSG00000025708	TYMP;TYMP	-0.999156	0.0116314		7.87978	7.80056	7.13571	6.53213	-1.93437
ENSG00000132718	SYT11;SYT11	-1.47163	0.0116715		6.30882	6.48039	4.88593	5.18405	-1.93287
ENSG00000159110	IFNAR2;IFNAR2	-0.873679	0.0117532		8.26925	8.02866	7.42446	7.15767	-1.92984
ENSG00000231767	RPS27AP5;	-1.19278	0.0119999		6.95138	7.02262	5.67637	6.01013	-1.92082
ENSG00000198598	MMP17;MMP17	-1.0077	0.0120528		7.76343	7.97857	7.17612	6.53213	-1.91891
ENSG00000187630	DHRS4L2;DHRS4L2	-0.975785	0.0120531		7.72506	8.3988	7.24613	7.03191	-1.9189
ENSG00000141570	CBX8;CBX8	-0.785896	0.0123493		8.47285	8.37134	7.60108	7.6969	-1.90836
ENSG00000228672	PROB1;PROB1	-1.6317	0.0127963		6.52078	5.81227	4.80577	4.66025	-1.89291
ENSG00000137285	TUBB2B;TUBB2B	-1.36262	0.0127963		6.72122	6.56041	5.60711	5.07895	-1.89291
ENSG00000111679	PTPN6;PTPN6	-0.804493	0.0127963		8.74243	8.56804	8.05996	7.63645	-1.89291
ENSG00000132561	MATN2;MATN2	-1.14897	0.012843		7.0036	7.02262	5.94313	5.891	-1.89133
ENSG00000116661	FBXO2;FBXO2	-0.792004	0.0129762		8.36219	8.40423	7.68749	7.51412	-1.88685
ENSG00000086619	ERO1B;ERO1B	-0.933149	0.0130383		7.96127	8.20705	6.87596	7.424	-1.88478
ENSG00000164168	TMEM184C;TMEM184C	-0.966128	0.0131062		7.85156	7.95656	6.64208	7.22491	-1.88252
ENSG00000162729	IGSF8;IGSF8	-0.823854	0.0132053		8.74243	8.61094	8.1067	7.57336	-1.87925
ENSG00000107020	PLGRKT;PLGRKT	-0.924917	0.0133445		7.65331	7.88844	6.92421	6.81995	-1.8747
ENSG00000178026	LRRC75B;LRRC75B	-1.05142	0.0135415		7.17281	7.51953	6.34874	6.33321	-1.86833
ENSG00000104833	TUBB4A;TUBB4A	-1.73302	0.0136267		6.24517	6.02463	4.99838	3.99276	-1.86561
ENSG00000143512	HHIPL2;HHIPL2	-0.841534	0.0137409		8.21491	8.04266	7.39051	7.21667	-1.86198
ENSG00000187994	RINL;RINL	-1.00559	0.0138505		7.44246	7.40501	6.53429	6.36337	-1.85853
ENSG00000185339	TCN2;TCN2	-0.929395	0.0138505		7.80817	7.87286	7.11922	6.71863	-1.85853
ENSG00000108947	EFNB3;EFNB3	-1.66184	0.0140307		6.46599	5.71073	4.63072	4.66025	-1.85292
ENSG00000103154	NECAB2;NECAB2	-1.61	0.0142449		6.01009	6.2097	4.84641	4.45154	-1.84634
ENSG00000196544	BORCS6;BORCS6	-0.823227	0.0143606		8.65124	8.72818	8.13568	7.5604	-1.84283
ENSG00000100342	APOL1;APOL1	-0.865576	0.0143933		8.0384	7.88844	7.18407	7.05056	-1.84184
ENSG00000259985	;	-2.22488	0.0145846		4.91804	5.8762	3.76423	3.54385	-1.83611
ENSG00000107201	DDX58;DDX58	-1.03595	0.0147989		7.44246	7.34978	6.18412	6.58427	-1.82977
ENSG00000130303	BST2;BST2	-2.62377	0.0148927		5.02298	5.21322	2.67738	3.54385	-1.82703
ENSG00000130775	THEMIS2;THEMIS2	-2.2486	0.0152622		5.1208	5.67523	3.92464	3.18722	-1.81638
ENSG00000093144	ECHDC1;ECHDC1	-0.895198	0.0153327		7.7785	8.13701	7.19984	6.97446	-1.81438
ENSG00000140481	CCDC33;CCDC33	-1.07527	0.0155282		7.78597	7.13141	6.58319	6.3179	-1.80888
ENSG00000150593	PDCD4;PDCD4	-0.799004	0.0156776		8.49126	8.4364	7.46417	7.86439	-1.80472
ENSG00000113532	ST8SIA4;ST8SIA4	-1.40444	0.0160131		6.50274	6.25849	5.06876	5.11484	-1.79552
ENSG00000180767	CHST13;CHST13	-1.70157	0.0162311		5.78985	6.02463	4.53452	4.27244	-1.78965
ENSG00000176532	PRR15;LOC222171	-0.922805	0.0163171		7.56048	7.89617	6.86611	6.80904	-1.78736
ENSG00000267576	;	-1.32726	0.0163594		7.33446	6.65456	5.26138	6.15507	-1.78623
ENSG00000119917	IFIT3;IFIT3	-1.13017	0.0164201		7.07856	7.4158	5.8261	6.45022	-1.78463
ENSG00000197296	FITM2;FITM2	-0.907353	0.0164408		8.7766	8.23779	7.91466	7.29698	-1.78408
ENSG00000188163	FAM166A;FAM166A	-1.06266	0.0167297		7.33446	7.07804	6.29103	6.08442	-1.77651
ENSG00000145491	ROPN1L;ROPN1L	-1.82806	0.0168167		5.49377	5.96707	4.20019	4.13937	-1.77426
ENSG00000113273	ARSB;ARSB	-0.916657	0.0168167		7.81549	7.55902	6.80557	6.79804	-1.77426
ENSG00000186198	SLC51B;SLC51B	-2.16091	0.0168303		5.25613	5.44167	3.6768	3.54385	-1.77391
ENSG00000279170	TSTD3;TSTD3	-1.13387	0.0169702		6.93802	7.64411	6.03389	6.42184	-1.77031
ENSG00000166578	IQCD;IQCD	-2.15656	0.0170208		5.33977	5.35458	3.6768	3.54385	-1.76902
ENSG00000168246	UBTD2;UBTD2	-0.846029	0.0172656		7.97441	8.30901	7.44445	7.18325	-1.76282
ENSG00000259605	;	-0.806062	0.0176282		8.67961	8.58248	8.08988	7.52749	-1.75379
ENSG00000167103	PIP5KL1;PIP5KL1	-1.13254	0.0176782		7.10271	7.2203	6.36282	5.7151	-1.75256
ENSG00000142235	LMTK3;LMTK3	-0.838576	0.0177609		7.93461	7.9417	7.0686	7.16625	-1.75054
ENSG00000158106	RHPN1;RHPN1	-0.858652	0.0178609		8.53184	8.13047	7.71518	7.24933	-1.7481
ENSG00000123427	EEF1AKMT3;EEF1AKMT3	-1.05351	0.0179848		7.11463	7.18287	6.06865	6.20588	-1.74509
ENSG00000169169	CPT1C;CPT1C	-1.02365	0.0181004		7.40412	7.17018	6.19989	6.40744	-1.74231
ENSG00000140678	ITGAX;ITGAX	-1.21892	0.0182134		6.72122	6.84231	5.8261	5.40307	-1.73961
ENSG00000140259	MFAP1;MFAP1	-0.967789	0.018501		7.72506	8.18828	6.6763	7.31251	-1.73281
ENSG00000139531	SUOX;SUOX	-0.982638	0.0186487		7.31393	7.45819	6.53429	6.33321	-1.72935
ENSG00000056998	GYG2;GYG2	-0.782734	0.0201039		8.15844	8.19456	7.49005	7.32022	-1.69672
ENSG00000166387	PPFIBP2;PPFIBP2	-0.782018	0.0205462		8.11755	8.14352	7.39737	7.32789	-1.68727
ENSG00000175294	CATSPER1;CATSPER1	-1.27471	0.0206591		6.50274	6.63621	5.19999	5.54137	-1.68489
ENSG00000257809	;	-0.945391	0.0206834		7.83724	7.76723	7.16813	6.5188	-1.68438
ENSG00000260630	SNAI3-AS1;	-1.24382	0.0207761		6.50274	6.75998	5.58327	5.34381	-1.68244
ENSG00000241837	ATP5PO;ATP5PO	-1.04725	0.0210255		7.13818	7.8571	6.33453	6.69511	-1.67725
ENSG00000234009	RPL5P34;	-1.09551	0.0213395		7.06634	6.87397	5.84628	6.01013	-1.67081
ENSG00000143147	GPR161;GPR161	-0.817823	0.0213514		8.14106	7.95656	7.11922	7.37305	-1.67057
ENSG00000219507	FTH1P8;	-1.42801	0.0213873		6.06027	6.41733	4.99838	4.88473	-1.66984
ENSG00000161970	RPL26;RPL26	-0.970533	0.0216702		7.23966	7.66235	6.58319	6.4642	-1.66414
ENSG00000157870	PRXL2B;PRXL2B	-0.813034	0.0219631		8.45421	8.26192	7.7952	7.28127	-1.65831
ENSG00000130475	FCHO1;FCHO1	-0.854233	0.0224077		7.82278	7.6893	6.89546	6.95479	-1.6496
ENSG00000266903	;	-1.46118	0.0225058		6.34975	5.96707	4.80577	4.88473	-1.64771
ENSG00000131095	GFAP;GFAP	-0.881479	0.0228831		7.57781	7.65326	6.75311	6.76454	-1.64049
ENSG00000240771	ARHGEF25;ARHGEF25	-1.27131	0.0231202		6.65745	6.41733	5.50928	5.18405	-1.63601
ENSG00000118523	CCN2;CCN2	-0.904058	0.0231935		7.95465	7.52951	6.74238	7.00347	-1.63463
ENSG00000165698	SPACA9;SPACA9	-0.915412	0.0235664		7.62024	7.4686	6.78482	6.5188	-1.62771
ENSG00000226715	LINC01709;	-1.42452	0.0236042		5.93139	6.97961	5.34883	5.07895	-1.62701
ENSG00000160469	BRSK1;BRSK1	-1.0045	0.0238648		7.16136	7.23256	6.34874	6.10241	-1.62224
ENSG00000121542	SEC22A;SEC22A	-1.05342	0.0238755		6.89719	7.43715	6.16818	6.18914	-1.62205
ENSG00000004848	ARX;ARX	-1.46362	0.0244524		6.32943	5.93741	4.9244	4.70802	-1.61168
ENSG00000161243	FBXO27;FBXO27	-0.804969	0.0249348		8.10565	7.88844	7.29832	7.12284	-1.60319
ENSG00000116852	KIF21B;KIF21B	-1.0363	0.0252223		7.55174	7.31561	6.76376	6.01013	-1.59822
ENSG00000180921	FAM83H;FAM83H	-0.783467	0.0262666		10.6207	10.304	10.0899	9.1358	-1.5806
ENSG00000125971	DYNLRB1;DYNLRB1	-1.78972	0.0263468		5.25613	6.13327	3.99861	4.39427	-1.57927
ENSG00000250634	LINC01182;	-1.73247	0.0265523		5.49377	5.93741	4.43145	3.99276	-1.5759
ENSG00000186364	NUDT17;NUDT17	-0.916025	0.0267201		7.44246	7.40501	6.61881	6.45022	-1.57316
ENSG00000259773	;	-0.948658	0.0268808		7.28256	7.75878	6.45767	6.76454	-1.57056
ENSG00000161544	CYGB;GLNF	-1.82965	0.0270091		5.41882	5.93741	4.48391	3.6455	-1.56849
ENSG00000165879	FRAT1;FRAT1	-1.06365	0.0273655		6.82646	7.05059	5.90517	5.95179	-1.5628
ENSG00000006210	CX3CL1;CX3CL1	-2.38881	0.027369		5.21241	4.75024	3.26196	3.18722	-1.56274
ENSG00000253716	MINCR;	-1.20649	0.027485		6.59073	6.65456	5.26138	5.69153	-1.5609
ENSG00000163626	COX18;COX18	-0.80422	0.0277477		7.94132	7.93421	7.2836	7.00347	-1.55677
ENSG00000155792	DEPTOR;DEPTOR	-1.46662	0.028399		6.28791	5.84459	4.67651	4.84254	-1.5467
ENSG00000259006	;	-1.09084	0.0284449		6.79717	6.9202	5.94313	5.69153	-1.546
ENSG00000283959	;	-0.919467	0.0292388		7.31393	7.45819	6.59516	6.3929	-1.53404
ENSG00000285441	;	-1.07238	0.0294891		6.85517	6.90495	5.74245	5.9715	-1.53034
ENSG00000285230	RALY-AS1;	-1.43585	0.0295777		5.90417	6.28228	4.7209	4.88473	-1.52904
ENSG00000157368	IL34;MGC34647	-1.82327	0.0299141		5.33977	5.8762	3.6768	4.39427	-1.52412
ENSG00000184182	UBE2F;UBE2F	-1.06529	0.0299141		6.82646	6.95021	5.96175	5.7836	-1.52412
ENSG00000260111	;	-0.962249	0.0299767		7.63687	7.2806	6.77432	6.25496	-1.52322
ENSG00000148803	FUOM;FUOM	-0.781269	0.0305013		8.11161	8.30901	7.64781	7.20839	-1.51568
ENSG00000184110	EIF3C;EIF3S8	-1.11683	0.030633		7.09068	8.5138	6.74238	7.00347	-1.51381
ENSG00000183250	LINC01547;	-0.79104	0.0310461		7.98744	7.82507	7.22317	7.04126	-1.50799
ENSG00000153823	PID1;PID1	-1.63923	0.0311123		5.72911	5.71073	4.37702	4.20744	-1.50707
ENSG00000049769	PPP1R3F;PPP1R3F	-0.911445	0.0311389		7.30355	7.74172	6.76376	6.53213	-1.5067
ENSG00000151117	TMEM86A;TMEM86A	-1.51971	0.0313851		6.06027	5.77921	4.43145	4.70802	-1.50328
ENSG00000158457	TSPAN33;TSPAN33	-0.927649	0.0314646		7.34462	7.73311	6.8562	6.40744	-1.50218
ENSG00000105519	CAPS;CAPS	-1.22282	0.0319802		6.34975	6.57973	5.40432	5.25009	-1.49512
ENSG00000235912	;	-2.14839	0.0324245		5.21241	5.05649	3.26196	3.6455	-1.48913
ENSG00000226360	RPL10AP6;	-1.195	0.0324245		6.34975	7.10497	5.78488	5.48763	-1.48913
ENSG00000162366	PDZK1IP1;PDZK1IP1	-0.843883	0.0324245		7.50721	7.75027	6.83616	6.78696	-1.48913
ENSG00000259954	IL21R-AS1;	-2.15341	0.032716		5.29855	4.94167	3.58373	3.31614	-1.48524
ENSG00000122507	BBS9;B1	-1.0861	0.033265		6.78229	6.79348	5.8858	5.6184	-1.47801
ENSG00000162645	GBP2;GBP2	-1.72227	0.0337305		5.29855	6.39568	3.92464	4.79908	-1.47198
ENSG00000008277	ADAM22;ADAM22	-2.16795	0.0340137		4.74475	5.6015	3.1365	3.82956	-1.46835
ENSG00000232187	FTH1P7;	-1.55902	0.0340878		5.72911	5.99614	4.7209	4.20744	-1.4674
ENSG00000099958	DERL3;DERL3	-1.0251	0.0345423		6.85517	6.99409	5.8858	6.01013	-1.46165
ENSG00000265808	SEC22B;SEC22B	-0.892848	0.0348284		7.35471	7.76723	6.53429	6.8628	-1.45807
ENSG00000244380	;	-0.96229	0.0349743		7.59493	8.62031	6.9709	7.48698	-1.45625
ENSG00000259709	;	-0.906153	0.0354557		7.66146	7.64411	7.0686	6.3929	-1.45031
ENSG00000153982	GDPD1;GDPD1	-1.18045	0.0358854		6.48448	6.70823	5.72076	5.21745	-1.44508
ENSG00000102003	SYP;SYP	-1.31298	0.0358935		6.15568	6.72569	5.55902	4.84254	-1.44498
ENSG00000244468	;	-1.85962	0.0360777		5.29855	5.44167	3.84666	3.82956	-1.44276
ENSG00000269888	;	-1.67804	0.0363714		5.25613	6.07997	4.26157	4.27244	-1.43924
ENSG00000081307	UBA5;UBA5	-0.792312	0.0363714		7.81549	7.95656	6.93367	7.27335	-1.43924
ENSG00000167535	CACNB3;CACNB3	-0.785535	0.0366018		7.93461	7.784	6.96169	7.21667	-1.4365
ENSG00000210140	MT-TC;	-1.56965	0.0368534		5.87643	5.81227	4.76396	4.06793	-1.43352
ENSG00000176428	VPS37D;VPS37D	-0.823657	0.0368534		7.57781	7.784	6.99821	6.7532	-1.43352
ENSG00000077092	RARB;NR1B2	-0.80387	0.0368548		7.78597	7.784	6.82604	7.15767	-1.43351
ENSG00000186806	VSIG10L;VSIG10L	-0.879185	0.0371791		7.96786	7.37213	6.94307	6.74177	-1.4297
ENSG00000154529	CNTNAP3B;CNTNAP3B	-1.08805	0.0372402		7.39437	7.29236	5.63057	6.7532	-1.42899
ENSG00000067840	PDZD4;PDZD4	-1.01563	0.0373105		6.86931	7.06438	6.15206	5.82752	-1.42817
ENSG00000138185	ENTPD1;ENTPD1	-1.1715	0.0376066		6.44725	6.52095	5.32027	5.45999	-1.42474
ENSG00000130768	SMPDL3B;SMPDL3B	-1.11026	0.0388191		6.55618	6.72569	5.69873	5.48763	-1.41095
ENSG00000254285	KRT8P3;	-1.18621	0.0394826		6.34975	6.52095	5.26138	5.40307	-1.40359
ENSG00000187091	PLCD1;PLCD1	-0.94253	0.0405447		7.39437	7.00842	6.41778	6.18914	-1.39207
ENSG00000108443	RPS6KB1;RPS6KB1	-0.790092	0.0407764		7.87278	7.6893	6.87596	7.14036	-1.38959
ENSG00000065717	TLE2;TLE2	-0.9958	0.0409944		7.26127	6.9202	6.36282	5.891	-1.38728
ENSG00000112183	RBM24;RBM24	-0.79411	0.0412185		7.80081	7.65326	7.0686	6.83079	-1.38491
ENSG00000130772	MED18;MED18	-0.850764	0.0414259		7.94132	7.97857	7.45763	6.69511	-1.38273
ENSG00000272482	;	-1.24395	0.0416884		6.38954	6.2097	5.29112	5.00437	-1.37998
ENSG00000186787	SPIN2B;SPIN2B	-1.87845	0.0418532		5.02298	5.6015	3.6768	3.91347	-1.37827
ENSG00000105357	MYH14;MYH14	-1.00421	0.0420347		6.79717	7.03667	6.06865	5.84899	-1.37639
ENSG00000106789	CORO2A;CORO2A	-1.19269	0.0427055		6.86931	6.1592	5.48374	5.40307	-1.36952
ENSG00000181577	C6orf223;C6orf223	-1.30174	0.0430999		6.06027	6.30568	5.16828	4.79908	-1.36552
ENSG00000096060	FKBP5;FKBP5	-1.04908	0.0434576		6.81189	6.77683	5.58327	5.99095	-1.36193
ENSG00000185561	TLCD2;TLCD2	-0.918622	0.0435965		8.04464	7.54925	7.26873	6.4642	-1.36055
ENSG00000259674	;	-1.2898	0.0437552		6.2667	6.18467	4.76396	5.28201	-1.35897
ENSG00000177103	DSCAML1;DSCAML1	-1.95081	0.0440213		5.45678	4.94167	3.76423	3.54385	-1.35634
ENSG00000138111	MFSD13A;MFSD13A	-0.969731	0.0441601		7.06634	6.85823	6.03389	6.04776	-1.35497
ENSG00000105376	ICAM5;ICAM5	-1.85929	0.0443512		5.25613	5.63884	4.32045	3.31614	-1.35309
ENSG00000144802	NFKBIZ;NFKBIZ	-0.843304	0.0458033		7.47057	7.49937	6.47072	6.84154	-1.3391
ENSG00000254756	;	-1.01442	0.046858		7.18416	6.87397	6.34874	5.7151	-1.32922
ENSG00000171303	KCNK3;KCNK3	-0.887696	0.0471321		7.12645	7.56873	6.60704	6.3929	-1.32668
ENSG00000169583	CLIC3;CLIC3	-1.80767	0.0473323		5.07272	5.63884	3.6768	4.06793	-1.32484
ENSG00000220749	RPL21P28;	-1.1907	0.0474246		6.36978	7.90386	5.99827	6.34837	-1.324
ENSG00000177181	RIMKLA;RIMKLA	-1.19858	0.0475893		6.44725	6.32872	4.99838	5.51475	-1.32249
ENSG00000232434	AJM1;AJM1	-0.970679	0.0475893		6.97773	6.87397	6.1026	5.891	-1.32249
ENSG00000102078	SLC25A14;SLC25A14	-0.845437	0.0475893		7.30355	7.42652	6.47072	6.62217	-1.32249
ENSG00000116138	DNAJC16;DNAJC16	-0.781652	0.0475893		7.89368	7.87286	6.84621	7.35064	-1.32249
ENSG00000101197	BIRC7;BIRC7	-1.10704	0.0485989		6.38954	6.97961	5.84628	5.45999	-1.31337
ENSG00000234311	;	-1.65612	0.0491018		5.21241	5.96707	3.92464	4.45154	-1.3089
ENSG00000164010	ERMAP;ERMAP	-0.834544	0.0491507		7.4138	7.48919	6.47072	6.79804	-1.30847
ENSG00000168306	ACOX2;ACOX2	-1.18009	0.0493424		6.62448	6.45968	4.99838	5.7836	-1.30678
ENSG00000180155	LYNX1;LYNX1	-1.32101	0.0494964		5.93139	6.2343	4.67651	5.07895	-1.30543
ENSG00000261359	PYCARD-AS1;	-0.855727	0.0498924		7.23966	7.29236	6.44449	6.4361	-1.30197
ENSG00000181264	TLCD5;TLCD5	-0.793654	0.0505376		7.46126	7.62563	6.81584	6.73025	-1.29639
ENSG00000166136	NDUFB8;NDUFB8	-1.87693	0.0507379		4.91804	5.56317	3.92464	3.54385	-1.29467
ENSG00000108932	SLC16A6;SLC16A6	-1.5561	0.0510213		5.98433	5.96707	3.76423	5.11484	-1.29225
ENSG00000131409	LRRC4B;LRRC4B	-1.66739	0.0513243		6.13241	5.00023	4.13608	4.33464	-1.28968
ENSG00000187266	EPOR;EPOR	-0.84107	0.0521789		7.23966	7.62563	6.53429	6.71863	-1.28251
ENSG00000182179	UBA7;UBA7	-1.70179	0.0523631		5.1208	5.74538	4.13608	3.91347	-1.28097
ENSG00000138378	STAT4;STAT4	-0.998767	0.0525881		6.62448	7.2806	5.98012	6.08442	-1.27911
ENSG00000167733	HSD11B1L;HSD11B1L	-1.10707	0.0528619		6.46599	6.54081	5.63057	5.28201	-1.27686
ENSG00000102879	CORO1A;CORO1A	-1.86086	0.0538757		5.21241	5.21322	3.48424	3.91347	-1.26861
ENSG00000087299	L2HGDH;L2HGDH	-1.08304	0.0546594		7.17281	6.52095	5.48374	6.15507	-1.26233
ENSG00000212664	;	-1.69051	0.057596		5.33977	5.39878	3.84666	4.06793	-1.23961
ENSG00000139269	INHBE;INHBE	-1.04912	0.0578897		6.73674	6.61763	5.92427	5.40307	-1.2374
ENSG00000100033	PRODH;PRODH	-1.61699	0.0587564		5.29855	5.63884	3.99861	4.20744	-1.23094
ENSG00000158315	RHBDL2;RHBDL2	-1.45704	0.060046		5.63291	5.74538	4.32045	4.50661	-1.22152
ENSG00000286623	;	-1.44936	0.0603461		5.81929	5.8762	4.9244	4.06793	-1.21935
ENSG00000116885	OSCP1;OSCP1	-0.978409	0.060577		6.73674	6.72569	5.84628	5.76113	-1.21769
ENSG00000261652	C15orf65;C15orf65	-1.44613	0.0607628		5.56502	5.84459	4.37702	4.50661	-1.21636
ENSG00000223361	FTH1P10;	-1.29203	0.0611833		5.87643	6.52095	4.63072	5.37374	-1.21337
ENSG00000165376	CLDN2;CLDN2	-0.916467	0.0612498		7.47057	6.99409	6.06865	6.62217	-1.2129
ENSG00000101888	NXT2;NXT2	-0.996687	0.0619077		6.81189	7.10497	5.60711	6.33321	-1.20826
ENSG00000104883	PEX11G;PEX11G	-1.14055	0.0619776		6.52078	6.2343	5.53437	5.07895	-1.20777
ENSG00000269176	;	-0.837576	0.0632751		7.12645	7.26874	6.39056	6.3929	-1.19877
ENSG00000117114	ADGRL2;ADGRL2	-1.11695	0.0635319		6.32943	6.35138	5.19999	5.40307	-1.19701
ENSG00000099365	STX1B;STX1B	-1.44503	0.0639902		6.13241	5.35458	4.48391	4.55966	-1.19389
ENSG00000273143	;	-0.924756	0.0644611		6.73674	7.23256	6.15206	6.08442	-1.1907
ENSG00000166825	ANPEP;ANPEP	-1.14778	0.0656419		6.81189	6.05256	5.58327	5.21745	-1.18282
ENSG00000234235	BOK-AS1;	-1.64306	0.0661616		5.25613	5.48332	3.84666	4.13937	-1.17939
ENSG00000228626	;	-1.85077	0.0668697		5.29855	4.94167	3.84666	3.43448	-1.17477
ENSG00000259342	;	-0.816602	0.0676465		7.18416	7.53941	6.44449	6.70692	-1.16975
ENSG00000227615	;	-0.838671	0.0677675		7.12645	7.82507	6.75311	6.6469	-1.16898
ENSG00000185880	TRIM69;TRIM69	-0.823292	0.0677868		7.38456	7.13141	6.37675	6.55844	-1.16885
ENSG00000154096	THY1;THY1	-1.26972	0.0695285		5.90417	6.02463	4.96186	4.66025	-1.15784
ENSG00000182890	GLUD2;GLUD2	-1.46569	0.0699525		5.69775	5.48332	4.37702	4.27244	-1.1552
ENSG00000184056	VPS33B;VPS33B	-1.88469	0.0712551		4.68204	5.5238	3.92464	3.31614	-1.14718
ENSG00000184227	ACOT1;ACOT1	-0.992948	0.0715743		6.44725	6.84231	5.67637	5.76113	-1.14524
ENSG00000255198	SNHG9;	-1.52035	0.0718775		5.25613	5.77921	4.32045	4.13937	-1.14341
ENSG00000113924	HGD;HGD	-1.01533	0.0729567		6.65745	6.41733	5.50928	5.66756	-1.13693
ENSG00000280187	;	-1.17149	0.0730228		6.38954	5.93741	5.13587	5.07895	-1.13654
ENSG00000184584	STING1;STING1	-1.90419	0.0730464		4.74475	5.30898	3.76423	3.31614	-1.1364
ENSG00000105668	UPK1A;UPK1A	-1.47143	0.0747394		5.41882	5.77921	4.06898	4.55966	-1.12645
ENSG00000104760	FGL1;FGL1	-0.807765	0.0751755		7.19544	7.2203	6.33453	6.5188	-1.12392
ENSG00000151366	NDUFC2;NDUFC2	-1.0506	0.0752078		6.24517	7.02262	5.84628	5.51475	-1.12374
ENSG00000137267	TUBB2A;TUBB2A	-1.15369	0.0752921		6.2667	6.05256	5.19999	5.00437	-1.12325
ENSG00000130487	KLHDC7B;KLHDC7B	-1.37002	0.0755559		6.22331	5.56317	5.034	4.27244	-1.12173
ENSG00000165169	DYNLT3;DYNLT3	-1.04671	0.0757955		6.24517	6.82622	5.43128	5.7151	-1.12036
ENSG00000154217	PITPNC1;PITPNC1	-0.835873	0.0775354		7.02902	7.07804	6.21548	6.28677	-1.1105
ENSG00000107159	CA9;CA9	-0.874235	0.0777565		7.62024	7.68037	6.18412	7.23309	-1.10926
ENSG00000175482	POLD4;POLD4	-0.8976	0.0778544		6.89719	6.77683	6.03389	5.93181	-1.10872
ENSG00000145882	PCYOX1L;PCYOX1L	-0.781746	0.0794013		7.31393	7.26874	6.41778	6.6469	-1.10017
ENSG00000205277	MUC12;MUC12	-1.20725	0.0794974		5.7598	6.35138	4.96186	5.00437	-1.09965
ENSG00000180739	S1PR5;S1PR5	-1.47013	0.0796424		5.25613	5.8762	4.48391	4.13937	-1.09886
ENSG00000204044	SLC12A5-AS1;	-1.37678	0.0796424		5.84815	5.71073	4.88593	4.13937	-1.09886
ENSG00000162040	HS3ST6;HS3ST6	-1.17439	0.0796424		6.08472	6.05256	5.1027	4.88473	-1.09886
ENSG00000079337	RAPGEF3;RAPGEF3	-1.53792	0.0809788		5.25613	5.6015	4.32045	3.91347	-1.09163
ENSG00000116128	BCL9;BCL9	-0.825586	0.0816066		7.45189	7.06438	6.66498	6.25496	-1.08827
ENSG00000123965	PMS2P5;	-1.36806	0.0820727		5.45678	5.90713	4.48391	4.50661	-1.0858
ENSG00000268858	;	-0.870623	0.0823849		7.44246	7.10497	6.76376	6.02907	-1.08415
ENSG00000136244	IL6;IL6	-0.969947	0.083018		6.48448	6.97961	6.03389	5.59318	-1.08083
ENSG00000156162	DPY19L4;DPY19L4	-0.805877	0.0831654		7.22873	7.6349	6.37675	6.90441	-1.08006
ENSG00000240972	MIF;MIF	-1.51288	0.0837238		5.66569	5.44167	4.63072	3.74046	-1.07715
ENSG00000227496	;	-1.77564	0.0840721		4.86256	5.2619	3.58373	3.74046	-1.07535
ENSG00000016391	CHDH;CHDH	-0.823124	0.0852248		7.56917	6.95021	6.53429	6.4642	-1.06943
ENSG00000251365	LINC02236;	-0.911038	0.0852285		6.85517	6.61763	5.8858	5.87015	-1.06942
ENSG00000160323	ADAMTS13;ADAMTS13	-1.44306	0.0856647		5.56502	5.44167	4.32045	4.20744	-1.0672
ENSG00000172197	MBOAT1;MBOAT1	-0.886476	0.0859565		6.86931	6.74294	6.03389	5.891	-1.06572
ENSG00000272916	;NDST2	-1.82119	0.0861188		4.86256	5.30898	3.99861	3.18722	-1.0649
ENSG00000221843	C2orf16;C2orf16	-1.39342	0.086766		5.69775	5.63884	4.06898	4.75427	-1.06165
ENSG00000183260	ABHD16B;ABHD16B	-0.971202	0.0873086		6.88332	6.35138	5.80564	5.64319	-1.05894
ENSG00000099308	MAST3;MAST3	-1.07863	0.0878119		6.20112	6.2343	5.29112	5.14986	-1.05645
ENSG00000279407	;	-1.16196	0.0890805		6.20112	6.05256	5.34883	4.70802	-1.05022
ENSG00000026297	RNASET2;RNASET2	-0.846276	0.0894925		7.11463	6.99409	6.47072	5.9715	-1.04821
ENSG00000100003	SEC14L2;SEC14L2	-0.983225	0.0895572		6.62448	6.35138	5.65365	5.48763	-1.0479
ENSG00000197180	;	-1.11304	0.0895953		6.15568	6.25849	4.88593	5.43181	-1.04771
ENSG00000174886	NDUFA11;NDUFA11	-1.33729	0.089853		5.45678	5.99614	4.76396	4.33464	-1.04647
ENSG00000274425	;	-0.811845	0.0898757		7.42342	7.00842	6.61881	6.25496	-1.04636
ENSG00000269956	MKNK1-AS1;	-1.09162	0.0920223		6.08472	6.2343	5.23101	5.07895	-1.03611
ENSG00000145358	DDIT4L;DDIT4L	-1.48988	0.0928382		5.52983	5.44167	3.76423	4.55966	-1.03227
ENSG00000225946	NA	-1.67063	0.0934537		5.1208	5.2619	4.13608	3.43448	-1.0294
ENSG00000171984	SHLD1;SHLD1	-0.9341	0.0937225		6.42827	7.10497	6.01619	5.80573	-1.02816
ENSG00000131378	RFTN1;RFTN1	-0.838807	0.093862		7.06634	6.79348	6.18412	6.08442	-1.02751
ENSG00000117472	TSPAN1;TSPAN1	-1.06847	0.094481		6.32943	6.07997	5.16828	5.28201	-1.02466
ENSG00000104140	RHOV;RHOV	-0.868113	0.0956594		6.93802	6.74294	5.84628	6.17221	-1.01927
ENSG00000171798	KNDC1;KNDC1	-0.886891	0.0967127		6.88332	6.75998	6.19989	5.7151	-1.01452
ENSG00000255177	MUC5B-AS1;	-1.82524	0.0970532		5.37984	4.75024	4.06898	3.04564	-1.01299
ENSG00000232871	SEC1P;	-1.18096	0.0971238		5.69775	6.2097	4.9244	4.88473	-1.01267
ENSG00000286999	;	-1.12749	0.0971628		6.08472	5.96707	4.99838	5.00437	-1.0125
ENSG00000105639	JAK3;JAK3	-1.23736	0.0975478		6.0354	5.81227	5.13587	4.39427	-1.01078
ENSG00000143543	JTB;JTB	-1.04994	0.0976582		6.01009	6.88955	5.37684	5.66756	-1.01029
ENSG00000226526	;	-1.07772	0.0982368		6.0354	6.25849	5.13587	5.18405	-1.00773
ENSG00000279088	;	-1.21772	0.0989658		5.93139	5.71073	4.7209	4.75427	-1.00451
ENSG00000204052	LRRC73;LRRC73	-1.29348	0.0995965		5.81929	5.67523	4.26157	4.88473	-1.00176
ENSG00000197405	C5AR1;C5AR1	-0.996927	0.100021		6.42827	6.25849	5.37684	5.45999	-0.99991
ENSG00000099957	P2RX6;P2RX6	-1.48753	0.100113		5.49377	5.21322	3.92464	4.27244	-0.99951
ENSG00000221916	C19orf73;C19orf73	-1.55743	0.100141		5.52983	5.35458	4.58342	3.43448	-0.999388
ENSG00000272056	;	-0.917093	0.101153		6.92454	7.2806	5.65365	6.6469	-0.995023
ENSG00000117266	CDK18;CDK18	-1.17335	0.102086		6.40904	5.84459	5.43128	4.61083	-0.991033
ENSG00000277688	;	-1.26573	0.102236		5.9581	5.74538	4.26157	5.07895	-0.990397
ENSG00000169213	RAB3B;RAB3B	-0.938354	0.102236		6.57356	6.43866	5.53437	5.7151	-0.990397
ENSG00000228021	;	-1.18915	0.102546		5.81929	5.8762	4.76396	4.79908	-0.989083
ENSG00000108852	MPP2;MPP2	-0.863408	0.103439		6.97773	6.85823	6.36282	5.76113	-0.985315
ENSG00000213904	LIPE-AS1;	-0.866209	0.104122		6.65745	6.82622	5.80564	6.02907	-0.982458
ENSG00000119138	KLF9;KLF9	-0.908282	0.105511		6.65745	6.70823	5.53437	6.06621	-0.976702
ENSG00000116711	PLA2G4A;PLA2G4A	-0.785724	0.105511		7.45189	8.0634	6.55895	7.37305	-0.976702
ENSG00000137440	FGFBP1;FGFBP1	-0.950854	0.10581		6.34975	6.61763	5.74245	5.43181	-0.975474
ENSG00000132749	TESMIN;TESMIN	-1.19551	0.106144		5.98433	5.74538	4.99838	4.55966	-0.974103
ENSG00000106733	NMRK1;NMRK1	-0.830358	0.106186		6.96461	6.93528	6.37675	5.891	-0.973933
ENSG00000269194	;	-0.804547	0.108378		6.96461	6.85823	6.19989	6.08442	-0.965057
ENSG00000256806	C17orf100;C17orf100	-0.914768	0.108768		6.48448	6.56041	5.58327	5.7383	-0.963499
ENSG00000228232	GAPDHP1;	-0.917602	0.108915		6.65745	6.54081	5.48374	5.95179	-0.962912
ENSG00000260077	;	-1.36262	0.109781		5.1208	5.96707	4.37702	4.45154	-0.959473
ENSG00000249196	TMEM132D-AS1;	-1.27667	0.109781		5.56502	5.71073	4.63072	4.39427	-0.959473
ENSG00000124615	MOCS1;MOCS1	-1.16245	0.11021		6.0354	5.81227	5.1027	4.61083	-0.957781
ENSG00000231789	PIK3CD-AS2;	-0.881798	0.11021		6.91093	6.79348	6.32017	5.6184	-0.957781
ENSG00000233728	;	-0.835684	0.112254		6.96461	6.72569	6.21548	5.87015	-0.949796
ENSG00000187231	SESTD1;SESTD1	-1.06267	0.113774		6.20112	6.69056	4.88593	5.891	-0.943956
ENSG00000124249	KCNK15;	-0.81937	0.113829		7.06634	6.70823	6.21548	6.01013	-0.943748
ENSG00000064309	CDON;CDON	-1.07476	0.114207		6.38954	5.90713	4.9244	5.40307	-0.942306
ENSG00000066185	ZMYND12;ZMYND12	-1.72425	0.114342		5.02298	5.05649	3.1365	4.06793	-0.941793
ENSG00000187650	VMAC;VMAC	-1.29777	0.11586		5.37984	5.74538	4.43145	4.45154	-0.936068
ENSG00000169026	SLC49A3;SLC49A3	-1.06491	0.116728		5.98433	6.41733	5.50928	4.88473	-0.932825
ENSG00000129084	PSMA1;PSMA1	-0.841037	0.116808		6.81189	7.75027	6.27623	6.76454	-0.932528
ENSG00000145703	IQGAP2;IQGAP2	-1.2378	0.118562		5.81929	5.84459	4.20019	5.11484	-0.926053
ENSG00000219438	TAFA5;TAFA5	-0.900025	0.118603		6.67366	6.43866	5.86618	5.54137	-0.925904
ENSG00000267106	ZNF561-AS1;	-1.0095	0.120056		6.10876	6.3737	5.50928	5.07895	-0.920617
ENSG00000165949	IFI27;IFI27	-0.941056	0.120556		7.19544	6.18467	5.94313	5.82752	-0.91881
ENSG00000100116	GCAT;GCAT	-1.31568	0.120922		5.52983	5.6015	4.06898	4.70802	-0.917495
ENSG00000162624	LHX8;LHX8	-0.788749	0.122259		6.76727	7.02262	6.13576	6.15507	-0.912719
ENSG00000069974	RAB27A;RAB27A	-0.85904	0.122481		6.89719	6.48039	5.78488	5.99095	-0.911931
ENSG00000279233	;	-1.72592	0.123356		4.97146	5.05649	4.06898	3.04564	-0.908838
ENSG00000143994	ABHD1;ABHD1	-0.883691	0.124027		6.53858	6.52095	5.58327	5.80573	-0.906485
ENSG00000050438	SLC4A8;SLC4A8	-1.28277	0.124131		5.52983	5.5238	4.43145	4.39427	-0.906119
ENSG00000111261	MANSC1;MANSC1	-0.860273	0.125415		6.72122	6.48039	5.8261	5.76113	-0.901649
ENSG00000132825	PPP1R3D;PPP1R3D	-0.835461	0.126059		6.73674	6.63621	5.99827	5.7836	-0.899425
ENSG00000104490	NCALD;NCALD	-1.04301	0.126087		6.13241	5.99614	4.96186	5.25009	-0.899331
ENSG00000162738	VANGL2;VANGL2	-1.00095	0.127249		6.36978	6.07997	5.06876	5.51475	-0.895347
ENSG00000168079	SCARA5;SCARA5	-1.03391	0.127464		6.36978	5.8762	5.06876	5.31324	-0.894611
ENSG00000236439	;	-0.970288	0.127963		6.0354	6.56041	5.45775	5.37374	-0.892916
ENSG00000213862	;	-0.879225	0.12875		7.27196	6.39568	6.21548	5.891	-0.890254
ENSG00000287287	;	-1.31999	0.128925		5.81929	5.2619	4.06898	4.70802	-0.889661
ENSG00000126500	;	-1.274	0.131265		5.63291	5.39878	4.32045	4.50661	-0.881852
ENSG00000188613	NANOS1;NANOS1	-0.988641	0.134737		6.36978	5.99614	5.40432	5.14986	-0.870514
ENSG00000187775	DNAH17;DNAH17	-0.870322	0.136054		6.65745	6.3737	5.78488	5.6184	-0.866288
ENSG00000182379	NXPH4;NXPH4	-0.947446	0.136645		6.59073	6.32872	5.90517	5.14986	-0.864408
ENSG00000241431	RPL37P6;	-1.19224	0.137034		5.56502	5.90713	4.96186	4.33464	-0.863173
ENSG00000230663	FAM224B;	-2.25459	0.137821		2.65102	5.84459	2.99908	3.54385	-0.860685
ENSG00000142347	MYO1F;MYO1F	-1.25739	0.138659		5.49377	5.77921	4.88593	4.06793	-0.858052
ENSG00000288044	;	-1.06367	0.140396		5.81929	6.02463	5.06876	4.84254	-0.852644
ENSG00000184454	NCMAP;NCMAP	-1.47933	0.140675		5.56502	4.75024	4.13608	3.82956	-0.851783
ENSG00000180884	ZNF792;ZNF792	-1.02699	0.141492		5.90417	6.10687	5.16828	4.96558	-0.849269
ENSG00000254693	;	-1.25135	0.142286		5.63291	5.74538	4.99838	3.99276	-0.846839
ENSG00000176595	KBTBD11;KBTBD11	-0.810821	0.142463		6.95138	6.75998	6.36282	5.7383	-0.846298
ENSG00000135722	FBXL8;FBXL8	-1.29616	0.142919		5.1208	5.90713	4.67651	4.13937	-0.844909
ENSG00000186889	TMEM17;TMEM17	-0.952777	0.143491		5.9581	6.63621	5.40432	5.48763	-0.843175
ENSG00000228502	EEF1A1P11;	-1.66138	0.144754		5.25613	4.44767	3.58373	3.6455	-0.83937
ENSG00000196208	GREB1;GREB1	-0.897221	0.145293		6.2667	6.52095	5.72076	5.37374	-0.837755
ENSG00000145198	VWA5B2;VWA5B2	-1.32912	0.146985		5.49377	5.21322	4.43145	3.99276	-0.832727
ENSG00000198744	MTCO3P12;	-1.20063	0.14723		10.374	9.2159	8.87836	8.53182	-0.832005
ENSG00000186767	SPIN4;SPIN4	-1.14834	0.147383		5.7598	5.67523	4.43145	4.92572	-0.831552
ENSG00000248866	USP46-AS1;	-1.67687	0.149569		4.39974	5.21322	3.58373	3.54385	-0.82516
ENSG00000125510	OPRL1;OPRL1	-0.943645	0.149569		6.30882	6.05256	5.37684	5.25009	-0.82516
ENSG00000234618	RPSAP9;	-0.989251	0.150575		5.87643	6.39568	5.034	5.43181	-0.822246
ENSG00000188185	LINC00265;	-1.24732	0.150744		5.49377	5.48332	4.63072	4.13937	-0.82176
ENSG00000123838	C4BPA;C4BPA	-1.29481	0.152446		5.37984	5.35458	4.43145	4.06793	-0.816885
ENSG00000139190	VAMP1;VAMP1	-0.955184	0.152548		6.15568	6.1592	5.06876	5.45999	-0.816592
ENSG00000164976	MYORG;MYORG	-0.791566	0.152676		6.95138	6.67267	5.78488	6.30242	-0.81623
ENSG00000240376	;	-1.05893	0.152879		5.78985	6.10687	5.26138	4.66025	-0.815652
ENSG00000132386	SERPINF1;SERPINF1	-1.19498	0.154723		5.66569	5.39878	4.43145	4.55966	-0.810446
ENSG00000246203	;	-0.874339	0.157561		6.22331	6.77683	5.45775	5.91155	-0.802551
ENSG00000162927	PUS10;PUS10	-0.964876	0.159081		5.90417	6.2343	5.23101	5.14986	-0.798381
ENSG00000243279	PRAF2;PRAF2	-0.967729	0.159266		5.78985	6.84231	5.37684	5.6184	-0.797878
ENSG00000188856	RPSAP47;	-1.29007	0.159567		6.91093	4.94167	5.50928	4.39427	-0.797057
ENSG00000265254	;	-0.881218	0.161561		6.24517	6.3737	5.34883	5.6184	-0.791663
ENSG00000174125	TLR1;TLR1	-1.41481	0.164099		4.54778	5.90713	3.92464	4.39427	-0.784894
ENSG00000140511	HAPLN3;HAPLN3	-0.78516	0.165662		6.68969	6.75998	6.21548	5.69153	-0.780778
ENSG00000186197	EDARADD;EDARADD	-1.31921	0.166518		5.02298	5.71073	3.84666	4.61083	-0.778539
ENSG00000105404	RABAC1;RABAC1	-0.910689	0.168007		6.10876	6.2097	5.26138	5.37374	-0.774674
ENSG00000254290	;	-1.54646	0.168163		4.80486	4.94167	3.58373	3.74046	-0.774269
ENSG00000254019	;	-1.21424	0.169492		5.84815	5.16285	4.7209	4.20744	-0.770851
ENSG00000062282	DGAT2;DGAT2	-0.830448	0.169594		6.40904	6.41733	5.72076	5.54137	-0.77059
ENSG00000275765	;	-1.01428	0.169595		5.90417	5.81227	4.99838	4.88473	-0.770587
ENSG00000165821	SALL2;SALL2	-1.22294	0.170746		5.49377	5.30898	4.48391	4.20744	-0.767649
ENSG00000100344	PNPLA3;PNPLA3	-1.19126	0.170786		5.1208	5.90713	4.53452	4.50661	-0.767548
ENSG00000240184	PCDHGC3;PCDHGC3	-1.09588	0.170923		5.9581	5.56317	5.06876	4.45154	-0.7672
ENSG00000141294	LRRC46;LRRC46	-0.980458	0.173951		5.7598	6.32872	5.37684	4.92572	-0.759573
ENSG00000138617	PARP16;PARP16	-0.796621	0.176004		6.52078	6.52095	5.90517	5.6184	-0.754477
ENSG00000212694	LINC01089;	-1.51489	0.177169		4.54778	5.35458	4.06898	3.43448	-0.751611
ENSG00000162592	CCDC27;CCDC27	-1.33869	0.177713		5.16734	5.11065	4.06898	3.99276	-0.750281
ENSG00000198205	ZXDA;ZXDA	-1.10251	0.178647		5.84815	5.39878	4.7209	4.61083	-0.748005
ENSG00000236662	;	-1.45569	0.179212		5.59936	4.52947	3.58373	4.27244	-0.746632
ENSG00000265660	MIR4664;	-1.09856	0.179568		6.24517	5.71073	5.48374	4.27244	-0.745771
ENSG00000244968	LIFR-AS1;	-1.43933	0.179727		5.37984	4.60687	3.84666	3.91347	-0.745387
ENSG00000100150	DEPDC5;DEPDC5	-1.02762	0.180172		6.17858	6.05256	4.48391	5.64319	-0.744312
ENSG00000114948	ADAM23;ADAM23	-0.826315	0.18046		6.52078	6.2343	5.63057	5.59318	-0.743618
ENSG00000286169	AHRR;AHRR	-0.838047	0.181769		6.34975	6.48039	5.86618	5.34381	-0.740481
ENSG00000260588	;	-1.39216	0.182236		5.21241	4.88064	3.76423	4.06793	-0.739365
ENSG00000276791	;	-1.07939	0.182896		5.59936	5.77921	4.96186	4.45154	-0.737796
ENSG00000252645	RNU7-111P;	-1.38722	0.183488		4.80486	5.6015	4.48391	3.54385	-0.736391
ENSG00000121552	CSTA;CSTA	-1.35089	0.183576		5.29855	5.05649	4.37702	3.6455	-0.736184
ENSG00000238142	;	-0.832697	0.184279		6.13241	6.72569	5.58327	5.76113	-0.734523
ENSG00000171346	KRT15;KRT15	-0.941832	0.187328		5.81929	6.2097	4.99838	5.31324	-0.727398
ENSG00000115540	MOB4;MOB4	-0.839346	0.192573		6.17858	6.79348	5.40432	5.99095	-0.715405
ENSG00000162004	CCDC78;CCDC78	-0.785954	0.196495		6.24517	6.72569	5.76382	5.76113	-0.706648
ENSG00000021300	PLEKHB1;PLEKHB1	-1.25979	0.197798		5.41882	5.00023	4.32045	3.99276	-0.703779
ENSG00000174788	PCP2;PCP2	-1.11352	0.198734		5.29855	5.71073	4.67651	4.39427	-0.701729
ENSG00000279047	;	-0.92929	0.198763		5.78985	6.10687	5.13587	5.07895	-0.701664
ENSG00000173928	SWSAP1;SWSAP1	-0.930912	0.200691		6.22331	5.71073	5.19999	5.07895	-0.697472
ENSG00000233033	CASK-AS1;	-1.1811	0.202857		5.29855	5.30898	4.32045	4.27244	-0.69281
ENSG00000143434	SEMA6C;SEMA6C	-1.06007	0.202955		5.59936	5.6015	4.84641	4.45154	-0.6926
ENSG00000254614	;	-1.00889	0.203375		6.0354	5.48332	5.034	4.70802	-0.691702
ENSG00000104537	ANXA13;ANXA13	-0.995227	0.204943		5.49377	6.02463	4.84641	4.92572	-0.688367
ENSG00000100100	PIK3IP1;MGC17330	-1.00915	0.207133		5.78985	5.56317	4.7209	4.84254	-0.68375
ENSG00000144158	;	-1.29684	0.207309		5.33977	4.81691	3.99861	4.06793	-0.683381
ENSG00000116151	MORN1;MORN1	-0.796941	0.207649		6.48448	6.18467	5.67637	5.51475	-0.68267
ENSG00000255062	;	-0.907724	0.208055		6.20112	6.05256	5.63057	4.84254	-0.681822
ENSG00000157570	TSPAN18;TSPAN18	-0.829825	0.210886		6.13241	6.2097	5.45775	5.34381	-0.675952
ENSG00000274712	;	-1.38112	0.21202		4.97146	5.00023	4.20019	3.43448	-0.673622
ENSG00000239779	WBP1;WBP1	-1.12978	0.21219		5.49377	5.35458	4.13608	4.70802	-0.673275
ENSG00000073670	ADAM11;ADAM11	-0.910339	0.213367		6.0354	5.96707	5.43128	4.84254	-0.670873
ENSG00000160460	SPTBN4;SPTBN4	-0.884237	0.214008		6.08472	6.13327	5.58327	4.92572	-0.66957
ENSG00000204791	SMPD5;	-1.25315	0.215846		5.37984	4.94167	4.37702	3.82956	-0.665857
ENSG00000141384	TAF4B;TAF4B	-0.916719	0.21632		5.98433	5.77921	5.13587	4.96558	-0.664904
ENSG00000269858	EGLN2;EGLN2	-0.855536	0.216653		6.22331	5.96707	5.45775	5.14986	-0.664235
ENSG00000286176	;	-0.869748	0.217924		5.93139	6.07997	5.16828	5.25009	-0.661695
ENSG00000226287	TMEM191A;	-0.867599	0.218409		5.84815	6.32872	5.13587	5.45999	-0.660729
ENSG00000142623	PADI1;PADI1	-0.821134	0.218553		6.30882	6.10687	5.26138	5.6184	-0.660443
ENSG00000143590	EFNA3;EFNA3	-1.05762	0.220512		5.78985	5.30898	4.84641	4.39427	-0.656567
ENSG00000141540	TTYH2;TTYH2	-0.793561	0.220512		6.76727	6.57973	6.34874	5.31324	-0.656567
ENSG00000105672	ETV2;ETV2	-1.10114	0.220909		5.25613	5.5238	4.37702	4.50661	-0.655786
ENSG00000100867	DHRS2;DHRS2	-1.01733	0.223742		5.49377	5.63884	4.63072	4.70802	-0.650252
ENSG00000232368	FTLP2;	-1.16518	0.223835		5.07272	5.8762	4.9244	3.91347	-0.650073
ENSG00000106688	SLC1A1;SLC1A1	-1.12609	0.223835		5.72911	5.2619	3.99861	4.92572	-0.650073
ENSG00000198133	TMEM229B;TMEM229B	-1.03119	0.224762		5.63291	5.74538	5.13587	4.27244	-0.648277
ENSG00000103485	QPRT;QPRT	-0.850109	0.226813		6.38954	5.90713	5.60711	5.11484	-0.644332
ENSG00000105088	OLFM2;OLFM2	-0.81541	0.22792		6.44725	5.93741	5.43128	5.48763	-0.642218
ENSG00000228417	;	-1.10322	0.228695		5.56502	5.35458	4.06898	4.84254	-0.640744
ENSG00000162572	SCNN1D;SCNN1D	-1.09658	0.230426		5.78985	5.05649	4.67651	4.33464	-0.637469
ENSG00000175611	LINC00476;	-1.04793	0.231326		5.37984	5.6015	4.37702	4.75427	-0.635776
ENSG00000251169	LINC01843;	-1.22916	0.231613		5.1208	5.05649	3.92464	4.20744	-0.635237
ENSG00000173083	HPSE;HPSE	-0.867562	0.231691		6.10876	6.10687	5.63057	4.88473	-0.635091
ENSG00000114859	CLCN2;CLCN2	-0.917987	0.233444		5.63291	6.05256	4.84641	5.18405	-0.631818
ENSG00000203499	IQANK1;IQANK1	-0.935109	0.234383		5.84815	5.71073	5.13587	4.70802	-0.630075
ENSG00000055118	KCNH2;KCNH2	-1.04652	0.234725		6.06027	5.39878	5.26138	4.20744	-0.62944
ENSG00000159784	FAM131B;FAM131B	-1.19707	0.234898		5.25613	5.00023	4.20019	4.06793	-0.629121
ENSG00000115257	PCSK4;PCSK4	-1.1271	0.236601		5.45678	5.5238	4.96186	3.82956	-0.625983
ENSG00000183114	FAM43B;FAM43B	-1.02233	0.242459		5.7598	5.44167	5.034	4.27244	-0.615362
ENSG00000204965	PCDHA5;PCDHA5	-1.27817	0.243021		4.61647	5.30898	3.92464	3.99276	-0.614357
ENSG00000135373	EHF;EHF	-1.04401	0.243323		6.30882	5.67523	4.06898	5.66756	-0.613817
ENSG00000147689	FAM83A;FAM83A	-0.910032	0.244007		5.81929	5.71073	4.84641	5.04214	-0.612598
ENSG00000101276	SLC52A3;SLC52A3	-1.31502	0.24778		5.1208	4.60687	3.84666	3.82956	-0.605934
ENSG00000247317	LY6E-DT;	-1.24574	0.248359		5.07272	4.94167	4.20019	3.74046	-0.60492
ENSG00000271780	;	-1.23523	0.249654		5.25613	5.11065	3.48424	4.61083	-0.602661
ENSG00000258839	MC1R;MC1R	-1.06038	0.250584		5.33977	5.67523	4.96186	4.06793	-0.601047
ENSG00000069188	SDK2;SDK2	-0.785326	0.252541		6.67366	5.96707	5.84628	5.37374	-0.597668
ENSG00000170703	TTLL6;TTLL6	-1.22192	0.252659		5.16734	4.88064	4.20019	3.82956	-0.597465
ENSG00000105479	CCDC114;CCDC114	-1.36066	0.252996		4.97146	4.68034	3.37738	4.06793	-0.596886
ENSG00000142552	RCN3;RCN3	-1.15095	0.255203		5.25613	5.00023	4.13608	4.20744	-0.593114
ENSG00000213420	GPC2;GPC2	-1.2466	0.255528		5.49377	4.52947	4.26157	3.82956	-0.592561
ENSG00000173432	SAA1;SAA1	-1.2512	0.256696		4.86256	5.00023	3.84666	3.99276	-0.590582
ENSG00000006606	CCL26;CCL26	-1.19724	0.25733		5.1208	5.05649	4.37702	3.74046	-0.589509
ENSG00000123689	G0S2;G0S2	-1.26978	0.257455		5.21241	4.60687	3.99861	3.82956	-0.589298
ENSG00000205559	CHKB-DT;	-1.22651	0.257624		5.21241	5.00023	4.48391	3.54385	-0.589013
ENSG00000254682	;	-0.809288	0.258981		6.13241	6.18467	5.72076	5.00437	-0.586733
ENSG00000280161	;	-1.00566	0.25908		5.16734	5.77921	4.67651	4.55966	-0.586566
ENSG00000121316	PLBD1;PLBD1	-1.03249	0.259833		5.25613	5.5238	4.32045	4.66025	-0.585306
ENSG00000142046	TMEM91;TMEM91	-0.807032	0.262992		6.24517	6.25849	5.8858	4.96558	-0.580057
ENSG00000119922	IFIT2;IFIT2	-0.782647	0.26302		5.93139	6.43866	5.26138	5.66756	-0.580011
ENSG00000226944	;	-1.12416	0.263057		5.25613	5.16285	4.53452	3.91347	-0.57995
ENSG00000181885	CLDN7;CLDN7	-1.02228	0.265997		5.45678	5.30898	4.32045	4.66025	-0.575123
ENSG00000171119	NRTN;NRTN	-1.10049	0.266448		5.29855	5.39878	4.80577	3.82956	-0.574387
ENSG00000224713	;	-0.853173	0.266508		6.65745	5.90713	5.98012	4.88473	-0.57429
ENSG00000144452	ABCA12;ABCA12	-1.04996	0.267146		5.25613	5.56317	4.06898	4.84254	-0.573252
ENSG00000263414	MIR3187;	-1.19815	0.268852		4.61647	5.39878	4.13608	3.99276	-0.570488
ENSG00000275964	;	-0.791417	0.269962		5.78985	6.3737	5.32027	5.43181	-0.568698
ENSG00000089163	SIRT4;SIRT4	-1.06912	0.27127		5.1208	5.39878	4.53452	4.13937	-0.566598
ENSG00000155666	KDM8;KDM8	-0.92436	0.273853		5.49377	5.77921	5.034	4.55966	-0.562483
ENSG00000169894	MUC3A;MUC3A	-1.10264	0.275375		6.15568	5.16285	5.34883	3.74046	-0.560075
ENSG00000104835	SARS2;SARS2	-1.13748	0.276174		4.68204	5.5238	4.20019	4.20744	-0.558818
ENSG00000130829	DUSP9;DUSP9	-0.823733	0.277517		5.90417	5.90713	5.34883	4.92572	-0.55671
ENSG00000245571	FAM111A-DT;	-0.827794	0.278271		5.56502	6.61763	5.55902	5.25009	-0.555532
ENSG00000183023	SLC8A1;SLC8A1	-0.78905	0.279358		5.93139	5.99614	5.23101	5.25009	-0.553839
ENSG00000250838	;	-1.0452	0.284135		5.37984	5.11065	4.20019	4.50661	-0.546476
ENSG00000275185	;	-0.915725	0.285294		5.37984	5.74538	4.7209	4.79908	-0.544707
ENSG00000218426	;	-0.809003	0.285294		5.98433	5.99614	5.53437	4.88473	-0.544707
ENSG00000143344	RGL1;RGL1	-0.908878	0.285582		5.45678	5.74538	4.96186	4.61083	-0.54427
ENSG00000146205	ANO7;ANO7	-1.21305	0.285732		5.25613	4.52947	3.99861	3.91347	-0.544042
ENSG00000272473	;	-1.02384	0.287883		5.07272	5.67523	4.80577	4.13937	-0.540784
ENSG00000163312	HELQ;HELQ	-0.807283	0.287985		5.87643	5.99614	4.9244	5.43181	-0.54063
ENSG00000127989	MTERF1;MTERF1	-1.0347	0.287993		4.86256	5.77921	4.63072	4.33464	-0.540617
ENSG00000234494	SP2-AS1;	-1.10153	0.289061		5.56502	4.81691	3.92464	4.61083	-0.539011
ENSG00000079308	TNS1;TNS1	-0.841232	0.289167		6.30882	5.44167	5.23101	5.11484	-0.538851
ENSG00000241990	PRR34-AS1;	-1.25306	0.289707		4.97146	4.81691	3.37738	4.27244	-0.538041
ENSG00000154309	DISP1;DISP1	-0.837178	0.293723		5.69775	5.77921	4.9244	5.04214	-0.532062
ENSG00000180211	;	-1.20963	0.295143		4.68204	5.35458	4.48391	3.43448	-0.529968
ENSG00000271155	;	-1.13819	0.2959		5.07272	5.00023	4.37702	3.74046	-0.528855
ENSG00000228288	PCAT6;	-0.904711	0.297095		5.69775	5.39878	4.88593	4.61083	-0.527104
ENSG00000138606	SHF;SHF	-1.17423	0.29963		4.68204	5.11065	3.92464	3.99276	-0.523414
ENSG00000129521	EGLN3;EGLN3	-1.30659	0.302283		8.90228	8.79585	6.45767	8.1803	-0.519587
ENSG00000124140	SLC12A5;SLC12A5	-0.919832	0.302524		5.63291	5.67523	5.23101	4.27244	-0.519241
ENSG00000188681	TEKT4P2;	-1.0673	0.302876		5.33977	4.88064	4.32045	4.13937	-0.518735
ENSG00000176399	DMRTA1;DMRTA1	-0.889469	0.302958		5.56502	5.5238	4.84641	4.66025	-0.518618
ENSG00000250182	EEF1A1P13;	-0.951005	0.305233		5.45678	5.35458	4.32045	4.79908	-0.515368
ENSG00000188060	RAB42;RAB42	-0.924207	0.306408		5.45678	5.39878	4.67651	4.55966	-0.513699
ENSG00000168280	KIF5C;KIF5C	-1.19691	0.307936		4.47566	5.21322	3.76423	4.06793	-0.511539
ENSG00000175920	DOK7;DOK7	-0.831128	0.30923		5.63291	5.74538	4.99838	4.88473	-0.509718
ENSG00000114854	TNNC1;TNNC1	-0.865479	0.310249		5.66569	5.63884	5.13587	4.55966	-0.50829
ENSG00000162814	SPATA17;SPATA17	-1.21508	0.310743		4.54778	5.35458	3.37738	4.45154	-0.507598
ENSG00000188322	SBK1;SBK1	-0.911916	0.311483		5.49377	5.39878	4.53452	4.75427	-0.506565
ENSG00000203666	EFCAB2;EFCAB2	-0.927127	0.312912		5.52983	5.39878	4.32045	4.92572	-0.504578
ENSG00000236924	;	-0.822933	0.31327		5.66569	5.84459	5.23101	4.75427	-0.504081
ENSG00000232888	RPS11P5;	-1.07234	0.314071		4.74475	5.39878	4.06898	4.33464	-0.502973
ENSG00000231310	TBL1XR1-AS1;	-1.05277	0.314442		4.74475	5.48332	4.20019	4.33464	-0.50246
ENSG00000134020	PEBP4;PEBP4	-0.90293	0.318495		5.1208	5.96707	4.96186	4.61083	-0.496897
ENSG00000162888	C1orf147;	-0.881172	0.319664		5.52983	5.56317	4.48391	5.00437	-0.495307
ENSG00000237638	LINC02245;	-1.05281	0.324033		5.1208	5.21322	3.76423	4.66025	-0.489411
ENSG00000224220	DTNB-AS1;	-1.00956	0.324766		4.80486	5.6015	4.20019	4.55966	-0.48843
ENSG00000170482	SLC23A1;SLC23A1	-0.979346	0.326221		5.07272	5.35458	4.48391	4.27244	-0.486488
ENSG00000102362	SYTL4;SYTL4	-0.854848	0.327483		5.69775	5.5238	4.53452	5.11484	-0.484811
ENSG00000162755	KLHDC9;KLHDC9	-1.02047	0.3303		5.1208	5.05649	4.32045	4.13937	-0.481092
ENSG00000143554	SLC27A3;SLC27A3	-1.05293	0.33046		5.02298	5.00023	4.06898	4.20744	-0.480881
ENSG00000267207	;	-0.876192	0.330822		5.59936	5.35458	4.84641	4.55966	-0.480406
ENSG00000089820	ARHGAP4;ARHGAP4	-0.908444	0.332563		5.41882	5.39878	4.84641	4.33464	-0.478126
ENSG00000267737	;	-0.863793	0.332563		5.66569	5.35458	4.88593	4.61083	-0.478126
ENSG00000172780	RAB43;RAB43	-0.99192	0.332886		5.07272	5.30898	4.58342	4.06793	-0.477704
ENSG00000068831	RASGRP2;RASGRP2	-1.04087	0.334016		5.02298	5.11065	4.43145	3.91347	-0.476232
ENSG00000135517	MIP;MIP	-0.81884	0.334682		5.78985	5.5238	4.7209	5.11484	-0.475368
ENSG00000273142	LINC02604;	-0.816814	0.33523		5.84815	5.63884	5.32027	4.61083	-0.474657
ENSG00000218510	LINC00339;	-0.807774	0.337935		5.59936	6.18467	5.55902	4.66025	-0.471167
ENSG00000114115	RBP1;RBP1	-0.972289	0.338079		4.80486	5.63884	4.43145	4.45154	-0.470982
ENSG00000221955	SLC12A8;SLC12A8	-0.956644	0.339216		5.02298	5.48332	4.20019	4.66025	-0.469524
ENSG00000234648	;	-0.880705	0.34011		5.21241	5.63884	4.76396	4.55966	-0.46838
ENSG00000180875	GREM2;GREM2	-1.11752	0.341672		4.91804	5.00023	3.48424	4.45154	-0.466391
ENSG00000161328	LRRC56;LRRC56	-0.950266	0.343331		5.69775	5.05649	4.96186	4.06793	-0.464288
ENSG00000259456	ADNP-AS1;	-0.799791	0.347126		5.29855	6.30568	5.32027	4.96558	-0.459513
ENSG00000198618	PPIAP22;	-0.831502	0.347863		5.69775	5.35458	4.88593	4.70802	-0.458592
ENSG00000103599	IQCH;IQCH	-1.09579	0.348493		4.86256	4.81691	3.99861	3.91347	-0.457806
ENSG00000180089	TMEM86B;TMEM86B	-1.06206	0.352919		4.97146	4.81691	4.06898	3.99276	-0.452325
ENSG00000152076	CCDC74B;CCDC74B	-0.851188	0.353409		5.07272	6.2343	5.23101	4.70802	-0.451722
ENSG00000256393	RPL41P5;	-0.967134	0.353427		4.80486	5.48332	4.32045	4.39427	-0.4517
ENSG00000244363	RPL7P23;	-1.16413	0.353524		4.04842	5.44167	3.92464	3.99276	-0.451581
ENSG00000188833	ENTPD8;ENTPD8	-1.17233	0.354302		4.97146	4.60687	4.26157	3.31614	-0.450627
ENSG00000079385	CEACAM1;CEACAM1	-0.943275	0.354302		5.07272	5.30898	4.20019	4.55966	-0.450627
ENSG00000185670	ZBTB3;ZBTB3	-0.845868	0.354582		5.59936	5.30898	4.58342	4.84254	-0.450283
ENSG00000079156	OSBPL6;OSBPL6	-0.796162	0.355182		5.59936	6.02463	4.58342	5.48763	-0.449549
ENSG00000247121	;	-1.03868	0.355205		5.29855	5.00023	3.58373	4.75427	-0.449521
ENSG00000234764	E2F6P1;	-0.828242	0.355205		5.25613	5.77921	4.76396	4.84254	-0.449521
ENSG00000126583	PRKCG;PRKCG	-0.860983	0.35543		5.59936	5.21322	4.76396	4.55966	-0.449246
ENSG00000230289	;	-0.823158	0.355434		5.52983	5.48332	4.88593	4.66025	-0.449241
ENSG00000268049	;	-1.0568	0.357435		5.02298	4.75024	3.99861	4.06793	-0.446803
ENSG00000233382	NKAPP1;	-1.0702	0.361553		4.91804	4.81691	3.76423	4.20744	-0.441828
ENSG00000177453	NIM1K;NIM1K	-0.980309	0.36511		5.1208	5.00023	3.99861	4.45154	-0.437576
ENSG00000287271	;	-0.828943	0.366552		5.56502	5.30898	4.7209	4.70802	-0.435864
ENSG00000167644	C19orf33;IMUP	-0.913081	0.367686		5.41882	5.11065	4.76396	4.13937	-0.434523
ENSG00000161664	ASB16;ASB16	-1.01411	0.367861		5.02298	4.94167	3.84666	4.39427	-0.434316
ENSG00000171962	DRC3;DRC3	-0.877153	0.369748		5.59936	5.05649	4.76396	4.39427	-0.432094
ENSG00000267049	;	-0.816972	0.370091		5.66569	5.30898	4.9244	4.61083	-0.431691
ENSG00000143847	PPFIA4;PPFIA4	-1.20407	0.370538		5.21241	4.06433	3.37738	4.13937	-0.431167
ENSG00000091262	ABCC6;ABCC6	-0.879846	0.37313		5.69775	5.21322	5.1027	4.13937	-0.42814
ENSG00000255422	;	-0.899315	0.373445		4.86256	5.63884	4.53452	4.50661	-0.427773
ENSG00000254367	;	-1.03704	0.374873		4.68204	5.05649	3.92464	4.13937	-0.426116
ENSG00000106927	AMBP;AMBP	-0.827183	0.375637		5.25613	5.56317	4.76396	4.61083	-0.425231
ENSG00000258428	;	-1.11412	0.37618		4.80486	4.88064	4.37702	3.31614	-0.424604
ENSG00000269374	;	-0.786548	0.377136		5.59936	5.44167	4.76396	4.88473	-0.423502
ENSG00000261840	;	-1.09484	0.37902		4.61647	4.94167	4.20019	3.54385	-0.421338
ENSG00000135697	BCO1;BCO1	-1.05526	0.379091		4.91804	4.68034	3.99861	3.91347	-0.421257
ENSG00000086717	PPEF1;PPEF1	-0.869688	0.380598		5.1208	5.71073	4.20019	5.04214	-0.419534
ENSG00000207617	MIR3074;	-0.964077	0.380866		5.29855	4.94167	4.67651	3.82956	-0.419228
ENSG00000229425	;	-0.962395	0.381281		4.86256	5.21322	3.99861	4.45154	-0.418755
ENSG00000139438	FAM222A;C12orf34	-0.824261	0.384715		6.13241	5.11065	5.32027	4.50661	-0.414861
ENSG00000162390	ACOT11;ACOT11	-0.828852	0.386074		5.07272	5.81227	4.96186	4.50661	-0.41333
ENSG00000257815	PRANCR;	-0.808265	0.387865		5.56502	5.30898	4.9244	4.50661	-0.41132
ENSG00000170801	HTRA3;HTRA3	-0.932019	0.388818		5.29855	4.81691	4.37702	4.20744	-0.410253
ENSG00000100626	GALNT16;GALNT16	-1.08757	0.389552		4.80486	4.75024	4.26157	3.43448	-0.409435
ENSG00000119636	BBOF1;BBOF1	-0.808187	0.393082		5.56502	5.35458	5.034	4.39427	-0.405517
ENSG00000276116	FUT8-AS1;	-0.925017	0.394293		4.91804	5.16285	4.20019	4.33464	-0.404181
ENSG00000070759	TESK2;TESK2	-0.910298	0.394442		5.33977	5.00023	4.7209	3.99276	-0.404017
ENSG00000272323	;	-0.994532	0.396301		4.74475	5.00023	4.20019	3.91347	-0.401975
ENSG00000267422	;	-1.11127	0.39632		4.14459	5.21322	3.58373	4.13937	-0.401954
ENSG00000156265	MAP3K7CL;MAP3K7CL	-0.876016	0.396866		5.02298	5.48332	4.80577	4.13937	-0.401356
ENSG00000249242	TMEM150C;TMEM150C	-0.868795	0.397597		5.52983	4.88064	4.43145	4.55966	-0.400557
ENSG00000267811	;	-0.901303	0.397714		5.16734	5.00023	4.37702	4.27244	-0.400429
ENSG00000221944	TIGD1;TIGD1	-0.809057	0.397789		5.25613	5.48332	4.80577	4.50661	-0.400348
ENSG00000124466	LYPD3;LYPD3	-0.939901	0.397824		4.80486	5.2619	4.48391	3.99276	-0.400309
ENSG00000229862	;	-1.01002	0.397841		5.49377	4.26869	4.06898	4.27244	-0.40029
ENSG00000167619	TMEM145;TMEM145	-0.93043	0.398186		4.86256	5.2619	4.53452	3.99276	-0.399914
ENSG00000232530	LIF-AS1;	-0.79368	0.399056		5.07272	5.84459	4.80577	4.79908	-0.398966
ENSG00000128596	CCDC136;CCDC136	-0.915349	0.400455		5.25613	4.94167	3.99861	4.61083	-0.397446
ENSG00000101144	BMP7;BMP7	-1.01559	0.401036		4.61647	5.05649	4.26157	3.74046	-0.396817
ENSG00000253215	;	-0.842467	0.401987		5.37984	5.35458	4.13608	5.00437	-0.395788
ENSG00000106588	PSMA2;PSMA2	-0.843279	0.406212		4.74475	5.93741	4.76396	4.66025	-0.391247
ENSG00000205746	;	-1.15088	0.408963		4.54778	5.05649	4.48391	2.88864	-0.388316
ENSG00000101342	TLDC2;TLDC2	-0.888436	0.41068		5.37984	5.39878	3.76423	5.14986	-0.386496
ENSG00000167772	ANGPTL4;ANGPTL4	-0.825736	0.41068		9.60232	8.92237	7.85118	8.922	-0.386496
ENSG00000186326	RGS9BP;RGS9BP	-0.838349	0.413776		5.41882	5.30898	5.034	4.06793	-0.383234
ENSG00000224790	;	-0.936981	0.41441		4.68204	5.30898	3.92464	4.50661	-0.382569
ENSG00000137507	LRRC32;LRRC32	-0.958535	0.414921		5.07272	4.68034	3.99861	4.20744	-0.382035
ENSG00000229539	PANK2-AS1;	-0.818294	0.415852		5.37984	5.11065	4.58342	4.50661	-0.381061
ENSG00000157927	RADIL;RADIL	-0.915545	0.416364		5.21241	4.75024	4.13608	4.33464	-0.380527
ENSG00000271503	CCL5;CCL5	-0.8998	0.416448		4.86256	5.16285	4.32045	4.20744	-0.380439
ENSG00000242951	;	-0.886656	0.416448		4.97146	5.11065	4.32045	4.27244	-0.380439
ENSG00000105717	PBX4;PBX4	-0.783924	0.418358		5.16734	5.6015	4.88593	4.50661	-0.378452
ENSG00000114812	VIPR1;VIPR1	-1.09348	0.418682		4.14459	5.16285	4.20019	3.43448	-0.378116
ENSG00000138400	MDH1B;MDH1B	-0.907995	0.419791		4.68204	5.30898	4.32045	4.20744	-0.376967
ENSG00000236772	;	-0.882049	0.432601		5.41882	4.75024	4.67651	3.99276	-0.363912
ENSG00000241081	RPL22P2;	-0.89128	0.435749		4.47566	5.56317	4.26157	4.45154	-0.360763
ENSG00000228709	LINC02575;	-0.816805	0.435904		4.86256	5.5238	4.43145	4.61083	-0.360609
ENSG00000264920	;	-0.952683	0.445734		4.97146	4.68034	4.37702	3.6455	-0.350924
ENSG00000260233	ZNRD2-AS1;	-0.916098	0.447232		5.33977	4.60687	4.63072	3.74046	-0.349467
ENSG00000172824	CES4A;CES4A	-0.84949	0.449092		4.61647	5.56317	4.63072	4.20744	-0.347664
ENSG00000131398	KCNC3;KCNC3	-0.975497	0.453644		5.02298	4.36095	4.13608	3.74046	-0.343285
ENSG00000169627	BOLA2B;BOLA2B	-1.04812	0.454938		5.29855	3.82616	4.13608	3.6455	-0.342048
ENSG00000228322	;	-0.898845	0.460809		4.97146	4.68034	4.20019	3.99276	-0.336479
ENSG00000189171	S100A13;S100A13	-0.781501	0.462507		4.68204	5.99614	4.53452	5.00437	-0.334881
ENSG00000231955	;	-0.939828	0.465692		4.74475	4.68034	3.76423	4.13937	-0.331901
ENSG00000110002	VWA5A;LOH11CR2A	-0.914031	0.465707		4.61647	5.00023	3.76423	4.33464	-0.331887
ENSG00000169851	PCDH7;PCDH7	-0.819245	0.469768		5.02298	5.00023	4.48391	4.13937	-0.328116
ENSG00000257511	;	-0.884121	0.471752		5.1208	4.75024	3.6768	4.61083	-0.326286
ENSG00000186648	CARMIL3;CARMIL3	-0.861838	0.473531		4.74475	5.00023	4.32045	3.99276	-0.324651
ENSG00000204923	FBXO48;FBXO48	-0.877226	0.47574		4.68204	4.94167	4.20019	3.99276	-0.322631
ENSG00000261377	PDCD6IPP2;	-0.809937	0.479603		5.41882	4.60687	4.32045	4.45154	-0.319118
ENSG00000108387	SEPTIN4;SEPTIN4	-0.889834	0.481709		4.61647	4.88064	3.92464	4.13937	-0.317215
ENSG00000258938	;	-0.910057	0.482494		4.39974	5.00023	3.92464	4.06793	-0.316508
ENSG00000127507	ADGRE2;ADGRE2	-0.782245	0.483654		4.74475	5.39878	4.53452	4.33464	-0.315465
ENSG00000187796	CARD9;CARD9	-0.808954	0.48493		5.16734	4.94167	4.7209	3.91347	-0.314321
ENSG00000118690	ARMC2;ARMC2	-0.848504	0.485398		4.97146	4.81691	4.48391	3.82956	-0.313902
ENSG00000231858	;	-0.850047	0.485683		4.91804	4.75024	3.99861	4.27244	-0.313647
ENSG00000176896	TCEANC;TCEANC	-0.831503	0.486372		4.68204	5.21322	3.92464	4.55966	-0.313031
ENSG00000250159	;	-0.942065	0.491953		4.14459	5.11065	4.20019	3.6455	-0.308077
ENSG00000259319	;	-0.797577	0.49204		5.49377	4.52947	4.26157	4.55966	-0.307999
ENSG00000272523	LINC01023;	-0.888133	0.493227		4.74475	4.68034	3.76423	4.20744	-0.306954
ENSG00000166407	LMO1;LMO1	-0.810216	0.494445		4.61647	5.21322	4.26157	4.27244	-0.305882
ENSG00000250321	;	-0.906354	0.497835		4.3196	5.05649	3.6768	4.27244	-0.302915
ENSG00000261118	;	-0.800632	0.497835		4.74475	5.11065	4.13608	4.39427	-0.302915
ENSG00000174405	LIG4;LIG4	-0.892272	0.505064		4.80486	4.52947	3.6768	4.20744	-0.296653
ENSG00000147586	MRPS28;MRPS28	-0.9429	0.506263		3.8344	5.2619	3.92464	3.99276	-0.295624
ENSG00000272172	;	-0.872104	0.507911		5.29855	4.17013	4.32045	3.91347	-0.294212
ENSG00000261189	;	-0.875257	0.512128		4.47566	4.88064	4.20019	3.74046	-0.290621
ENSG00000049540	ELN;ELN	-0.825083	0.513755		4.86256	4.68034	4.06898	4.13937	-0.289244
ENSG00000265150	NA	-1.25705	0.530317		7.40412	5.21322	5.94313	4.88473	-0.275464
ENSG00000260328	;	-0.781141	0.532521		4.80486	4.81691	4.20019	4.13937	-0.273663
ENSG00000151773	CCDC122;CCDC122	-0.786365	0.53559		5.16734	4.44767	4.06898	4.33464	-0.271168
ENSG00000287528	;	-0.816699	0.544188		4.68204	4.68034	4.26157	3.74046	-0.264251
ENSG00000012779	ALOX5;ALOX5	-0.79566	0.546792		4.68204	4.75024	3.84666	4.27244	-0.262178
ENSG00000198223	CSF2RA;CSF2RA	-1.5725	0.549402		3.94537	6.79348	5.1027	3.74046	-0.260109
ENSG00000257354	;	-0.813767	0.562913		4.86256	4.60687	3.37738	4.55966	-0.249558
ENSG00000157613	CREB3L1;CREB3L1	-0.8866	0.566048		5.16734	3.95015	4.48391	3.18722	-0.247146
ENSG00000108406	DHX40;DHX40	-0.780309	0.00883405		9.78687	10.0966	8.86112	9.43097	-2.05384
ENSG00000134202	GSTM3;GSTM3	-0.779115	0.029997		7.87978	8.13047	7.29098	7.20006	-1.52292
ENSG00000160401	CFAP157;CFAP157	-0.778886	0.0322057		7.91429	8.17563	7.41098	7.14904	-1.49207
ENSG00000172382	PRSS27;PRSS27	-0.778459	0.2208		6.40904	6.2097	5.65365	5.51475	-0.656001
ENSG00000125378	BMP4;BMP4	-0.778238	0.065207		7.33446	7.6163	6.70972	6.74177	-1.18571
ENSG00000089289	IGBP1;IGBP1	-0.777986	0.000725954		10.4595	10.7147	9.75572	9.87608	-3.13909
ENSG00000204991	SPIRE2;SPIRE2	-0.77789	0.019031		8.86395	8.70636	8.26496	7.72039	-1.72054
ENSG00000166924	NYAP1;NYAP1	-0.777831	0.233411		6.46599	6.10687	5.67637	5.45999	-0.631879
ENSG00000196154	S100A4;S100A4	-0.777496	5.59e-05		12.4033	12.4817	11.6235	11.7078	-4.25259
ENSG00000125741	OPA3;OPA3	-0.777399	0.00343154		9.91851	9.76633	9.25367	8.86255	-2.46451
ENSG00000069424	KCNAB2;KCNAB2	-0.777284	0.0117948		9.26523	9.0069	8.58614	8.11976	-1.92831
ENSG00000214160	ALG3;ALG3	-0.776755	0.00133812		10.1763	10.2417	9.58012	9.27515	-2.87351
ENSG00000130208	APOC1;APOC1	-0.776726	0.0576304		7.65331	7.4686	6.72069	6.89412	-1.23935
ENSG00000157399	ARSL;ARSE	-0.776318	0.00277178		9.39554	9.53093	8.78738	8.59354	-2.55724
ENSG00000160972	PPP1R16A;PPP1R16A	-0.775766	0.00347886		10.133	10.1558	9.59062	9.1138	-2.45856
ENSG00000164096	C4orf3;C4orf3	-0.775721	0.0168093		8.34711	8.59678	7.59513	7.82159	-1.77445
ENSG00000101347	SAMHD1;SAMHD1	-0.775587	0.0428664		8.21491	8.13701	7.07716	7.69097	-1.36788
ENSG00000255992	;	-0.774631	0.341029		6.15568	5.48332	5.29112	5.00437	-0.467208
ENSG00000118849	RARRES1;RARRES1	-0.77419	0.0914001		7.40412	7.77564	6.49649	7.13163	-1.03905
ENSG00000185515	BRCC3;BRCC3	-0.774104	0.218553		6.95138	6.39568	5.53437	6.30242	-0.660443
ENSG00000134215	VAV3;VAV3	-0.773749	0.148346		6.91093	6.88955	5.86618	6.40744	-0.828726
ENSG00000170892	TSEN34;TSEN34	-0.773268	0.00177981		10.3937	10.7725	9.90865	9.73474	-2.74963
ENSG00000105559	PLEKHA4;PLEKHA4	-0.773236	0.537754		5.52983	4.75024	5.06876	3.6455	-0.269416
ENSG00000129158	SERGEF;SERGEF	-0.773209	0.11193		6.97773	7.02262	6.24618	6.27095	-0.951055
ENSG00000089639	GMIP;GMIP	-0.772547	0.159678		7.2505	6.54081	6.23091	6.17221	-0.796754
ENSG00000013375	PGM3;PGM3	-0.772181	0.0722222		8.40651	8.42041	7.07716	8.06578	-1.14133
ENSG00000143382	ADAMTSL4;ADAMTSL4	-0.771893	0.427676		5.45678	5.2619	4.84641	4.50661	-0.368886
ENSG00000175573	C11orf68;C11orf68	-0.771515	0.00338088		9.9438	10.0661	9.43112	9.01516	-2.47097
ENSG00000273314	;	-0.771507	0.256865		6.42827	5.96707	5.43128	5.5675	-0.590295
ENSG00000228649	SNHG26;	-0.771301	0.146686		6.73674	6.80994	6.1026	5.9715	-0.833612
ENSG00000116918	TSNAX;TSNAX	-0.770939	0.0668697		7.52518	7.98584	6.81584	7.20006	-1.17477
ENSG00000196730	DAPK1;DAPK1	-0.770845	0.000630554		10.761	10.5808	9.81578	9.99038	-3.20028
ENSG00000163013	FBXO41;FBXO41	-0.770402	0.062797		8.05705	8.03568	7.6129	6.87331	-1.20206
ENSG00000237886	NALT1;	-0.770303	0.348493		5.98433	5.81227	5.55902	4.70802	-0.457806
ENSG00000150977	RILPL2;RILPL2	-0.769663	0.0868335		7.32423	7.20793	6.61881	6.42184	-1.06131
ENSG00000182912	TSPEAR-AS2;	-0.769118	0.561801		4.39974	5.00023	4.06898	4.13937	-0.250418
ENSG00000271969	;	-0.769066	0.0556284		7.948	8.66624	7.39737	7.76625	-1.2547
ENSG00000137802	MAPKBP1;MAPKBP1	-0.768848	0.10023		7.11463	7.10497	6.37675	6.36337	-0.999003
ENSG00000167995	BEST1;BEST1	-0.768743	9.79e-05		16.5768	16.8112	15.9805	15.8777	-4.00922
ENSG00000115944	COX7A2L;COX7A2L	-0.768449	0.000508353		11.8079	12.1361	11.2743	11.1504	-3.29383
ENSG00000099203	TMED1;TMED1	-0.767357	0.00170634		9.63165	9.74509	8.96856	8.88351	-2.76793
ENSG00000237517	DGCR5;	-0.76719	0.361319		6.24517	5.44167	5.45775	4.88473	-0.44211
ENSG00000184845	DRD1;DRD1	-0.766785	0.332886		5.81929	6.10687	4.84641	5.59318	-0.477704
ENSG00000234062	;	-0.766668	0.518611		4.74475	5.21322	4.58342	4.06793	-0.285158
ENSG00000103876	FAH;FAH	-0.766106	0.00843073		8.73858	8.72384	8.01164	7.93636	-2.07414
ENSG00000258704	SRP54-AS1;	-0.765726	0.523328		4.86256	5.05649	4.58342	3.99276	-0.281226
ENSG00000178104	PDE4DIP;PDE4DIP	-0.765154	0.261784		6.24517	6.05256	5.50928	5.37374	-0.582058
ENSG00000138413	IDH1;HEL-S-26	-0.764742	0.000718794		12.1357	12.4337	11.3905	11.6543	-3.1434
ENSG00000218175	;	-0.76459	0.0307886		9.71233	10.6837	9.43945	9.58924	-1.51161
ENSG00000269151	;	-0.764538	0.18397		6.79717	6.43866	5.98012	5.82752	-0.735254
ENSG00000126934	MAP2K2;MAP2K2	-0.763843	0.000523294		11.9162	12.116	11.3905	11.1087	-3.28125
ENSG00000125967	NECAB3;NECAB3	-0.763557	0.0165496		8.65533	8.96341	8.23084	7.86965	-1.78121
ENSG00000248487	ABHD14A;ABHD14A	-0.763317	0.0602218		7.49813	7.57837	6.79523	6.79804	-1.22025
ENSG00000242071	RPL7AP6;	-0.762601	0.011092		8.63478	8.79998	8.05129	7.8749	-1.95499
ENSG00000176473	WDR25;WDR25	-0.762599	0.0294702		8.14106	8.43109	7.69307	7.37305	-1.53062
ENSG00000071073	MGAT4A;MGAT4A	-0.762283	0.561513		4.54778	4.88064	4.06898	4.13937	-0.25064
ENSG00000095713	CRTAC1;CRTAC1	-0.762278	0.343435		6.0354	5.56317	5.034	5.21745	-0.464155
ENSG00000165282	PIGO;PIGO	-0.761885	0.0011003		10.1806	10.1558	9.50754	9.30458	-2.95849
ENSG00000267601	;	-0.761805	0.00923961		9.87186	9.56285	9.18799	8.70958	-2.03435
ENSG00000155508	CNOT8;CNOT8	-0.761251	0.00538476		9.11011	9.07318	8.2499	8.42151	-2.26883
ENSG00000242659	;	-0.760158	0.626723		5.21241	3.69049	3.6768	4.33464	-0.202925
ENSG00000223901	;	-0.7597	0.179884		6.82646	6.54081	5.80564	6.12018	-0.745006
ENSG00000159224	GIP;GIP	-0.759687	0.38089		5.69775	6.07997	4.58342	5.64319	-0.4192
ENSG00000188483	IER5L;IER5L	-0.759513	0.000231745		11.0458	11.1157	10.3407	10.3058	-3.63499
ENSG00000043093	DCUN1D1;DCUN1D1	-0.759411	0.156714		6.62448	6.99409	6.05138	6.13773	-0.804892
ENSG00000059728	MXD1;MXD1	-0.758769	0.127551		6.89719	7.02262	6.27623	6.18914	-0.894317
ENSG00000114315	HES1;HES1	-0.758746	0.116951		7.04157	7.09157	6.19989	6.4642	-0.931995
ENSG00000166189	HPS6;HPS6	-0.758474	0.00630547		9.20795	9.18783	8.58614	8.29033	-2.20028
ENSG00000126561	STAT5A;STAT5A	-0.757882	0.0656419		7.44246	7.59746	6.81584	6.7532	-1.18282
ENSG00000136327	NKX2-8;NKX2-8	-0.757791	0.20363		6.79717	6.45968	6.15206	5.64319	-0.691158
ENSG00000239857	GET4;GET4	-0.757496	0.447232		5.33977	5.2619	4.76396	4.50661	-0.349467
ENSG00000236204	LINC01376;	-0.75717	0.471197		5.45678	4.94167	4.63072	4.50661	-0.326797
ENSG00000051523	CYBA;CYBA	-0.757139	0.000582675		12.4054	12.2738	11.741	11.4094	-3.23457
ENSG00000127946	HIP1;HIP1	-0.756378	0.00101187		10.3715	10.1892	9.49482	9.56512	-2.99488
ENSG00000160285	LSS;LSS	-0.754483	0.0029825		9.85951	9.74936	9.18997	8.90673	-2.52542
ENSG00000028137	TNFRSF1B;TNFRSF1B	-0.754413	0.563368		5.49377	4.17013	4.58342	4.06793	-0.249208
ENSG00000143882	ATP6V1C2;ATP6V1C2	-0.754158	7.67e-05		12.4686	12.4846	11.7034	11.7426	-4.1152
ENSG00000227372	TP73-AS1;	-0.754044	0.0330948		8.00035	8.00025	7.32013	7.20006	-1.48024
ENSG00000076864	RAP1GAP;RAP1GA1	-0.753624	0.00369477		9.2491	9.34576	8.54969	8.5516	-2.43241
ENSG00000110921	MVK;MVK	-0.753082	0.0129267		9.46936	9.52844	9.01163	8.43221	-1.88851
ENSG00000141526	SLC16A3;SLC16A3	-0.753041	0.00133018		11.106	10.7577	10.2318	10.1502	-2.87609
ENSG00000054116	TRAPPC3;TRAPPC3	-0.75216	0.00350908		9.5637	9.81608	9.02497	8.86519	-2.45481
ENSG00000137161	CNPY3;CNPY3	-0.752067	0.00479235		9.64815	9.52346	8.99139	8.67092	-2.31945
ENSG00000166347	CYB5A;CYB5A	-0.751503	0.00235741		9.53958	9.56527	8.79259	8.8197	-2.62757
ENSG00000069329	VPS35;VPS35	-0.751139	0.0207893		10.5145	10.8452	9.4852	10.2863	-1.68216
ENSG00000253304	TMEM200B;TMEM200B	-0.751086	0.449092		5.16734	5.5238	4.48391	4.88473	-0.347664
ENSG00000158292	GPR153;GPR153	-0.750929	0.462512		5.45678	5.2619	5.034	4.27244	-0.334877
ENSG00000220205	VAMP2;VAMP2	-0.750667	0.0699525		8.24776	7.70698	7.47068	7.03191	-1.1552
ENSG00000167646	DNAAF3;DNAAF3	-0.750224	0.319207		6.48448	5.63884	5.43128	5.43181	-0.495928
ENSG00000081803	CADPS2;CADPS2	-0.750062	0.576665		4.61647	4.81691	3.76423	4.39427	-0.239077
ENSG00000149646	CNBD2;CNBD2	-0.7499	0.471752		5.02298	5.39878	4.53452	4.61083	-0.326286
ENSG00000011478	QPCTL;QPCTL	-0.749811	0.0447889		8.24776	8.01453	7.607	7.15767	-1.34883
ENSG00000108179	PPIF;PPIF	-0.749765	0.000698722		10.6791	10.8281	10.0792	9.93248	-3.1557
ENSG00000007314	SCN4A;SCN4A	-0.749703	0.552682		4.61647	5.00023	4.26157	4.13937	-0.257524
ENSG00000137154	RPS6;RPS6	-0.749328	0.000269175		14.5961	14.846	13.8904	14.0592	-3.56997
ENSG00000147439	BIN3;BIN3	-0.749106	0.0830555		7.34462	7.56873	6.8562	6.59701	-1.08063
ENSG00000235169	SMIM1;SMIM1	-0.748958	0.555907		5.21241	4.44767	4.43145	4.06793	-0.254998
ENSG00000140057	AK7;AK7	-0.748915	0.411631		5.45678	5.5238	4.7209	4.92572	-0.385492
ENSG00000204055	;	-0.748909	0.00219431		9.60654	9.6153	8.86359	8.87045	-2.6587
ENSG00000214046	SMIM7;SMIM7	-0.74882	0.0184633		8.70743	9.23736	8.2499	8.25859	-1.73369
ENSG00000089351	GRAMD1A;GRAMD1A	-0.748609	0.000502999		12.333	12.4723	11.7935	11.5046	-3.29843
ENSG00000155465	SLC7A7;SLC7A7	-0.748398	0.107779		7.14982	7.19545	6.55895	6.33321	-0.967468
ENSG00000256092	SBNO1-AS1;	-0.748082	0.525742		5.21241	4.88064	3.99861	4.75427	-0.279227
ENSG00000170962	PDGFD;PDGFD	-0.747767	0.140778		7.28256	7.53941	6.21548	7.05056	-0.851466
ENSG00000158470	B4GALT5;B4GALT5	-0.747723	0.000465118		10.8049	10.8006	9.99816	10.1141	-3.33244
ENSG00000095370	SH2D3C;SH2D3C	-0.747703	0.57206		4.74475	4.68034	3.92464	4.27244	-0.242558
ENSG00000129535	NRL;NRL	-0.747496	0.177856		6.52078	7.06438	6.1026	6.10241	-0.749931
ENSG00000287051	;	-0.747302	0.00314843		9.86129	9.87789	8.96395	9.27316	-2.50191
ENSG00000261971	MMP25-AS1;	-0.747151	0.281984		6.10876	6.1592	5.58327	5.28201	-0.549776
ENSG00000260430	;	-0.746952	0.575252		4.91804	4.60687	4.48391	3.74046	-0.240142
ENSG00000109321	AREG;AREG	-0.74689	0.102239		7.14982	7.361	6.64208	6.42184	-0.990383
ENSG00000166046	TCP11L2;TCP11L2	-0.746334	0.10221		7.33446	7.14445	6.4312	6.60965	-0.990506
ENSG00000061656	SPAG4;SPAG4	-0.746262	0.0626332		7.90059	7.56873	6.91469	7.114	-1.2032
ENSG00000067182	TNFRSF1A;TNFRSF1A	-0.745629	0.000174354		12.3352	12.2381	11.6055	11.4769	-3.75857
ENSG00000253710	ALG11;ALG11	-0.745153	0.475827		5.59936	5.44167	4.06898	5.37374	-0.322551
ENSG00000179085	DPM3;DPM3	-0.743912	0.0211406		8.37216	8.3602	7.71518	7.54733	-1.67488
ENSG00000243566	UPK3B;UPK3B	-0.74366	0.0165526		8.83181	8.78756	8.25745	7.86439	-1.78113
ENSG00000148842	CNNM2;CNNM2	-0.743527	0.000708141		10.4323	10.4621	9.67482	9.73762	-3.14988
ENSG00000069966	GNB5;GNB5	-0.743471	0.0038862		9.61706	9.93153	9.07284	9.01279	-2.41048
ENSG00000214717	ZBED1;ZBED1	-0.743238	0.561572		4.86256	4.75024	4.43145	3.91347	-0.250595
ENSG00000136828	RALGPS1;RALGPS1	-0.743126	0.210162		6.82646	6.32872	5.92427	5.87015	-0.677446
ENSG00000149806	FAU;FAU	-0.742565	0.00287318		11.7325	12.2521	11.3033	11.2435	-2.54164
ENSG00000149016	TUT1;URLC6	-0.742046	0.18884		6.64106	6.63621	6.03389	5.82752	-0.723907
ENSG00000132481	TRIM47;TRIM47	-0.741623	0.0028971		10.8186	10.7481	10.2442	9.81193	-2.53804
ENSG00000227620	ALG1L8P;	-0.740903	0.431377		5.93139	5.16285	5.16828	4.66025	-0.365143
ENSG00000232472	EEF1B2P3;	-0.740857	0.0146718		8.60127	8.65717	7.98003	7.81069	-1.83352
ENSG00000102981	PARD6A;PARD6A	-0.740161	0.295143		6.50274	6.13327	5.98012	5.18405	-0.529968
ENSG00000148444	COMMD3;COMMD3	-0.74003	0.142418		6.85517	7.54925	6.54667	6.50534	-0.846436
ENSG00000170469	SPATA24;SPATA24	-0.739786	0.368297		5.52983	6.07997	5.32027	4.96558	-0.433801
ENSG00000174564	IL20RB;IL20RB	-0.738829	0.191571		6.57356	7.38317	6.48366	6.13773	-0.717669
ENSG00000115525	ST3GAL5;ST3GAL5	-0.738436	0.0028702		9.77377	9.87202	8.98002	9.19148	-2.54209
ENSG00000234136	;	-0.738024	0.606125		4.04842	5.16285	3.92464	4.27244	-0.217438
ENSG00000234742	;	-0.737405	0.601599		4.54778	4.75024	4.37702	3.6455	-0.220693
ENSG00000090372	STRN4;STRN4	-0.737181	0.00407309		11.2841	11.0056	10.618	10.1813	-2.39008
ENSG00000110446	SLC15A3;SLC15A3	-0.736758	0.137398		7.06634	6.90495	6.26128	6.30242	-0.86202
ENSG00000236682	MAP3K2-DT;	-0.736281	0.553989		4.86256	4.88064	4.48391	3.99276	-0.256499
ENSG00000125726	CD70;CD70	-0.736222	0.0119432		8.86395	8.83257	8.23084	8.00012	-1.92288
ENSG00000127995	CASD1;CASD1	-0.73586	0.179406		6.72122	6.99409	5.90517	6.37821	-0.746162
ENSG00000161960	EIF4A1;EIF4A1	-0.735396	0.504018		5.02298	5.16285	4.53452	4.39427	-0.297554
ENSG00000149328	GLB1L2;GLB1L2	-0.735222	0.245629		6.38954	6.41733	5.90517	5.48763	-0.60972
ENSG00000168209	DDIT4;DDIT4	-0.735139	0.000115814		12.963	13.0367	12.2948	12.2357	-3.93624
ENSG00000146233	CYP39A1;CYP39A1	-0.734794	0.364798		5.52983	6.13327	5.29112	5.07895	-0.437947
ENSG00000182612	TSPAN10;TSPAN10	-0.734437	0.243033		6.40904	6.32872	5.78488	5.5675	-0.614334
ENSG00000077348	EXOSC5;EXOSC5	-0.733373	0.00156548		10.1663	10.3456	9.56498	9.49024	-2.80535
ENSG00000230383	;	-0.732516	0.14807		6.85517	7.19545	6.18412	6.4642	-0.829533
ENSG00000135838	NPL;NPL	-0.732436	0.586686		4.23474	5.21322	4.37702	3.99276	-0.231594
ENSG00000244716	;	-0.732065	0.0159084		10.2845	10.8551	9.61875	10.0805	-1.79837
ENSG00000122884	P4HA1;P4HA1	-0.731898	0.0267398		10.1123	10.3271	9.03379	9.84436	-1.57284
ENSG00000183155	RABIF;RABIF	-0.731563	0.0320796		8.09967	8.15645	7.41773	7.40238	-1.49377
ENSG00000100906	NFKBIA;NFKBIA	-0.731293	0.00156999		10.9096	11.0496	10.0962	10.3925	-2.8041
ENSG00000220472	;	-0.731052	0.0102901		8.82457	8.96709	8.17211	8.17606	-1.98758
ENSG00000255301	;	-0.730932	0.0824914		8.52292	8.34334	8.09832	7.19168	-1.08359
ENSG00000077150	NFKB2;NFKB2	-0.730422	0.0011003		11.1544	11.0427	10.494	10.2363	-2.95849
ENSG00000091583	APOH;APOH	-0.730021	0.456005		5.33977	5.5238	4.43145	5.07895	-0.34103
ENSG00000171448	ZBTB26;ZBTB26	-0.729989	0.412897		5.63291	5.77921	4.58342	5.40307	-0.384159
ENSG00000227050	;	-0.728966	0.36511		6.20112	5.5238	5.32027	5.14986	-0.437576
ENSG00000158825	CDA;CDA	-0.728665	0.0116314		9.30999	9.06634	8.60698	8.32138	-1.93437
ENSG00000279806	;	-0.728643	0.502802		5.72911	4.68034	4.7209	4.61083	-0.298603
ENSG00000168002	POLR2G;POLR2G	-0.72838	0.00396578		10.295	10.7125	9.75171	9.83229	-2.40167
ENSG00000187860	CCDC157;CCDC157	-0.728261	0.0773962		7.55174	7.48919	6.78482	6.84154	-1.11128
ENSG00000255182	;	-0.728068	0.0109524		9.46471	9.41196	8.91703	8.48116	-1.96049
ENSG00000174791	RIN1;RIN1	-0.728013	0.0687915		8.27988	8.24386	7.86608	7.13163	-1.16247
ENSG00000258777	HIF1A-AS1;	-0.727236	0.119736		8.24776	7.361	7.02501	7.28914	-0.921775
ENSG00000091157	WDR7;WDR7	-0.72699	0.20274		6.62448	6.63621	5.80564	6.06621	-0.69306
ENSG00000198931	APRT;APRT	-0.726916	0.000494423		11.2802	11.3567	10.6578	10.5259	-3.3059
ENSG00000254452	;	-0.726211	0.00490465		9.66447	9.67268	9.07925	8.80054	-2.30939
ENSG00000101417	PXMP4;PXMP4	-0.726033	0.161795		7.17281	6.84231	6.5092	6.10241	-0.791036
ENSG00000274092	;	-0.725479	0.603889		4.68204	4.81691	4.58342	3.54385	-0.219043
ENSG00000197756	RPL37A;RPL37A	-0.725064	0.00238522		14.1083	14.6038	13.6104	13.693	-2.62247
ENSG00000243364	EFNA4;EFNA4	-0.724851	0.238756		6.44725	6.3737	5.69873	5.76113	-0.622045
ENSG00000279759	;	-0.724734	0.618031		4.74475	4.81691	4.7209	3.31614	-0.20899
ENSG00000175344	CHRNA7;CHRNA7	-0.724611	0.428944		5.49377	5.48332	4.80577	4.88473	-0.367599
ENSG00000128165	ADM2;ADM2	-0.724552	0.104545		7.66146	7.24472	6.88574	6.63459	-0.980698
ENSG00000188883	KLRG2;KLRG2	-0.724348	0.532521		5.81929	4.44767	4.80577	4.50661	-0.273663
ENSG00000198431	TXNRD1;TXNRD1	-0.724249	0.00146558		14.8105	14.9761	13.9541	14.3605	-2.83399
ENSG00000229851	ARSD-AS1;	-0.723493	0.103611		7.43297	7.2806	6.78482	6.5188	-0.984595
ENSG00000169598	DFFB;DFFB	-0.723355	0.300001		6.20112	6.02463	5.40432	5.48763	-0.522878
ENSG00000235750	KIAA0040;KIAA0040	-0.723227	0.488417		5.72911	4.81691	4.7209	4.70802	-0.311209
ENSG00000163735	CXCL5;CXCL5	-0.723001	0.00373526		11.6241	11.7502	10.7028	11.1899	-2.42768
ENSG00000213178	RPL22P1;	-0.722046	0.0795926		7.56917	7.55902	6.96169	6.7532	-1.09913
ENSG00000267147	LINC01842;	-0.721896	0.534413		4.80486	5.2619	4.63072	4.20744	-0.272123
ENSG00000174032	SLC25A30;SLC25A30	-0.721866	0.0981433		7.61186	7.48919	6.59516	7.06897	-1.00814
ENSG00000258451	EGILA;	-0.72167	0.0792978		7.80081	8.04266	6.91469	7.47322	-1.10074
ENSG00000185875	THNSL1;THNSL1	-0.721593	0.252557		6.34975	6.74294	5.55902	6.13773	-0.597641
ENSG00000212719	LINC02693;	-0.721388	0.0260549		8.46356	8.3032	7.63046	7.72039	-1.58411
ENSG00000278834	;	-0.720801	0.219899		6.81189	6.63621	6.32017	5.69153	-0.657777
ENSG00000173511	VEGFB;VEGFB	-0.719828	0.00271822		10.4347	10.3969	9.84365	9.53729	-2.56572
ENSG00000163682	RPL9;RPL9	-0.719218	0.00561367		13.0667	13.6447	12.5663	12.7584	-2.25075
ENSG00000127980	PEX1;PEX1	-0.718963	0.134972		7.14982	7.19545	6.27623	6.6591	-0.869755
ENSG00000184508	HDDC3;HDDC3	-0.718947	0.00926436		9.55716	9.2555	8.78738	8.60935	-2.03318
ENSG00000146677	;	-0.718853	0.615762		4.54778	4.68034	3.6768	4.33464	-0.210587
ENSG00000141524	TMC6;TMC6	-0.718834	0.0214598		9.36343	9.34011	8.90265	8.31368	-1.66837
ENSG00000196118	CCDC189;CCDC189	-0.718796	0.379978		5.56502	5.96707	5.13587	5.11484	-0.420241
ENSG00000135916	ITM2C;ITM2C	-0.718627	0.00174465		10.6466	10.5195	9.96855	9.76046	-2.75829
ENSG00000186594	MIR22HG;	-0.718621	0.0280581		8.37712	8.40423	7.7952	7.5604	-1.55194
ENSG00000120656	TAF12;TAF12	-0.718512	0.111091		7.22873	7.67139	6.6305	6.89412	-0.954321
ENSG00000254858	MPV17L2;MPV17L2	-0.718414	0.0970532		7.57781	7.32709	6.8562	6.6591	-1.01299
ENSG00000110881	ASIC1;ASIC1	-0.718361	0.124638		7.21772	7.32709	6.76376	6.36337	-0.904349
ENSG00000269388	;	-0.71805	0.468615		5.25613	5.93741	5.40432	4.39427	-0.329184
ENSG00000198689	SLC9A6;SLC9A6	-0.716894	0.0548913		7.78597	8.0634	7.20766	7.24933	-1.2605
ENSG00000125744	RTN2;RTN2	-0.71679	0.0959389		7.47057	7.56873	6.99821	6.62217	-1.01801
ENSG00000273619	;	-0.716688	0.510091		5.16734	5.11065	4.37702	4.66025	-0.292352
ENSG00000117226	GBP3;GBP3	-0.716606	0.409253		5.45678	6.02463	4.80577	5.37374	-0.388008
ENSG00000197766	CFD;CFD	-0.716391	0.00315003		10.6039	10.9886	10.1046	10.0839	-2.50169
ENSG00000239521	CASTOR3;CASTOR3	-0.715922	0.0115766		9.17702	9.57011	8.65638	8.69483	-1.93642
ENSG00000127666	TICAM1;TICAM1	-0.715541	0.086766		7.74053	7.6893	7.23852	6.7532	-1.06165
ENSG00000108176	DNAJC12;DNAJC12	-0.715262	0.030131		8.48209	8.93368	7.92892	8.10199	-1.52099
ENSG00000137764	MAP2K5;MAP2K5	-0.715057	0.0390007		8.22594	8.20082	7.64781	7.35815	-1.40893
ENSG00000138175	ARL3;ARL3	-0.714836	0.0201816		8.72698	9.00333	8.29096	8.02391	-1.69505
ENSG00000172819	RARG;RARG	-0.714697	0.0247047		8.90228	8.60152	8.188	7.90596	-1.60722
ENSG00000166913	YWHAB;HEL-S-1	-0.714578	0.00155633		11.1866	11.4271	10.4956	10.6948	-2.8079
ENSG00000259207	ITGB3;ITGB3	-0.713333	0.539889		4.80486	5.21322	4.26157	4.55966	-0.267695
ENSG00000178449	COX14;COX14	-0.71231	0.019966		8.61393	8.89948	8.11088	8.00491	-1.69971
ENSG00000137486	ARRB1;ARRB1	-0.712039	0.080969		7.56917	7.90386	6.91469	7.17478	-1.09168
ENSG00000114942	EEF1B2;EEF1B2	-0.711632	0.00226518		12.8353	13.2752	12.3244	12.3961	-2.6449
ENSG00000158604	TMED4;TMED4	-0.711505	0.00190292		10.2712	10.4424	9.67482	9.62546	-2.72058
ENSG00000214389	RPS3AP26;	-0.711132	0.104802		7.27196	7.73311	6.84621	6.80904	-0.97963
ENSG00000130429	ARPC1B;ARPC1B	-0.710877	0.445884		5.1208	6.05256	5.13587	4.88473	-0.350778
ENSG00000255874	LINC00346;	-0.710346	0.482549		5.02298	5.6015	4.67651	4.75427	-0.316458
ENSG00000138764	CCNG2;CCNG2	-0.710316	0.0702719		8.04464	7.80056	7.02501	7.41683	-1.15322
ENSG00000156239	N6AMT1;N6AMT1	-0.71024	0.157583		7.01637	6.88955	6.26128	6.28677	-0.802492
ENSG00000152133	GPATCH11;GPATCH11	-0.710061	0.208737		6.62448	6.63621	5.96175	5.95179	-0.680401
ENSG00000119661	DNAL1;DNAL1	-0.71006	0.0852285		7.489	7.6163	6.92421	6.79804	-1.06942
ENSG00000159363	ATP13A2;ATP13A2	-0.709943	0.0367293		9.3534	9.21281	8.89299	8.1803	-1.43499
ENSG00000134333	LDHA;LDHA	-0.709843	0.00340286		13.6611	13.6766	12.6811	13.1925	-2.46816
ENSG00000167004	PDIA3;PDIA3	-0.70963	0.000748059		13.3741	13.6473	12.7421	12.8705	-3.12606
ENSG00000099992	TBC1D10A;TBC1D10A	-0.709477	0.15953		7.13818	6.99409	6.58319	6.15507	-0.797158
ENSG00000105655	ISYNA1;ISYNA1	-0.707525	0.00337384		9.80537	9.90496	9.19784	9.1049	-2.47188
ENSG00000169891	REPS2;REPS2	-0.707403	0.157228		6.91093	7.14445	6.23091	6.4642	-0.803471
ENSG00000111674	ENO2;ENO2	-0.707198	0.00253528		10.243	10.1654	9.58463	9.41126	-2.59597
ENSG00000237768	;	-0.70676	0.24096		6.91093	6.35138	5.8261	6.13773	-0.618055
ENSG00000178685	PARP10;PARP10	-0.705853	0.0337305		9.65225	9.42538	9.14994	8.44989	-1.47198
ENSG00000231856	;	-0.705288	0.435749		5.72911	5.35458	4.88593	4.96558	-0.360763
ENSG00000236801	RPL24P8;	-0.705288	0.147323		6.96461	7.2203	6.48366	6.34837	-0.83173
ENSG00000176022	B3GALT6;B3GALT6	-0.704389	0.0127546		10.0562	10.1829	9.66208	9.12704	-1.89433
ENSG00000103199	ZNF500;ZNF500	-0.703893	0.078533		7.74053	7.65326	7.12749	6.88375	-1.10495
ENSG00000270919	;	-0.703719	0.528227		4.86256	5.35458	4.43145	4.61083	-0.277179
ENSG00000174628	IQCK;IQCK	-0.703617	0.0362541		8.1982	8.22557	7.55278	7.48698	-1.44064
ENSG00000149547	EI24;EI24	-0.703094	0.00286216		10.3015	10.507	9.62752	9.78295	-2.54331
ENSG00000163683	SMIM14;SMIM14	-0.70303	0.00362478		9.88932	10.0489	9.21346	9.32771	-2.44072
ENSG00000244313	;	-0.70259	0.433975		9.07087	10.0678	8.67624	9.18938	-0.362536
ENSG00000272702	;	-0.70256	0.501598		4.91804	5.77921	4.48391	5.04214	-0.299644
ENSG00000254901	BORCS8;BORCS8	-0.701983	0.413722		6.20112	5.5238	5.58327	4.84254	-0.383292
ENSG00000139835	GRTP1;GRTP1	-0.701804	0.274809		6.2667	6.39568	5.58327	5.76113	-0.560969
ENSG00000074219	TEAD2;TEAD2	-0.701775	0.0263905		8.67559	8.54364	7.78478	8.04267	-1.57855
ENSG00000068079	IFI35;IFI35	-0.701753	0.00424991		9.71233	9.64083	8.97086	8.98881	-2.37162
ENSG00000165714	BORCS5;BORCS5	-0.701698	0.106139		7.33446	7.784	6.80557	6.97446	-0.974127
ENSG00000254815	LMNTD2-AS1;	-0.701649	0.548538		5.21241	4.94167	4.80577	4.06793	-0.260794
ENSG00000084693	AGBL5;AGBL5	-0.701441	0.00186613		10.6599	10.4789	9.8954	9.85103	-2.72906
ENSG00000259120	SMIM6;SMIM6	-0.701019	0.281819		6.34975	6.2343	5.58327	5.69153	-0.55003
ENSG00000143774	GUK1;GUK1	-0.700934	0.00294191		10.7657	11.0788	10.2992	10.1599	-2.53137
ENSG00000117308	GALE;GALE	-0.699976	0.00276156		10.6741	10.5639	10.0458	9.78712	-2.55885
ENSG00000143126	CELSR2;CELSR2	-0.699803	0.137034		8.06322	7.70698	7.57713	6.71863	-0.863173
ENSG00000113621	TXNDC15;TXNDC15	-0.699802	0.00522891		9.61286	9.7408	9.04037	8.922	-2.28159
ENSG00000171161	ZNF672;ZNF672	-0.699581	0.0102497		9.29958	9.40385	8.77953	8.52517	-1.98929
ENSG00000180964	TCEAL8;TCEAL8	-0.699159	0.0115766		9.02738	9.16242	8.3522	8.45339	-1.93642
ENSG00000258947	TUBB3;TUBB3	-0.698848	0.587936		4.86256	4.68034	4.26157	4.13937	-0.23067
ENSG00000077463	SIRT6;SIRT6	-0.698778	0.0366072		8.80998	9.16562	8.53111	8.038	-1.43643
ENSG00000165548	TMEM63C;TMEM63C	-0.698701	0.466536		5.66569	5.48332	5.32027	4.45154	-0.331115
ENSG00000111775	COX6A1;COX6A1	-0.698372	0.0838205		8.65124	9.4804	8.11919	8.68889	-1.07665
ENSG00000240303	ACAD11;ACAD11	-0.698371	0.614149		4.39974	5.21322	3.6768	4.70802	-0.211726
ENSG00000180867	PDIA3P1;	-0.698035	0.028431		8.54511	8.89562	7.95703	8.11976	-1.54621
ENSG00000153485	TMEM251;	-0.698009	0.304904		6.22331	6.43866	5.34883	5.95179	-0.515837
ENSG00000133636	NTS;NTS	-0.697816	0.1482		7.21772	7.8571	6.6305	7.114	-0.829152
ENSG00000184557	SOCS3;SOCS3	-0.697526	0.0117948		9.49467	9.18468	8.68747	8.62499	-1.92831
ENSG00000214485	RPL7P1;	-0.697116	0.00221217		10.9392	11.2355	10.3913	10.407	-2.65518
ENSG00000156172	C8orf37;C8orf37	-0.696769	0.142286		7.04157	7.38317	6.47072	6.62217	-0.846837
ENSG00000205084	TMEM231;TMEM231	-0.696709	0.144511		7.01637	7.2806	6.45767	6.50534	-0.840098
ENSG00000237118	CYP2F2P;	-0.696489	0.524448		5.1208	5.16285	4.67651	4.39427	-0.280298
ENSG00000072849	DERL2;DERL2	-0.696317	0.00427623		10.4711	10.8281	9.92771	10.0036	-2.36894
ENSG00000059377	TBXAS1;TBXAS1	-0.695732	0.153368		7.12645	6.99409	6.33453	6.45022	-0.814264
ENSG00000172986	GXYLT2;GXYLT2	-0.694667	0.370812		5.93139	5.84459	5.34883	5.14986	-0.430847
ENSG00000219607	PPP1R3G;PPP1R3G	-0.694608	0.47339		5.81929	5.16285	4.63072	5.14986	-0.324781
ENSG00000104823	ECH1;ECH1	-0.694491	0.00127191		11.2304	11.4036	10.6847	10.5654	-2.89554
ENSG00000106351	AGFG2;HRBL	-0.694466	0.0108685		9.73953	9.57494	9.13157	8.7867	-1.96383
ENSG00000145217	SLC26A1;SLC26A1	-0.694433	0.279167		6.44725	6.50082	6.08572	5.48763	-0.554136
ENSG00000267801	;	-0.69346	0.00609585		9.6604	9.65	9.05778	8.86782	-2.21497
ENSG00000225969	ABHD11-AS1;	-0.693314	0.478405		5.29855	5.44167	4.67651	4.84254	-0.320204
ENSG00000105696	TMEM59L;C19orf4	-0.693244	0.0874024		7.73282	7.80878	7.2836	6.87331	-1.05848
ENSG00000143977	SNRPG;SNRPG	-0.692848	0.00483752		9.76245	9.77684	9.15197	9.00563	-2.31538
ENSG00000163155	LYSMD1;LYSMD1	-0.692611	0.150788		7.17281	7.00842	6.41778	6.4361	-0.821633
ENSG00000112110	MRPL18;MRPL18	-0.692467	0.0098891		9.19958	9.38749	8.62169	8.59672	-2.00484
ENSG00000167487	KLHL26;KLHL26	-0.692462	0.246109		6.42827	6.87397	6.18412	5.80573	-0.608872
ENSG00000203875	SNHG5;	-0.692401	0.002419		13.1567	13.5294	12.7489	12.5714	-2.61637
ENSG00000103024	NME3;NME3	-0.691657	0.0160366		9.29958	9.61764	8.91941	8.62499	-1.79489
ENSG00000180096	SEPTIN1;SEPTIN1	-0.690573	0.223385		7.21772	7.56873	7.17612	6.08442	-0.650946
ENSG00000247134	;	-0.690097	0.109825		7.35471	7.7923	6.84621	6.98419	-0.9593
ENSG00000162913	OBSCN-AS1;	-0.689503	0.580384		4.74475	5.00023	4.06898	4.50661	-0.236284
ENSG00000087903	RFX2;RFX2	-0.689494	0.151543		6.99072	7.33848	6.47072	6.54534	-0.819464
ENSG00000148700	ADD3;ADD3	-0.689347	0.267146		6.44725	6.56041	5.60711	6.06621	-0.573252
ENSG00000143870	PDIA6;PDIA6	-0.689225	0.000303712		13.869	13.9719	13.2285	13.2362	-3.51754
ENSG00000183248	PRR36;PRR36	-0.688757	0.641765		4.68204	4.52947	4.43145	3.54385	-0.192624
ENSG00000174903	RAB1B;RAB1B	-0.688725	0.00291914		11.0872	11.0348	10.5225	10.2085	-2.53475
ENSG00000152782	PANK1;PANK1	-0.688689	0.429576		5.59936	5.63884	5.034	4.96558	-0.36696
ENSG00000167604	NFKBID;NFKBID	-0.688559	0.425292		5.93139	5.77921	5.60711	4.70802	-0.371313
ENSG00000234975	FTH1P2;	-0.688247	0.413684		5.78985	5.63884	4.96186	5.21745	-0.383332
ENSG00000182197	EXT1;EXT1	-0.687615	0.00908855		9.42457	9.28524	8.63914	8.70958	-2.04151
ENSG00000188002	;	-0.687579	0.13498		7.16136	7.6893	6.80557	6.7532	-0.869731
ENSG00000286790	;	-0.687457	0.134725		7.28256	7.19545	6.64208	6.50534	-0.870551
ENSG00000122705	CLTA;CLTA	-0.687414	0.00172794		12.1328	12.4099	11.6663	11.5118	-2.76247
ENSG00000258944	;	-0.686978	0.55214		4.80486	5.39878	4.80577	4.20744	-0.257951
ENSG00000267751	;	-0.686797	0.291186		6.42827	6.28228	5.8858	5.51475	-0.53583
ENSG00000261105	LMO7-AS1;	-0.68679	0.320269		6.0354	6.35138	5.65365	5.45999	-0.494485
ENSG00000134825	TMEM258;TMEM258	-0.68674	0.00894842		9.7376	10.1083	9.26495	9.23698	-2.04825
ENSG00000146457	WTAP;WTAP	-0.686493	0.00897725		9.39554	9.5482	8.71242	8.86782	-2.04686
ENSG00000091542	ALKBH5;ALKBH5	-0.68638	0.000880626		11.2841	11.3391	10.6449	10.6085	-3.05521
ENSG00000223799	IL10RB-DT;	-0.686073	0.0482914		8.12346	8.08385	7.45105	7.40963	-1.31613
ENSG00000182446	NPLOC4;NPLOC4	-0.685892	0.000992308		11.531	11.5219	10.9152	10.7642	-3.00335
ENSG00000112293	GPLD1;GPLD1	-0.685666	0.284994		6.38954	6.28228	5.72076	5.66756	-0.545165
ENSG00000119013	NDUFB3;NDUFB3	-0.68552	0.0410426		8.1982	8.40423	7.65354	7.60525	-1.38677
ENSG00000008735	MAPK8IP2;MAPK8IP2	-0.685329	0.222882		7.12645	7.09157	6.82604	5.93181	-0.651924
ENSG00000181004	BBS12;BBS12	-0.685155	0.418663		5.81929	5.96707	4.76396	5.64319	-0.378136
ENSG00000102967	DHODH;DHODH	-0.685112	0.051687		8.24776	8.13047	7.64781	7.37305	-1.28662
ENSG00000128294	TPST2;TPST2	-0.685071	0.0837238		7.83003	8.17563	7.52801	7.12284	-1.07715
ENSG00000145284	SCD5;SCD5	-0.684683	0.137398		7.33446	7.88067	6.73158	7.16625	-0.86202
ENSG00000278053	DDX52;DDX52	-0.684513	0.045084		8.50944	8.65261	7.65925	8.11976	-1.34598
ENSG00000213516	RBMXL1;RBMXL1	-0.683668	0.337528		5.9581	6.70823	5.45775	5.9715	-0.471691
ENSG00000186469	GNG2;GNG2	-0.683566	0.645837		5.02298	4.88064	3.1365	5.04214	-0.189877
ENSG00000100395	L3MBTL2;L3MBTL2	-0.683402	0.0136267		9.02422	9.02464	8.36973	8.32522	-1.86561
ENSG00000205155	PSENEN;PSENEN	-0.683321	0.168773		7.34462	6.97961	6.6763	6.33321	-0.772697
ENSG00000172301	COPRS;COPRS	-0.683208	0.00881742		9.43649	9.3626	8.7769	8.66488	-2.05466
ENSG00000178927	CYBC1;CYBC1	-0.68306	0.00482521		9.92868	10.0419	9.38187	9.22676	-2.31648
ENSG00000131669	NINJ1;NINJ1	-0.682709	0.00584581		10.3565	10.1638	9.7069	9.44866	-2.23316
ENSG00000213337	ANKRD39;ANKRD39	-0.682304	0.561513		4.47566	5.71073	4.48391	4.75427	-0.25064
ENSG00000158467	AHCYL2;AHCYL2	-0.682209	0.0599633		8.0195	7.92668	7.2836	7.32789	-1.22211
ENSG00000156345	CDK20;CDK20	-0.681495	0.154134		7.37468	7.00842	6.5218	6.57141	-0.812103
ENSG00000181790	ADGRB1;ADGRB1	-0.681479	0.614751		4.61647	5.00023	4.63072	3.74046	-0.2113
ENSG00000040341	STAU2;STAU2	-0.681188	0.214216		7.38456	7.75878	6.27623	7.36562	-0.669148
ENSG00000274414	;	-0.680877	0.526125		6.13241	4.68034	5.16828	4.75427	-0.278911
ENSG00000270049	;	-0.68056	0.628403		4.68204	4.60687	4.32045	3.82956	-0.201762
ENSG00000236618	PITPNA-AS1;	-0.680461	0.0691752		7.94132	7.81695	7.24613	7.18325	-1.16005
ENSG00000101811	CSTF2;CSTF2	-0.67983	0.0310036		8.44479	8.53871	7.7952	7.84849	-1.50859
ENSG00000168234	TTC39C;TTC39C	-0.679564	0.137356		7.17281	7.57837	6.79523	6.6591	-0.862153
ENSG00000185133	INPP5J;INPP5J	-0.678402	0.463		5.52983	5.48332	4.99838	4.79908	-0.334419
ENSG00000100350	FOXRED2;FOXRED2	-0.678046	0.0508774		9.09514	8.86838	8.59511	7.96614	-1.29348
ENSG00000125772	GPCPD1;GPCPD1	-0.677512	0.0180997		9.92699	10.0558	9.03379	9.55699	-1.74233
ENSG00000237172	B3GNT9;B3GNT9	-0.677427	0.0694909		7.83003	7.9417	7.23852	7.20839	-1.15807
ENSG00000110711	AIP;AIP	-0.677249	0.00695249		9.95213	10.0899	9.47065	9.21441	-2.15786
ENSG00000198961	PJA2;PJA2	-0.677091	0.082727		8.67156	9.172	7.86608	8.59036	-1.08235
ENSG00000214253	FIS1;FIS1	-0.677072	0.00247757		10.3826	10.4477	9.73558	9.74623	-2.60597
ENSG00000266970	;	-0.677064	0.632101		4.68204	4.52947	4.13608	3.99276	-0.199213
ENSG00000175130	MARCKSL1;MARCKSL1	-0.676947	0.0604722		8.39678	8.00741	7.51547	7.5862	-1.21844
ENSG00000105323	HNRNPUL1;HNRNPUL1	-0.676587	0.0037978		12.1521	11.8316	11.4403	11.1998	-2.42047
ENSG00000250234	;	-0.676543	0.621087		5.02298	4.44767	3.84666	4.50661	-0.206848
ENSG00000117016	RIMS3;RIMS3	-0.676384	0.109605		7.489	7.54925	6.9709	6.74177	-0.960168
ENSG00000123810	B9D2;B9D2	-0.676204	0.148709		7.36473	7.361	6.93367	6.4361	-0.827663
ENSG00000173918	C1QTNF1;C1QTNF1	-0.676097	0.00492646		9.92699	9.95022	9.33087	9.19777	-2.30746
ENSG00000132286	TIMM10B;TIMM10B	-0.67606	0.0584577		8.06322	8.46266	7.56501	7.65485	-1.23316
ENSG00000277182	;	-0.675657	0.636418		4.74475	4.44767	4.20019	3.91347	-0.196257
ENSG00000107902	LHPP;LHPP	-0.675589	0.105014		7.87278	7.84916	7.45763	6.88375	-0.978754
ENSG00000174567	GOLT1A;GOLT1A	-0.675538	0.0872437		7.92787	8.00025	7.52176	7.04126	-1.05927
ENSG00000225630	MTND2P28;	-0.675531	0.58379		5.33977	4.60687	4.06898	4.75427	-0.233743
ENSG00000143315	PIGM;PIGM	-0.675448	0.108768		7.63687	7.784	6.80557	7.26539	-0.963499
ENSG00000020181	ADGRA2;ADGRA2	-0.674433	0.102206		7.948	7.80056	7.45763	6.92477	-0.990522
ENSG00000180425	C11orf71;C11orf71	-0.674228	0.269898		6.59073	6.39568	5.74245	5.9715	-0.5688
ENSG00000106330	MOSPD3;MOSPD3	-0.673708	0.0748278		7.9211	7.784	7.19984	7.19168	-1.12594
ENSG00000287242	;	-0.673707	0.020987		8.83901	8.93743	8.30196	8.13732	-1.67805
ENSG00000100804	PSMB5;PSMB5	-0.673361	0.00318521		10.2989	10.2953	9.67764	9.57321	-2.49686
ENSG00000235191	NUCB1-AS1;	-0.673177	0.0138068		10.3802	10.0695	9.74098	9.35984	-1.85991
ENSG00000083838	ZNF446;ZNF446	-0.672871	0.0478302		8.36719	8.27384	7.78478	7.52082	-1.3203
ENSG00000138073	PREB;PREB	-0.672174	0.00298761		10.945	11.2024	10.451	10.3648	-2.52468
ENSG00000121753	ADGRB2;ADGRB2	-0.672173	0.105257		8.73086	8.55345	8.36625	7.45234	-0.977749
ENSG00000128274	A4GALT;A4GALT	-0.671888	0.0587564		8.39678	8.04961	7.6129	7.53414	-1.23094
ENSG00000081760	AACS;AACS	-0.671632	0.0144236		9.61076	9.69943	9.16207	8.78948	-1.84093
ENSG00000167920	TMEM99;	-0.671149	0.0568116		8.3009	8.77923	7.77429	8.00969	-1.24556
ENSG00000112699	GMDS;GMDS	-0.67099	0.0883034		7.70154	8.13047	7.32732	7.21667	-1.05402
ENSG00000196511	TPK1;TPK1	-0.670202	0.583244		5.07272	4.75024	4.20019	4.50661	-0.23415
ENSG00000242299	;	-0.669972	0.0106422		9.45302	9.67942	8.94537	8.86255	-1.97297
ENSG00000225265	TAF1A-AS1;	-0.669669	0.547001		5.07272	5.16285	4.67651	4.39427	-0.262012
ENSG00000168806	LCMT2;LCMT2	-0.669629	0.211232		6.81189	6.79348	6.1026	6.22242	-0.675241
ENSG00000166886	NAB2;NAB2	-0.669491	0.105031		8.05705	7.93421	7.61878	6.99386	-0.978682
ENSG00000139910	NOVA1;NOVA1	-0.669373	0.379623		6.24517	5.74538	5.48374	5.31324	-0.420647
ENSG00000103145	HCFC1R1;HCFC1R1	-0.669123	0.00631864		10.6741	10.5493	10.1025	9.77034	-2.19938
ENSG00000272661	;	-0.669051	0.424311		5.78985	6.45968	4.9244	5.9715	-0.372315
ENSG00000254501	;	-0.668855	0.0268467		8.90572	9.22206	8.52173	8.2864	-1.57111
ENSG00000076662	ICAM3;ICAM3	-0.668787	0.258875		6.73674	6.61763	6.27623	5.76113	-0.58691
ENSG00000104691	UBXN8;UBXN8	-0.668765	0.143211		7.28256	7.68037	6.65358	7.01301	-0.844024
ENSG00000159214	CCDC24;CCDC24	-0.668245	0.124577		7.34462	7.60691	6.91469	6.74177	-0.904561
ENSG00000066230	SLC9A3;SLC9A3	-0.667818	0.318495		6.85517	6.3737	6.36282	5.51475	-0.496897
ENSG00000079482	OPHN1;OPHN1	-0.66774	0.339105		6.38954	5.99614	5.67637	5.48763	-0.469665
ENSG00000275395	FCGBP;FCGBP	-0.667637	0.564776		5.25613	5.16285	5.06876	3.99276	-0.248124
ENSG00000198556	ZNF789;ZNF789	-0.667356	0.414397		5.69775	5.93741	5.034	5.37374	-0.382583
ENSG00000105612	DNASE2;DNASE2	-0.667307	0.0123118		9.70249	10.0695	9.28357	9.18094	-1.90968
ENSG00000128228	SDF2L1;SDF2L1	-0.667191	0.00395917		11.4777	11.5861	11.025	10.6888	-2.4024
ENSG00000157353	FCSK;FCSK	-0.667184	0.116401		8.23143	8.15	7.88083	7.07809	-0.934042
ENSG00000178607	ERN1;ERN1	-0.667122	0.0176014		9.40285	9.11352	8.57106	8.63738	-1.75445
ENSG00000213621	RPSAP54;	-0.667052	0.482069		6.06027	5.35458	5.53437	4.61083	-0.316891
ENSG00000100897	DCAF11;DCAF11	-0.666217	0.0117948		9.52178	9.53836	8.98685	8.73863	-1.92831
ENSG00000255517	;	-0.665789	0.168287		7.04157	7.25678	6.40423	6.60965	-0.773949
ENSG00000228343	;	-0.664671	0.351655		6.52078	5.90713	5.48374	5.76113	-0.453884
ENSG00000149541	B3GAT3;B3GAT3	-0.664194	0.025444		9.46471	9.77893	9.16408	8.74437	-1.59441
ENSG00000123933	MXD4;MXD4	-0.664107	0.018654		9.48322	9.57253	9.05128	8.65882	-1.72923
ENSG00000147684	NDUFB9;NDUFB9	-0.663707	0.00294191		10.852	11.0703	10.3156	10.2902	-2.53137
ENSG00000229018	PMS2P7;	-0.663365	0.537448		5.63291	5.11065	5.19999	4.27244	-0.269663
ENSG00000163874	ZC3H12A;ZC3H12A	-0.663188	0.0130318		9.45302	9.41734	8.88569	8.65882	-1.885
ENSG00000186907	RTN4RL2;RTN4RL2	-0.663163	0.0196838		9.48552	9.43071	8.9823	8.59036	-1.70589
ENSG00000141741	MIEN1;MIEN1	-0.663027	0.0104065		9.52178	9.65912	9.00716	8.85461	-1.9827
ENSG00000013561	RNF14;RNF14	-0.661717	0.011371		9.46936	9.69943	8.95004	8.91184	-1.9442
ENSG00000153832	FBXO36;FBXO36	-0.661564	0.432601		5.69775	5.77921	5.29112	4.96558	-0.363912
ENSG00000130511	SSBP4;SSBP4	-0.661018	0.0117948		9.73374	9.96131	9.31105	9.06647	-1.92831
ENSG00000267757	EML2-AS1;	-0.660342	0.0218941		8.8745	8.85654	8.21928	8.20549	-1.65967
ENSG00000145050	MANF;MANF	-0.660096	0.001888		11.5248	11.4936	10.9371	10.7578	-2.724
ENSG00000131697	NPHP4;NPHP4	-0.659571	0.1482		7.50721	7.38317	7.01613	6.55844	-0.829152
ENSG00000267992	;	-0.659426	0.437719		5.7598	5.71073	5.32027	4.92572	-0.358805
ENSG00000258232	;	-0.65908	0.00821844		10.7686	11.1573	10.3965	10.2352	-2.08521
ENSG00000287200	;	-0.658495	0.374873		5.84815	6.30568	5.60711	5.34381	-0.426116
ENSG00000254978	ALG1L9P;	-0.658359	0.643483		5.37984	3.95015	4.37702	4.20744	-0.191463
ENSG00000234327	;	-0.657954	0.314315		6.78229	6.13327	5.98012	5.76113	-0.502635
ENSG00000186281	GPAT2;GPAT2	-0.657597	0.476634		5.45678	5.56317	4.96186	4.88473	-0.321815
ENSG00000102871	TRADD;TRADD	-0.657294	0.0268318		8.94297	9.14954	8.52173	8.2626	-1.57135
ENSG00000137821	LRRC49;LRRC49	-0.656936	0.415605		5.84815	6.32872	4.99838	5.87015	-0.38132
ENSG00000158985	CDC42SE2;CDC42SE2	-0.656788	0.0441987		9.8701	10.1396	8.96626	9.66534	-1.35459
ENSG00000165905	LARGE2;LARGE2	-0.656705	0.434878		5.93139	5.6015	4.99838	5.34381	-0.361633
ENSG00000144589	STK11IP;STK11IP	-0.656669	0.0995388		8.35216	8.14352	7.89058	7.24933	-1.00201
ENSG00000177380	PPFIA3;PPFIA3	-0.656616	0.274284		6.97773	6.35138	6.08572	6.06621	-0.5618
ENSG00000138696	BMPR1B;BMPR1B	-0.656453	0.236977		6.89719	7.15737	6.01619	6.70692	-0.625294
ENSG00000175183	CSRP2;CSRP2	-0.655591	0.424281		6.01009	5.6015	5.23101	5.21745	-0.372346
ENSG00000198736	MSRB1;MSRB1	-0.654622	0.0175632		9.35088	9.69279	8.87346	8.8887	-1.7554
ENSG00000178464	RPL10P16;	-0.654529	0.00510375		10.7099	10.8729	10.2518	10.0203	-2.29211
ENSG00000102030	NAA10;NAA10	-0.654109	0.0475893		8.51844	8.34334	7.87593	7.6969	-1.32249
ENSG00000161270	NPHS1;NPHS1	-0.653501	0.183238		7.54294	7.05059	6.84621	6.50534	-0.736985
ENSG00000224631	RPS27AP16;	-0.653019	0.0412647		9.5128	10.0882	8.9823	9.35235	-1.38442
ENSG00000179715	PCED1B;PCED1B	-0.65291	0.00635722		10.1123	9.99949	9.35396	9.45917	-2.19673
ENSG00000116663	FBXO6;FBXO6	-0.652811	0.183112		7.01637	7.29236	6.65358	6.3929	-0.737283
ENSG00000187626	ZKSCAN4;ZKSCAN4	-0.652519	0.409542		6.08472	5.74538	5.48374	5.14986	-0.387702
ENSG00000237380	HOXD-AS2;	-0.652336	0.567938		4.61647	5.63884	4.63072	4.66025	-0.245699
ENSG00000126267	COX6B1;COX6B1	-0.652312	0.00433831		11.6345	11.9537	11.0867	11.2133	-2.36268
ENSG00000120915	EPHX2;EPHX2	-0.651949	0.203961		6.92454	7.38317	6.72069	6.33321	-0.690452
ENSG00000265907	;	-0.651706	0.389552		6.22331	5.77921	5.37684	5.45999	-0.409435
ENSG00000178297	TMPRSS9;TMPRSS9	-0.651507	0.568537		4.86256	5.30898	4.7209	4.33464	-0.245242
ENSG00000160211	G6PD;G6PD	-0.651422	0.00150254		13.887	13.7687	13.2767	13.0717	-2.82317
ENSG00000120055	C10orf95;C10orf95	-0.650752	0.578345		4.91804	5.11065	4.63072	4.27244	-0.237813
ENSG00000259736	CRTC3-AS1;	-0.650728	0.481709		5.72911	5.8762	5.65365	4.55966	-0.317215
ENSG00000287559	;	-0.650703	0.547298		5.59936	4.88064	4.53452	4.88473	-0.261776
ENSG00000143153	ATP1B1;ATP1B1	-0.65056	0.00803898		11.7792	11.9048	10.9599	11.3949	-2.0948
ENSG00000135823	STX6;STX6	-0.650464	0.0165496		9.15409	9.22206	8.51545	8.57111	-1.78121
ENSG00000174173	TRMT10C;TRMT10C	-0.65018	0.188742		7.28256	7.95656	6.70972	7.28127	-0.724131
ENSG00000083807	SLC27A5;SLC27A5	-0.650066	0.0550623		8.73086	8.83659	8.37669	7.85911	-1.25915
ENSG00000125995	ROMO1;ROMO1	-0.650031	0.00627593		10.5837	10.8816	10.0556	10.1274	-2.20232
ENSG00000119523	ALG2;ALG2	-0.649989	0.0232343		9.19678	9.57494	8.7769	8.72708	-1.63387
ENSG00000112695	COX7A2;COX7A2	-0.649339	0.00518919		10.3389	10.5158	9.81834	9.74623	-2.2849
ENSG00000100220	RTCB;RTCB	-0.649299	0.00761038		10.2792	10.5748	9.76635	9.80783	-2.11859
ENSG00000129472	RAB2B;RAB2B	-0.649205	0.133584		7.9211	7.6893	7.43116	6.8628	-0.874246
ENSG00000147123	NDUFB11;NDUFB11	-0.648847	0.00343833		11.2214	11.4463	10.7416	10.6373	-2.46365
ENSG00000008323	PLEKHG6;PLEKHG6	-0.648728	0.586308		5.02298	5.00023	4.7209	4.13937	-0.231874
ENSG00000224699	LAMTOR5-AS1;	-0.648636	0.0366018		9.03367	8.70196	8.30196	8.16754	-1.4365
ENSG00000137210	TMEM14B;TMEM14B	-0.648293	0.0278949		9.86834	10.4345	9.43779	9.62235	-1.55447
ENSG00000022267	FHL1;FHL1	-0.647662	0.0057382		10.1403	10.0627	9.45923	9.45567	-2.24122
ENSG00000112357	PEX7;PEX7	-0.647145	0.335152		6.24517	7.00842	5.69873	6.34837	-0.474758
ENSG00000185813	PCYT2;PCYT2	-0.646952	0.0505253		9.42935	9.323	9.02275	8.37416	-1.29649
ENSG00000222009	BTBD19;BTBD19	-0.646776	0.48068		6.13241	5.99614	6.01619	4.55966	-0.318144
ENSG00000247735	;	-0.646759	0.512585		5.41882	5.56317	5.23101	4.50661	-0.290234
ENSG00000064932	SBNO2;SBNO2	-0.646684	0.0234101		10.8466	10.6882	10.3888	9.80096	-1.6306
ENSG00000127580	WDR24;WDR24	-0.646496	0.10988		8.05086	7.91912	7.59513	7.05979	-0.959082
ENSG00000102144	PGK1;HEL-S-68p	-0.646453	0.00372063		13.6506	13.7777	12.8883	13.2303	-2.42938
ENSG00000184060	ADAP2;ADAP2	-0.646253	0.365898		5.9581	6.32872	5.48374	5.6184	-0.43664
ENSG00000275183	LENG9;LENG9	-0.645906	0.172383		7.57781	7.68037	7.32013	6.58427	-0.763506
ENSG00000171425	ZNF581;ZNF581	-0.645397	0.0134177		9.7182	9.77265	9.23466	8.9595	-1.87232
ENSG00000122729	ACO1;ACO1	-0.645158	0.00931618		9.84527	9.76844	9.0962	9.2329	-2.03076
ENSG00000179387	ELMOD2;ELMOD2	-0.645134	0.172435		7.10271	7.58794	6.6763	6.79804	-0.763374
ENSG00000160209	PDXK;PDXK	-0.645003	0.00260946		12.1582	12.2514	11.6738	11.4389	-2.58345
ENSG00000175567	UCP2;UCP2	-0.644701	0.0281451		9.08911	9.37094	8.71516	8.46734	-1.5506
ENSG00000164136	IL15;IL15	-0.644563	0.109026		7.79341	7.66235	7.21543	6.97446	-0.96247
ENSG00000160226	CFAP410;CFAP410	-0.644465	0.0971238		7.73282	7.91912	7.26873	7.12284	-1.01267
ENSG00000168101	NUDT16L1;NUDT16L1	-0.644461	0.0495554		8.33187	8.3988	7.76372	7.6969	-1.30491
ENSG00000175348	TMEM9B;TMEM9B	-0.644314	0.0162447		9.24639	9.24948	8.58013	8.63738	-1.78929
ENSG00000113211	PCDHB6;PCDHB6	-0.644277	0.592453		5.37984	4.60687	4.32045	4.66025	-0.227346
ENSG00000198455	ZXDB;ZXDB	-0.644111	0.155125		7.39437	7.4158	6.58319	6.95479	-0.809319
ENSG00000162078	ZG16B;ZG16B	-0.64409	0.61034		4.91804	4.81691	4.13608	4.50661	-0.214428
ENSG00000160255	ITGB2;ITGB2	-0.64408	0.285885		6.65745	6.50082	6.13576	5.7836	-0.543808
ENSG00000070214	SLC44A1;SLC44A1	-0.644054	0.0478302		9.20517	9.37371	8.33446	8.91439	-1.3203
ENSG00000268093	;	-0.643814	0.563441		5.63291	5.2619	5.40432	4.06793	-0.249151
ENSG00000157036	EXOG;EXOG	-0.643251	0.210162		6.96461	7.07804	6.21548	6.57141	-0.677446
ENSG00000174165	ZDHHC24;ZDHHC24	-0.643192	0.0165428		9.52848	9.76633	9.11087	8.90673	-1.78139
ENSG00000287431	;	-0.643127	0.584504		4.97146	5.00023	4.43145	4.45154	-0.233212
ENSG00000197021	EOLA2;CXorf40B	-0.642962	0.0185999		9.19397	9.38475	8.61582	8.69187	-1.73049
ENSG00000164120	HPGD;HPGD	-0.642903	0.0516063		8.76907	8.94862	7.97546	8.43931	-1.2873
ENSG00000170581	STAT2;STAT2	-0.642088	0.0366326		8.59277	8.71513	7.98914	8.05196	-1.43613
ENSG00000223478	;	-0.641628	0.494686		5.49377	5.77921	5.40432	4.61083	-0.30567
ENSG00000063241	ISOC2;ISOC2	-0.641604	0.00666662		10.4383	10.6498	9.97887	9.83363	-2.17609
ENSG00000204175	GPRIN2;GPRIN2	-0.641353	0.0162447		9.53515	9.43867	8.95236	8.7415	-1.78929
ENSG00000011295	TTC19;TTC19	-0.640711	0.00721483		9.99307	9.98143	9.31105	9.38762	-2.14177
ENSG00000169992	NLGN2;NLGN2	-0.640533	0.131167		7.98094	7.75027	7.49005	6.94485	-0.882175
ENSG00000119638	NEK9;NEK9	-0.640407	0.0114447		9.67255	9.68165	8.96395	9.1138	-1.9414
ENSG00000269487	;	-0.640353	0.112289		8.39678	7.96394	7.7952	7.29698	-0.949663
ENSG00000214655	ZSWIM8;ZSWIM8	-0.639725	0.049012		9.78127	9.33443	9.16207	8.67694	-1.3097
ENSG00000104361	NIPAL2;NIPAL2	-0.639209	0.541626		5.59936	5.21322	4.37702	5.21745	-0.2663
ENSG00000275120	;	-0.638951	0.25193		6.65745	6.90495	6.29103	6.04776	-0.59872
ENSG00000226742	HSBP1L1;HSBP1L1	-0.638641	0.0647348		8.22594	8.60624	7.77429	7.82159	-1.18886
ENSG00000134780	DAGLA;DAGLA	-0.63826	0.22221		8.10565	7.4686	7.58315	6.67121	-0.653237
ENSG00000205771	CATSPER2P1;	-0.638062	0.0116314		11.3296	11.7813	10.8586	11.0092	-1.93437
ENSG00000099822	HCN2;HCN2	-0.636724	0.0166594		10.9044	10.8914	10.4932	9.98796	-1.77834
ENSG00000143891	GALM;GALM	-0.636564	0.028816		8.88846	8.89176	8.31649	8.20132	-1.54037
ENSG00000149150	SLC43A1;SLC43A1	-0.636534	0.150261		7.67763	8.10402	7.54663	6.95479	-0.823153
ENSG00000169764	UGP2;UGP2	-0.636234	0.0382639		10.2552	10.6971	9.56802	10.1008	-1.41721
ENSG00000135069	PSAT1;PSAT1	-0.636026	0.00261648		12.0268	12.172	11.3853	11.5422	-2.58228
ENSG00000168803	ADAL;ADAL	-0.635486	0.344124		6.34975	6.67267	5.50928	6.23878	-0.463285
ENSG00000164414	SLC35A1;SLC35A1	-0.635381	0.576312		4.91804	5.30898	4.32045	4.79908	-0.239343
ENSG00000167380	ZNF226;ZNF226	-0.634692	0.130379		7.64512	7.784	6.88574	7.28127	-0.884792
ENSG00000137713	PPP2R1B;PPP2R1B	-0.634691	0.147546		7.948	8.3032	7.09413	7.83779	-0.831074
ENSG00000221926	TRIM16;TRIM16	-0.634647	0.00294191		11.5839	11.7808	11.0524	11.0514	-2.53137
ENSG00000254615	;	-0.634498	0.644618		4.74475	4.75024	4.53452	3.82956	-0.190698
ENSG00000233762	RPS15P4;	-0.634448	0.115787		8.07547	8.60624	7.46417	7.97104	-0.936342
ENSG00000157152	SYN2;SYN2	-0.6344	0.10822		7.86574	8.25593	7.61878	7.25738	-0.965691
ENSG00000079277	MKNK1;MKNK1	-0.633855	0.109516		7.80817	7.70698	7.23086	7.04126	-0.96052
ENSG00000172428	COPS9;COPS9	-0.633776	0.0419616		8.71136	9.08337	8.27987	8.28246	-1.37715
ENSG00000161558	TMEM143;TMEM143	-0.63328	0.204958		7.02902	7.10497	6.58319	6.3179	-0.688334
ENSG00000243004	;	-0.632962	0.519149		5.49377	5.30898	4.80577	4.88473	-0.284708
ENSG00000162298	SYVN1;SYVN1	-0.632931	0.0263373		10.1848	10.0226	9.70137	9.20819	-1.57943
ENSG00000111252	SH2B3;SH2B3	-0.632836	0.0497903		8.40651	8.46266	7.80038	7.82159	-1.30286
ENSG00000129235	TXNDC17;TXNDC17	-0.632577	0.0194569		9.94212	10.3763	9.4996	9.58924	-1.71093
ENSG00000287896	;	-0.632409	0.233613		6.91093	6.82622	6.33453	6.18914	-0.631504
ENSG00000175581	MRPL48;MRPL48	-0.632171	0.0348412		8.84975	9.172	8.40417	8.38155	-1.45791
ENSG00000149823	VPS51;VPS51	-0.631894	0.0115721		11.1588	11.2812	10.7834	10.3676	-1.93659
ENSG00000111186	WNT5B;WNT5B	-0.631893	0.64913		4.61647	4.68034	4.13608	4.13937	-0.187668
ENSG00000115295	CLIP4;CLIP4	-0.631792	0.0157745		10.0655	10.2017	9.32189	9.66987	-1.80205
ENSG00000072195	SPEG;SPEG	-0.631577	0.460952		6.24517	5.6015	5.69873	4.96558	-0.336344
ENSG00000240230	COX19;COX19	-0.631421	0.0730148		8.11755	8.33199	7.68189	7.52749	-1.13659
ENSG00000227220	;	-0.631249	0.455444		5.81929	5.63884	5.13587	5.18405	-0.341565
ENSG00000183172	SMDT1;SMDT1	-0.631044	0.0580796		8.53628	8.8723	8.22314	7.94137	-1.23598
ENSG00000223764	LINC02593;	-0.630939	0.53559		5.37984	5.77921	5.45775	4.39427	-0.271168
ENSG00000119402	FBXW2;FBXW2	-0.630465	0.0168303		9.6358	9.75787	8.94068	9.19148	-1.77391
ENSG00000183770	FOXL2;FOXL2	-0.630003	0.436825		6.24517	5.74538	5.72076	5.07895	-0.359693
ENSG00000157350	ST3GAL2;ST3GAL2	-0.629744	0.0110621		9.98821	9.97962	9.45923	9.24712	-1.95616
ENSG00000132517	SLC52A1;SLC52A1	-0.629579	0.640553		4.80486	4.75024	4.53452	3.91347	-0.193445
ENSG00000188112	C6orf132;C6orf132	-0.629371	0.529678		5.59936	5.16285	4.88593	4.79908	-0.275988
ENSG00000273763	;	-0.628628	0.0975302		7.85156	7.8571	7.26124	7.21667	-1.01086
ENSG00000188385	JAKMIP3;JAKMIP3	-0.628018	0.270761		7.06634	6.65456	6.48366	6.02907	-0.567414
ENSG00000196465	MYL6B;MYL6B	-0.627943	0.0132709		9.8345	9.77265	9.27615	9.0756	-1.8771
ENSG00000122783	CYREN;CYREN	-0.627092	0.0107216		9.92191	10.1033	9.35396	9.42741	-1.96974
ENSG00000189043	NDUFA4;NDUFA4	-0.62708	0.0037585		11.1082	11.2086	10.4779	10.5871	-2.42499
ENSG00000130741	EIF2S3;EIF2S3	-0.626919	0.00462598		12.164	12.3647	11.5245	11.7498	-2.3348
ENSG00000078246	TULP3;TULP3	-0.626752	0.0779922		8.34711	8.0634	7.59513	7.59893	-1.10795
ENSG00000250644	;	-0.62671	0.647282		4.68204	4.68034	4.13608	4.20744	-0.188907
ENSG00000113328	CCNG1;CCNG1	-0.626437	0.0417401		10.1108	10.6882	9.6114	9.97338	-1.37945
ENSG00000001630	CYP51A1;CYP51A1	-0.626061	0.366452		6.30882	6.13327	5.50928	5.76113	-0.435983
ENSG00000162076	FLYWCH2;FLYWCH2	-0.625991	0.0479992		8.91256	8.68421	8.31287	8.04267	-1.31877
ENSG00000240204	SMKR1;SMKR1	-0.625931	0.198188		7.39437	7.06438	6.76376	6.49176	-0.702922
ENSG00000196981	WDR5B;WDR5B	-0.625404	0.311922		6.52078	6.90495	5.78488	6.40744	-0.505955
ENSG00000226137	BAIAP2-DT;	-0.624951	0.100477		7.96127	7.87286	7.41098	7.19168	-0.997931
ENSG00000060982	BCAT1;BCAT1	-0.624929	0.163113		7.489	7.59746	6.68752	7.14904	-0.787512
ENSG00000232803	SLCO4A1-AS1;	-0.624371	0.574028		5.37984	5.35458	4.13608	5.28201	-0.241067
ENSG00000066923	STAG3;STAG3	-0.624361	0.0656419		8.33697	8.21942	7.68189	7.64875	-1.18282
ENSG00000167676	PLIN4;PLIN4	-0.624124	0.548538		5.63291	5.00023	4.7209	4.88473	-0.260794
ENSG00000006071	ABCC8;ABCC8	-0.623956	0.640052		5.37984	4.26869	4.58342	4.20744	-0.193785
ENSG00000184985	SORCS2;SORCS2	-0.623301	0.162772		7.39437	7.33848	6.82604	6.69511	-0.788422
ENSG00000170421	KRT8;KRT8	-0.622435	0.00110952		15.1848	15.1786	14.5904	14.5276	-2.95487
ENSG00000250509	;	-0.621721	0.127382		7.9211	7.75027	7.41098	7.02249	-0.894891
ENSG00000274859	;	-0.621572	0.57495		5.33977	4.94167	4.67651	4.55966	-0.24037
ENSG00000054148	PHPT1;PHPT1	-0.621551	0.0143555		10.4383	10.2048	9.82852	9.57482	-1.84298
ENSG00000273117	;	-0.6213	0.334682		6.50274	6.32872	5.96175	5.69153	-0.475368
ENSG00000129951	PLPPR3;PLPPR3	-0.62109	0.166604		7.45189	7.31561	6.87596	6.68321	-0.778314
ENSG00000161204	ABCF3;ABCF3	-0.621043	0.0468796		8.59703	8.58248	8.02055	7.93134	-1.32902
ENSG00000167553	TUBA1C;TUBA1C	-0.620969	0.00291914		11.6748	11.8026	11.1398	11.0998	-2.53475
ENSG00000188266	HYKK;HYKK	-0.620828	0.416448		5.9581	5.96707	5.34883	5.43181	-0.380439
ENSG00000125618	PAX8;PAX8	-0.62078	0.499093		5.81929	5.44167	5.32027	4.79908	-0.301819
ENSG00000133131	MORC4;MORC4	-0.62058	0.0625946		9.19397	9.47267	8.40757	8.98396	-1.20346
ENSG00000013583	HEBP1;HEBP1	-0.620536	0.0147133		9.68859	9.89535	9.18601	9.17032	-1.83229
ENSG00000255118	;	-0.62052	0.633962		4.91804	4.75024	4.53452	4.06793	-0.197937
ENSG00000197558	SSPO;	-0.620362	0.669712		4.91804	4.26869	4.32045	3.91347	-0.174112
ENSG00000120899	PTK2B;PTK2B	-0.620356	0.0637176		8.42099	8.29738	7.69307	7.80521	-1.19574
ENSG00000183762	KREMEN1;KREMEN1	-0.620243	0.166694		7.64512	7.31561	6.76376	7.00347	-0.77808
ENSG00000109501	WFS1;WFS1	-0.619888	0.0656419		9.2491	8.95604	8.73423	8.20964	-1.18282
ENSG00000136522	MRPL47;MRPL47	-0.6198	0.128083		7.81549	8.31479	7.29832	7.63645	-0.892509
ENSG00000163644	PPM1K;PPM1K	-0.619465	0.605145		4.86256	5.11065	4.58342	4.33464	-0.218141
ENSG00000078668	VDAC3;VDAC3	-0.619218	0.0260549		10.2765	10.696	9.71926	10.032	-1.58411
ENSG00000198886	MT-ND4;MT-ND4	-0.619216	0.0263373		14.2006	13.7793	13.1052	13.6214	-1.57943
ENSG00000185090	MANEAL;MANEAL	-0.619102	0.12875		7.87978	7.57837	7.14388	7.12284	-0.890254
ENSG00000197620	EOLA1;CXorf40A	-0.618986	0.125925		7.65331	7.6893	7.11922	7.01301	-0.899888
ENSG00000088992	TESC;TESC	-0.618552	0.00955567		10.2335	10.449	9.73287	9.72461	-2.01974
ENSG00000172936	MYD88;MYD88	-0.617892	0.0399985		8.80998	9.09685	8.35924	8.33666	-1.39796
ENSG00000286859	;	-0.617824	0.258462		6.70554	6.95021	6.30567	6.17221	-0.587604
ENSG00000162227	TAF6L;TAF6L	-0.617789	0.0654388		8.39189	8.70636	8.0294	7.85911	-1.18416
ENSG00000152778	IFIT5;IFIT5	-0.617762	0.121403		7.79341	8.02866	7.12749	7.47322	-0.915772
ENSG00000139719	VPS33A;VPS33A	-0.617746	0.106139		7.89368	8.00741	7.47717	7.20006	-0.974127
ENSG00000167565	SERTAD3;SERTAD3	-0.616837	0.0209327		9.29958	9.29404	8.69861	8.67092	-1.67917
ENSG00000266074	BAHCC1;BAHCC1	-0.61632	0.190553		8.40165	7.90386	7.93364	7.07809	-0.719985
ENSG00000226085	UQCRFS1P1;	-0.616296	0.21991		6.95138	7.49937	6.55895	6.74177	-0.657755
ENSG00000205593	DENND6B;DENND6B	-0.615705	0.323344		6.70554	6.59881	6.34874	5.7151	-0.490335
ENSG00000161653	NAGS;NAGS	-0.615509	0.684731		4.61647	4.60687	3.48424	4.55966	-0.16448
ENSG00000152147	GEMIN6;GEMIN6	-0.615245	0.0996074		7.97441	8.41504	7.64205	7.5669	-1.00171
ENSG00000137691	CFAP300;CFAP300	-0.615037	0.238756		6.93802	6.9202	6.41778	6.25496	-0.622045
ENSG00000163931	TKT;HEL107	-0.61494	0.00239519		14.5807	14.4341	13.9629	13.8225	-2.62066
ENSG00000055732	MCOLN3;MCOLN3	-0.61469	0.641721		4.86256	4.68034	4.20019	4.33464	-0.192654
ENSG00000215271	HOMEZ;HOMEZ	-0.61442	0.186368		7.34462	7.19545	6.74238	6.60965	-0.729629
ENSG00000170442	KRT86;KRT86	-0.61439	0.0213923		9.93205	10.1734	9.28726	9.58924	-1.66974
ENSG00000233476	EEF1A1P6;	-0.614321	0.245874		7.50721	8.40423	7.76372	6.96466	-0.609288
ENSG00000227533	SLC2A1-AS1;	-0.614132	0.661104		4.86256	4.44767	4.06898	4.27244	-0.17973
ENSG00000229944	EIF4EP2;	-0.614105	0.445775		5.66569	6.28228	5.23101	5.6184	-0.350884
ENSG00000028839	TBPL1;TBPL1	-0.613788	0.146563		7.47982	7.70698	7.0686	6.92477	-0.833975
ENSG00000214654	B3GNT10;B3GNT10	-0.613668	0.186964		7.36473	7.19545	6.76376	6.60965	-0.728243
ENSG00000232442	MHENCR;	-0.613643	0.565298		5.49377	5.00023	4.84641	4.61083	-0.247722
ENSG00000106400	ZNHIT1;ZNHIT1	-0.613491	0.0357738		9.85774	10.2865	9.63624	9.29679	-1.44644
ENSG00000214185	XPOTP1;	-0.613391	0.663448		4.80486	4.52947	3.92464	4.39427	-0.178193
ENSG00000279246	;	-0.613328	0.284776		6.6077	6.75998	6.15206	6.04776	-0.545497
ENSG00000228889	UBAC2-AS1;	-0.613168	0.66858		4.86256	4.36095	3.99861	4.27244	-0.174847
ENSG00000136710	CCDC115;MGC12981	-0.612822	0.0373881		8.80998	8.87621	8.21541	8.25859	-1.42727
ENSG00000112812	PRSS16;PRSS16	-0.612425	0.0911192		8.23143	8.00741	7.45763	7.5862	-1.04039
ENSG00000160172	FAM86C2P;	-0.612424	0.219182		7.20662	6.95021	6.45767	6.53213	-0.659195
ENSG00000164169	PRMT9;PRMT9	-0.612153	0.510404		5.59936	5.84459	4.67651	5.54137	-0.292086
ENSG00000168765	GSTM4;GSTM4	-0.611711	0.367291		6.17858	6.35138	5.74245	5.64319	-0.43499
ENSG00000188010	MORN2;MORN2	-0.611406	0.208557		7.05401	7.4686	6.57112	6.78696	-0.680775
ENSG00000260136	;	-0.611348	0.201361		7.28256	7.20793	6.48366	6.80904	-0.696025
ENSG00000224837	GCSHP5;	-0.610997	0.423179		5.98433	6.07997	5.65365	5.25009	-0.373476
ENSG00000108465	CDK5RAP3;CDK5RAP3	-0.610701	0.543452		5.52983	5.21322	4.9244	4.75427	-0.264839
ENSG00000247033	;	-0.610374	0.468789		5.9581	5.63884	5.40432	5.07895	-0.329023
ENSG00000148303	RPL7A;RPL7A	-0.610063	0.00534757		14.9828	15.3101	14.58	14.5106	-2.27184
ENSG00000027075	PRKCH;PRKCH	-0.609996	0.183863		7.2505	7.33848	6.65358	6.7532	-0.735507
ENSG00000198934	MAGEE1;MAGEE1	-0.609847	0.622418		5.84815	4.26869	4.7209	4.75427	-0.205918
ENSG00000137218	FRS3;FRS3	-0.609408	0.415852		6.40904	6.10687	6.03389	5.25009	-0.381061
ENSG00000176386	CDC26;CDC26	-0.6094	0.208866		7.17281	7.07804	6.57112	6.50534	-0.680131
ENSG00000062716	VMP1;VMP1	-0.608936	0.020177		11.3264	11.4891	10.5427	11.0222	-1.69514
ENSG00000172974	;	-0.608636	0.0537712		8.63891	8.62031	8.11919	7.93134	-1.26945
ENSG00000228929	RPS13P2;	-0.608531	0.554714		5.02298	5.67523	4.84641	4.84254	-0.255931
ENSG00000107223	EDF1;EDF1	-0.608337	0.00805068		11.4691	11.2619	10.8605	10.6565	-2.09417
ENSG00000286388	;	-0.608232	0.116		7.88675	7.7923	7.17612	7.31251	-0.935542
ENSG00000238103	RPL9P7;	-0.60818	0.70765		5.1208	3.69049	4.37702	3.74046	-0.150181
ENSG00000162191	UBXN1;UBXN1	-0.608149	0.012745		11.0651	11.2753	10.7151	10.4016	-1.89466
ENSG00000008283	CYB561;CYB561	-0.607983	0.00917728		10.3578	10.493	9.86976	9.77034	-2.03729
ENSG00000140718	FTO;FTO	-0.607905	0.0672625		8.33697	8.40965	7.81581	7.73199	-1.17223
ENSG00000137491	SLCO2B1;SLCO2B1	-0.607883	0.354299		6.48448	6.65456	6.30567	5.59318	-0.45063
ENSG00000145725	PPIP5K2;PPIP5K2	-0.607837	0.425699		5.98433	6.63621	5.32027	6.12018	-0.370898
ENSG00000261684	;	-0.6075	0.209417		7.53409	8.33767	7.09413	7.64261	-0.678987
ENSG00000124574	ABCC10;ABCC10	-0.607248	0.15669		8.24776	8.03568	7.86608	7.14036	-0.804959
ENSG00000106993	CDC37L1;CDC37L1	-0.607059	0.119736		7.86574	8.00741	7.17612	7.49381	-0.921775
ENSG00000117461	PIK3R3;PIK3R3	-0.606974	0.580331		5.1208	5.21322	4.76396	4.50661	-0.236324
ENSG00000124217	MOCS3;MOCS3	-0.606957	0.105868		7.96127	8.03568	7.52176	7.27335	-0.975235
ENSG00000103152	MPG;MPG	-0.606871	0.015615		10.4035	10.5986	10.0338	9.75051	-1.80646
ENSG00000160783	PMF1;PMF1	-0.606731	0.128424		7.69361	8.07025	7.26124	7.33551	-0.891354
ENSG00000114744	COMMD2;COMMD2	-0.606615	0.0653957		8.49583	8.56804	7.80038	8.05658	-1.18445
ENSG00000237813	;	-0.606555	0.561801		5.1208	5.44167	4.84641	4.66025	-0.250418
ENSG00000267458	;	-0.606509	0.0123764		11.9365	11.774	11.4294	11.0491	-1.90741
ENSG00000124813	RUNX2;RUNX2	-0.606458	0.640553		5.29855	4.68034	4.9244	3.91347	-0.193445
ENSG00000198624	CCDC69;CCDC69	-0.606288	0.328826		6.44725	6.77683	6.24618	5.80573	-0.483034
ENSG00000235513	L3MBTL2-AS1;	-0.605998	0.297662		6.84088	6.63621	6.34874	5.95179	-0.526277
ENSG00000227063	RPL41P1;	-0.605911	0.631863		5.07272	4.68034	4.43145	4.33464	-0.199377
ENSG00000165695	AK8;AK8	-0.605892	0.50266		5.63291	5.56317	5.13587	4.96558	-0.298726
ENSG00000169902	TPST1;TPST1	-0.605297	0.191352		7.2505	7.26874	6.6763	6.67121	-0.718167
ENSG00000101199	ARFGAP1;ARFGAP1	-0.605177	0.0192855		10.5122	10.4265	10.0458	9.66231	-1.71477
ENSG00000117984	CTSD;HEL-S-130P	-0.604882	0.0113897		12.1467	12.3165	11.8026	11.4332	-1.94349
ENSG00000254986	DPP3;DPP3	-0.604207	0.0325227		9.2218	9.24343	8.7477	8.5084	-1.48781
ENSG00000155827	RNF20;RNF20	-0.603762	0.0949821		8.43056	8.58248	7.64205	8.14168	-1.02236
ENSG00000198189	HSD17B11;HSD17B11	-0.60361	0.0918977		8.56697	9.07318	8.04258	8.42151	-1.0367
ENSG00000225518	LINC01703;	-0.603566	0.524643		5.81929	5.44167	5.40432	4.70802	-0.280136
ENSG00000131732	ZCCHC9;ZCCHC9	-0.60345	0.17993		7.39437	7.31561	6.73158	6.80904	-0.744896
ENSG00000149531	FRG1BP;	-0.603217	0.250409		7.37468	7.20793	7.02501	6.30242	-0.60135
ENSG00000272667	;	-0.603018	0.440677		5.90417	6.2097	5.76382	5.18405	-0.355879
ENSG00000170190	SLC16A5;SLC16A5	-0.602911	0.0155282		10.5412	10.4064	10.0139	9.72025	-1.80888
ENSG00000167799	NUDT8;NUDT8	-0.602881	0.233042		7.07856	7.02262	6.34874	6.58427	-0.632566
ENSG00000244398	;	-0.602752	0.0395108		11.0574	11.7014	10.7247	10.8964	-1.40328
ENSG00000244491	;	-0.602246	0.559805		5.59936	5.05649	4.76396	4.88473	-0.251963
ENSG00000247516	MIR4458HG;	-0.602064	0.67511		4.47566	4.75024	4.32045	3.91347	-0.170626
ENSG00000125246	CLYBL;CLYBL	-0.601968	0.314103		6.42827	6.88955	6.11927	6.08442	-0.502928
ENSG00000205352	PRR13;PRR13	-0.601129	0.0282642		9.72405	10.0966	9.38876	9.25518	-1.54876
ENSG00000249915	PDCD6;PDCD6	-0.601113	0.47339		6.06027	5.56317	5.32027	5.25009	-0.324781
ENSG00000167566	NCKAP5L;	-0.601057	0.112903		8.82093	8.40423	8.27616	7.7435	-0.947295
ENSG00000117450	PRDX1;PRDX1	-0.600666	0.00822855		12.9734	13.3044	12.4769	12.6157	-2.08468
ENSG00000173163	COMMD1;COMMD1	-0.600553	0.108902		7.98744	8.23169	7.65354	7.38044	-0.962966
ENSG00000259877	;	-0.600551	0.569955		5.63291	4.94167	4.76396	4.84254	-0.244159
ENSG00000006118	TMEM132A;TMEM132A	-0.600235	0.0233828		11.5602	11.344	11.0734	10.6022	-1.6311
ENSG00000084444	FAM234B;FAM234B	-0.599732	0.107103		7.92787	8.12391	7.36277	7.51412	-0.970197
ENSG00000135587	SMPD2;SMPD2	-0.599416	0.0576023		8.64714	8.65261	8.15198	7.95628	-1.23956
ENSG00000174586	ZNF497;ZNF497	-0.599365	0.316535		6.44725	6.80994	6.03389	6.10241	-0.499579
ENSG00000131174	COX7B;COX7B	-0.598582	0.0205324		10.539	10.9352	10.0782	10.225	-1.68756
ENSG00000083544	TDRD3;TDRD3	-0.598347	0.479603		5.87643	6.05256	4.9244	5.7836	-0.319118
ENSG00000104870	FCGRT;FCGRT	-0.598328	0.0232023		9.44123	9.60118	8.94537	8.91184	-1.63447
ENSG00000237298	TTN-AS1;	-0.598206	0.385156		6.10876	6.43866	5.60711	5.82752	-0.414363
ENSG00000107331	ABCA2;ABCA2	-0.597926	0.119291		9.76812	9.55554	9.45923	8.53844	-0.923391
ENSG00000149273	RPS3;RPS3	-0.597598	0.00338403		15.1476	15.3234	14.7002	14.5785	-2.47057
ENSG00000142541	RPL13A;RPL13A	-0.597539	0.00659382		16.518	16.8419	16.1424	16.0388	-2.18086
ENSG00000203709	MIR29B2CHG;	-0.597061	0.683915		4.3196	4.81691	3.92464	4.27244	-0.164998
ENSG00000134824	FADS2;FADS2	-0.596973	0.0117127		12.165	11.9537	11.6173	11.2992	-1.93134
ENSG00000277258	PCGF2;PCGF2	-0.59691	0.0799557		9.84169	9.35701	9.26869	8.73575	-1.09715
ENSG00000164404	GDF9;GDF9	-0.596804	0.0132709		10.1677	10.1396	9.63624	9.47824	-1.8771
ENSG00000157833	GAREM2;GAREM2	-0.596552	0.115967		8.21491	8.40423	7.95238	7.45234	-0.935666
ENSG00000165410	CFL2;CFL2	-0.596487	0.0153043		10.3961	10.5998	9.79388	10.012	-1.81519
ENSG00000240207	;	-0.596446	0.663498		4.39974	5.05649	4.13608	4.39427	-0.178161
ENSG00000147604	RPL7;RPL7	-0.596401	0.00834055		14.2348	14.6019	13.8192	13.848	-2.07881
ENSG00000140807	NKD1;NKD1	-0.596255	0.66318		4.54778	4.88064	4.32045	4.13937	-0.178369
ENSG00000286031	;	-0.595806	0.671957		4.23474	5.30898	3.92464	4.70802	-0.172659
ENSG00000111640	GAPDH;HEL-S-162eP	-0.595792	0.00177981		16.2922	16.2985	15.6936	15.7056	-2.74963
ENSG00000153406	NMRAL1;HSCARG	-0.595773	0.0284855		9.59169	9.7365	9.20371	8.92958	-1.54538
ENSG00000135452	TSPAN31;TSPAN31	-0.595685	0.00659382		11.3193	11.5138	10.8399	10.8101	-2.18086
ENSG00000280355	;	-0.595677	0.687212		5.16734	3.95015	4.20019	4.20744	-0.162909
ENSG00000223496	EXOSC6;EXOSC6	-0.595647	0.0298825		9.69456	9.51596	9.13772	8.88351	-1.52458
ENSG00000187446	CHP1;CHP	-0.595494	0.0041017		11.6848	11.6314	11.0491	11.0784	-2.38704
ENSG00000184588	PDE4B;PDE4B	-0.595267	0.0852164		8.18129	8.29738	7.64205	7.66699	-1.06948
ENSG00000165502	RPL36AL;RPL36AL	-0.595074	0.00740044		10.9886	11.1637	10.4836	10.4862	-2.13074
ENSG00000118162	KPTN;KPTN	-0.595055	0.104802		7.96786	8.18197	7.54045	7.4453	-0.97963
ENSG00000189431	RASSF10;RASSF10	-0.594977	0.198796		7.66146	7.20793	6.82604	6.92477	-0.701593
ENSG00000272114	;	-0.594827	0.312696		6.97773	6.48039	6.24618	6.12018	-0.504877
ENSG00000169710	FASN;FASN	-0.5946	0.448141		11.9949	11.8971	11.7779	10.7479	-0.348585
ENSG00000105254	TBCB;TBCB	-0.594528	0.0050587		11.6863	11.7042	11.1736	11.0258	-2.29596
ENSG00000089327	FXYD5;FXYD5	-0.594507	0.0297957		10.2266	9.9778	9.67764	9.33343	-1.52585
ENSG00000286757	;	-0.594474	0.510473		5.49377	5.77921	5.23101	4.96558	-0.292027
ENSG00000171311	EXOSC1;EXOSC1	-0.594211	0.0348116		9.05239	9.09685	8.48038	8.49143	-1.45828
ENSG00000033011	ALG1;ALG1	-0.594186	0.0197546		10.189	10.4158	9.83105	9.58765	-1.70433
ENSG00000183011	NAA38;NAA38	-0.594172	0.0164201		9.80905	9.9221	9.28357	9.2672	-1.78463
ENSG00000122861	PLAU;PLAU	-0.593956	0.00424632		12.2157	12.3147	11.7329	11.6098	-2.37199
ENSG00000105048	TNNT1;TNNT1	-0.59382	0.0119389		10.834	10.8159	10.361	10.0918	-1.92304
ENSG00000042429	MED17;MED17	-0.593747	0.635121		5.02298	5.05649	3.99861	4.92572	-0.197144
ENSG00000204899	MZT1;MZT1	-0.59358	0.215846		7.11463	7.24472	6.65358	6.55844	-0.665857
ENSG00000029639	TFB1M;TFB1M	-0.59355	0.249654		6.97773	7.00842	6.32017	6.5188	-0.602661
ENSG00000114405	C3orf14;C3orf14	-0.593378	0.376115		6.10876	6.82622	5.96175	5.93181	-0.424679
ENSG00000235173	HGH1;HGH1	-0.593024	0.379978		6.59073	6.35138	5.55902	6.20588	-0.420241
ENSG00000115661	STK16;STK16	-0.59281	0.0390176		9.22455	9.42805	8.85864	8.61249	-1.40874
ENSG00000246731	;	-0.592412	0.516611		5.29855	6.32872	5.55902	5.11484	-0.286837
ENSG00000101986	ABCD1;ABCD1	-0.592321	0.348591		7.14982	6.75998	6.79523	5.84899	-0.457684
ENSG00000112167	SAYSD1;SAYSD1	-0.591753	0.337007		6.42827	6.63621	6.03389	5.91155	-0.472361
ENSG00000171552	BCL2L1;BCL2L1	-0.591662	0.00649966		11.911	11.9889	11.4633	11.2476	-2.18711
ENSG00000128242	GAL3ST1;GAL3ST1	-0.5916	0.0752126		8.45889	8.62497	7.83613	8.07492	-1.12371
ENSG00000123144	TRIR;TRIR	-0.591456	0.0196069		10.8021	10.7081	10.3416	9.96603	-1.70759
ENSG00000125388	GRK4;GRK4	-0.591267	0.626723		5.02298	5.16285	4.96186	4.06793	-0.202925
ENSG00000065054	SLC9A3R2;SLC9A3R2	-0.590917	0.0115429		10.4059	10.517	9.93362	9.81057	-1.93769
ENSG00000256294	ZNF225;ZNF225	-0.590911	0.549032		5.33977	5.5238	4.76396	5.04214	-0.260402
ENSG00000139637	C12orf10;C12orf10	-0.590835	0.0155934		10.2128	10.3441	9.78345	9.59243	-1.80706
ENSG00000248980	;	-0.59061	0.199381		7.50721	7.24472	6.70972	6.90441	-0.700315
ENSG00000111412	C12orf49;C12orf49	-0.590581	0.0181498		9.7376	9.73866	9.13362	9.16819	-1.74113
ENSG00000106004	HOXA5;HOXA5	-0.590573	0.410508		5.98433	6.72569	5.63057	6.02907	-0.386678
ENSG00000107185	RGP1;RGP1	-0.590525	0.0290115		9.76245	9.50589	9.11295	8.99122	-1.53743
ENSG00000164366	CCDC127;CCDC127	-0.59024	0.135927		7.73282	7.84916	7.26873	7.15767	-0.866694
ENSG00000134248	LAMTOR5;LAMTOR5	-0.590004	0.0168167		9.8701	9.9202	9.35747	9.25719	-1.77426
ENSG00000236782	;	-0.589777	0.05299		9.0678	9.3542	8.77164	8.47772	-1.27581
ENSG00000169504	CLIC4;CLIC4	-0.58975	0.0926265		9.52848	9.79762	8.67342	9.40221	-1.03326
ENSG00000281376	ABALON;	-0.58969	0.0107594		10.7761	10.8006	10.3019	10.0907	-1.96821
ENSG00000240137	ERICH6-AS1;	-0.589669	0.622753		5.02298	5.16285	4.9244	4.13937	-0.205684
ENSG00000140682	TGFB1I1;TGFB1I1	-0.589641	0.0774623		8.44006	8.69311	8.08564	7.88532	-1.11091
ENSG00000280734	LINC01232;	-0.589547	0.630196		5.07272	5.21322	3.99861	5.07895	-0.200524
ENSG00000172339	ALG14;ALG14	-0.589459	0.285294		6.72122	6.88955	6.21548	6.27095	-0.544707
ENSG00000136717	BIN1;BIN1	-0.58905	0.0333076		9.55059	9.42538	9.02718	8.76992	-1.47746
ENSG00000233954	UQCRHL;UQCRHL	-0.588983	0.325547		6.97773	6.77683	6.6305	5.91155	-0.487387
ENSG00000130700	GATA5;GATA5	-0.588327	0.629384		5.49377	4.60687	4.84641	4.33464	-0.201084
ENSG00000167770	OTUB1;OTUB1	-0.588206	0.0129505		10.4536	10.6669	10.0094	9.94499	-1.88772
ENSG00000108448	TRIM16L;TRIM16L	-0.588046	0.00855567		12.9804	13.2964	12.5158	12.6014	-2.06775
ENSG00000287765	;	-0.588037	0.0292044		9.70249	9.90879	9.34512	9.09145	-1.53455
ENSG00000116199	FAM20B;FAM20B	-0.587979	0.027269		9.45302	9.3626	8.84366	8.80604	-1.56433
ENSG00000178814	OPLAH;OPLAH	-0.587782	0.0955006		9.00193	8.82043	8.59511	8.00969	-1.01999
ENSG00000080854	IGSF9B;IGSF9B	-0.587777	0.675083		5.37984	4.06433	4.53452	4.20744	-0.170643
ENSG00000157514	TSC22D3;TSC22D3	-0.58774	0.0345684		9.18834	9.172	8.64779	8.54504	-1.46132
ENSG00000251580	LINC02482;	-0.587698	0.579589		5.1208	5.5238	5.06876	4.50661	-0.23688
ENSG00000287315	;	-0.587463	0.667364		5.07272	4.75024	4.88593	3.74046	-0.175637
ENSG00000239789	MRPS17;MRPS17	-0.587103	0.302501		6.59073	6.95021	6.21548	6.22242	-0.519273
ENSG00000013503	POLR3B;POLR3B	-0.586874	0.293723		6.99072	7.10497	6.1026	6.78696	-0.532062
ENSG00000188766	SPRED3;SPRED3	-0.586529	0.484739		6.20112	5.67523	5.69873	5.07895	-0.314492
ENSG00000147155	EBP;EBP	-0.586453	0.128925		7.90746	8.36578	7.63046	7.52082	-0.889661
ENSG00000138036	DYNC2LI1;DYNC2LI1	-0.586445	0.305348		6.62448	6.82622	6.23091	6.10241	-0.515205
ENSG00000013288	MAN2B2;MAN2B2	-0.586442	0.153169		8.0195	7.66235	7.39051	7.15767	-0.814829
ENSG00000095739	BAMBI;BAMBI	-0.585624	0.0408899		9.23551	9.20349	8.50914	8.75862	-1.38838
ENSG00000105255	FSD1;FSD1	-0.585604	0.0809151		8.42099	8.4782	7.98003	7.75492	-1.09197
ENSG00000271646	;	-0.585544	0.667581		4.68204	4.75024	4.20019	4.27244	-0.175496
ENSG00000198246	SLC29A3;SLC29A3	-0.584645	0.0792277		8.71919	8.50877	8.1681	7.90083	-1.10112
ENSG00000266036	;	-0.5845	0.241698		7.0036	7.51953	6.6305	6.79804	-0.616726
ENSG00000104129	DNAJC17;DNAJC17	-0.58431	0.129829		7.88675	8.32628	7.52176	7.57336	-0.886628
ENSG00000123415	SMUG1;SMUG1	-0.584233	0.0464144		8.90572	8.9449	8.39392	8.29815	-1.33335
ENSG00000175787	ZNF169;ZNF169	-0.584145	0.597746		5.41882	4.94167	4.58342	4.79908	-0.223483
ENSG00000171159	C9orf16;C9orf16	-0.584063	0.0324271		9.32032	9.53836	8.84617	8.85991	-1.48909
ENSG00000115919	KYNU;KYNU	-0.583877	0.0794407		10.5783	11.047	9.8808	10.5425	-1.09996
ENSG00000164587	RPS14;RPS14	-0.583704	0.00977405		14.4895	14.8468	14.0651	14.1253	-2.00993
ENSG00000186815	TPCN1;TPCN1	-0.583661	0.0158306		10.628	10.5406	10.1254	9.86953	-1.8005
ENSG00000139625	MAP3K12;MAP3K12	-0.583563	0.0754527		9.01471	8.70196	8.43113	8.13295	-1.12233
ENSG00000172893	DHCR7;DHCR7	-0.583559	0.0165158		11.4568	11.3713	11.0049	10.6358	-1.7821
ENSG00000230733	;	-0.583558	0.251484		7.96786	7.53941	7.56501	6.70692	-0.59949
ENSG00000100889	PCK2;PCK2	-0.583314	0.0220571		10.8723	10.8098	10.4436	10.0484	-1.65645
ENSG00000229638	RPL4P4;	-0.583233	0.129573		7.85867	7.865	7.26124	7.32022	-0.887485
ENSG00000132535	DLG4;DLG4	-0.583192	0.149048		8.49126	7.93421	7.81581	7.50061	-0.826674
ENSG00000090238	YPEL3;YPEL3	-0.583115	0.216653		7.47057	7.24472	6.96169	6.60965	-0.664235
ENSG00000172081	MOB3A;MOB3A	-0.582745	0.103841		8.5539	8.40423	8.11088	7.66699	-0.983632
ENSG00000010295	IFFO1;IFFO1	-0.582024	0.519976		5.63291	5.6015	5.034	5.14986	-0.284016
ENSG00000233830	EIF4HP1;	-0.582009	0.42986		6.13241	6.05256	5.45775	5.64319	-0.366672
ENSG00000118894	EEF2KMT;EEF2KMT	-0.581896	0.0323499		9.53293	9.50336	9.05562	8.81425	-1.49013
ENSG00000122512	PMS2;PMS2	-0.581878	0.0823849		8.47748	8.50877	8.04258	7.78308	-1.08415
ENSG00000245848	CEBPA;CEBPA	-0.581691	0.0831654		8.70743	9.06292	8.48038	8.13732	-1.08006
ENSG00000155254	MARVELD1;MARVELD1	-0.581194	0.0294153		10.4688	10.3142	9.9959	9.60668	-1.53143
ENSG00000233913	RPL10P9;	-0.581065	0.016937		10.3028	10.5406	9.8869	9.80646	-1.77116
ENSG00000184216	IRAK1;IRAK1	-0.581012	0.0230545		12.7142	12.5875	12.2953	11.8068	-1.63725
ENSG00000265148	TSPOAP1-AS1;	-0.580971	0.0366018		9.51954	9.87006	9.16408	9.0892	-1.4365
ENSG00000164300	SERINC5;SERINC5	-0.580919	0.0346256		9.26255	9.36539	8.67342	8.80054	-1.4606
ENSG00000132763	MMACHC;MMACHC	-0.580819	0.0153664		11.7843	12.1616	11.3619	11.4469	-1.81343
ENSG00000161921	CXCL16;CXCL16	-0.580568	0.112367		8.95628	8.70196	8.53111	7.9263	-0.949362
ENSG00000248932	;	-0.580378	0.476634		6.20112	5.63884	5.50928	5.31324	-0.321815
ENSG00000162408	NOL9;NOL9	-0.580325	0.168526		7.7785	7.6163	6.9709	7.28127	-0.773333
ENSG00000085871	MGST2;MGST2	-0.580131	0.0747151		8.51844	8.74539	7.98459	8.13732	-1.12659
ENSG00000257545	;	-0.579974	0.681732		4.68204	4.60687	3.99861	4.33464	-0.166387
ENSG00000109794	FAM149A;FAM149A	-0.579734	0.639366		5.02298	4.88064	4.63072	4.27244	-0.194251
ENSG00000224066	;	-0.579573	0.661784		5.21241	4.75024	3.84666	4.96558	-0.179284
ENSG00000163357	DCST1;DCST1	-0.579154	0.647492		4.91804	4.81691	4.43145	4.33464	-0.188766
ENSG00000171450	CDK5R2;CDK5R2	-0.579028	0.64748		4.74475	5.11065	4.13608	4.70802	-0.188774
ENSG00000126391	FRMD8;FRMD8	-0.578961	0.0525329		9.25987	9.39296	8.92654	8.55487	-1.27957
ENSG00000113083	LOX;LOX	-0.578654	0.667689		4.80486	4.68034	4.20019	4.33464	-0.175426
ENSG00000117906	RCN2;RCN2	-0.578397	0.0309887		9.84169	10.1525	9.33979	9.51396	-1.5088
ENSG00000177954	RPS27;RPS27	-0.578335	0.00376597		14.1792	14.3098	13.6394	13.6956	-2.42412
ENSG00000006015	REX1BD;REX1BD	-0.57823	0.0537901		9.05549	9.17835	8.68467	8.3889	-1.2693
ENSG00000114383	TUSC2;TUSC2	-0.578024	0.0603461		8.96289	9.172	8.63914	8.34045	-1.21935
ENSG00000148225	WDR31;WDR31	-0.577803	0.404898		6.57356	6.2343	6.13576	5.54137	-0.392654
ENSG00000249035	CLMAT3;	-0.577788	0.720666		5.16734	3.82616	3.58373	4.61083	-0.142266
ENSG00000285184	;	-0.57777	0.533954		5.69775	5.44167	4.99838	5.11484	-0.272496
ENSG00000140105	WARS1;WARS	-0.57769	0.00529912		11.9025	11.9812	11.3433	11.3871	-2.2758
ENSG00000103254	ANTKMT;ANTKMT	-0.577454	0.0574436		10.0266	10.3596	9.85614	9.35422	-1.24076
ENSG00000090776	EFNB1;EFNB1	-0.577269	0.174877		8.27458	7.71575	7.607	7.28914	-0.757267
ENSG00000234155	LINC02535;	-0.577118	0.690132		4.61647	4.68034	3.76423	4.50661	-0.161068
ENSG00000170903	MSANTD4;MSANTD4	-0.576722	0.387697		6.88332	6.97961	5.69873	6.84154	-0.411508
ENSG00000214293	APTR;	-0.576607	0.22063		7.21772	7.57837	6.69866	6.98419	-0.656336
ENSG00000122026	RPL21;RPL21	-0.576454	0.046965		13.0463	13.7063	12.7286	12.9386	-1.32823
ENSG00000168398	BDKRB2;BDKRB2	-0.57642	0.0928931		8.23143	8.32054	7.71518	7.70281	-1.03202
ENSG00000135093	USP30;USP30	-0.576336	0.245268		7.2505	7.29236	6.93367	6.45022	-0.610359
ENSG00000181035	SLC25A42;SLC25A42	-0.576068	0.591353		5.21241	5.2619	4.84641	4.61083	-0.228153
ENSG00000184205	TSPYL2;TSPYL2	-0.575936	0.338802		7.13818	6.54081	6.5218	6.08442	-0.470054
ENSG00000010704	HFE;HFE	-0.575804	0.101916		8.26925	8.20082	7.75841	7.57336	-0.991756
ENSG00000186468	RPS23;RPS23	-0.575437	0.0106422		14.0715	14.3805	13.7363	13.5771	-1.97297
ENSG00000204947	ZNF425;ZNF425	-0.575427	0.485363		5.81929	6.07997	5.69873	5.07895	-0.313933
ENSG00000182511	FES;FES	-0.575341	0.404661		6.28791	6.3737	5.53437	6.01013	-0.392909
ENSG00000042753	AP2S1;AP2S1	-0.575186	0.0162447		11.0978	11.3553	10.757	10.5515	-1.78929
ENSG00000170340	B3GNT2;B3GNT2	-0.574853	0.125813		7.99391	8.29738	7.47717	7.69097	-0.900275
ENSG00000163435	ELF3;ELF3	-0.574775	0.00698034		11.4044	11.3693	10.8493	10.7762	-2.15612
ENSG00000124374	PAIP2B;PAIP2B	-0.574698	0.582256		5.21241	5.35458	4.80577	4.75427	-0.234886
ENSG00000239264	TXNDC5;TXNDC5	-0.574454	0.467898		5.69775	6.32872	5.50928	5.51475	-0.329849
ENSG00000119632	IFI27L2;IFI27L2	-0.574222	0.159704		8.49583	8.20082	8.07713	7.43114	-0.796685
ENSG00000078237	TIGAR;TIGAR	-0.574152	0.503895		5.56502	5.96707	5.32027	5.18405	-0.29766
ENSG00000185633	NDUFA4L2;NDUFA4L2	-0.573977	0.300001		6.78229	7.14445	6.60704	6.20588	-0.522878
ENSG00000167701	GPT;GPT	-0.573921	0.709672		5.1208	4.06433	4.63072	3.6455	-0.148942
ENSG00000142684	ZNF593;ZNF593	-0.573787	0.0514636		8.97602	9.21898	8.58013	8.48459	-1.2885
ENSG00000105193	RPS16;RPS16	-0.573779	0.0149505		15.4181	15.8362	15.0963	15.0402	-1.82534
ENSG00000144677	CTDSPL;CTDSPL	-0.573754	0.0788047		8.71919	8.63424	7.95703	8.25055	-1.10345
ENSG00000198081	ZBTB14;ZBTB14	-0.573735	0.324033		6.6077	6.79348	6.06865	6.23878	-0.489411
ENSG00000186523	FAM86B1;FAM86B1	-0.573675	0.492583		6.32943	5.5238	5.55902	5.34381	-0.30752
ENSG00000172183	ISG20;ISG20	-0.573628	0.0587564		8.86395	8.90332	8.41434	8.20964	-1.23094
ENSG00000159346	ADIPOR1;ADIPOR1	-0.57351	0.0143882		10.295	10.2598	9.7288	9.68338	-1.84199
ENSG00000198870	STKLD1;STKLD1	-0.573191	0.640392		5.02298	4.88064	4.43145	4.50661	-0.193554
ENSG00000167107	ACSF2;ACSF2	-0.573186	0.173382		7.948	7.60691	7.35575	7.08715	-0.760995
ENSG00000141873	SLC39A3;SLC39A3	-0.573129	0.119641		8.18695	8.26789	7.83108	7.47322	-0.92212
ENSG00000152348	ATG10;ATG10	-0.573099	0.0107337		13.9669	14.2863	13.6221	13.5002	-1.96925
ENSG00000285864	;	-0.572623	0.60618		5.1208	5.21322	4.58342	4.75427	-0.217398
ENSG00000272899	ATP6V1FNB;ATP6V1FNB	-0.572331	0.644006		5.25613	4.75024	4.80577	4.20744	-0.19111
ENSG00000130881	LRP3;LRP3	-0.572311	0.0465884		10.4757	10.4854	10.157	9.6114	-1.33172
ENSG00000102109	PCSK1N;PCSK1N	-0.572213	0.0421233		10.8941	11.2857	10.7234	10.3107	-1.37548
ENSG00000092531	SNAP23;SNAP23	-0.572082	0.098233		8.63478	8.59203	7.81581	8.25055	-1.00774
ENSG00000240087	RPSAP12;	-0.571847	0.425413		6.08472	6.35138	5.50928	5.84899	-0.371189
ENSG00000096080	MRPS18A;MRPS18A	-0.571811	0.089853		8.95628	8.77084	8.50914	8.05658	-1.04647
ENSG00000138380	CARF;CARF	-0.57176	0.618031		5.02298	5.2619	4.37702	4.88473	-0.20899
ENSG00000164849	GPR146;GPR146	-0.571715	0.568824		5.63291	5.30898	4.63072	5.25009	-0.245022
ENSG00000161395	PGAP3;PGAP3	-0.571277	0.0878119		8.34205	8.3988	7.82092	7.79419	-1.05645
ENSG00000186564	FOXD2;FOXD2	-0.571097	0.529055		5.93139	5.39878	5.23101	5.11484	-0.276499
ENSG00000124508	BTN2A2;BTN2A2	-0.571018	0.204943		7.38456	7.361	6.78482	6.85221	-0.688367
ENSG00000064490	RFXANK;RFXANK	-0.570796	0.0561882		8.96289	8.93743	8.48038	8.28246	-1.25035
ENSG00000129559	NEDD8;NEDD8	-0.569781	0.143154		8.53184	9.2585	8.19981	8.53182	-0.844198
ENSG00000228474	OST4;OST4	-0.569689	0.0226548		10.1919	10.1445	9.47875	9.71442	-1.64484
ENSG00000178252	WDR6;WDR6	-0.569354	0.0160917		10.5066	10.3721	9.92535	9.82011	-1.7934
ENSG00000124257	NEURL2;NEURL2	-0.569035	0.229453		7.14982	7.38317	6.74238	6.69511	-0.639306
ENSG00000139651	ZNF740;ZNF740	-0.568724	0.0297988		9.51055	9.50589	8.95933	8.92706	-1.5258
ENSG00000155876	RRAGA;RRAGA	-0.568523	0.0105062		10.9805	11.1123	10.4576	10.5033	-1.97856
ENSG00000182257	PRR34;	-0.568431	0.433489		6.17858	6.07997	5.55902	5.64319	-0.363022
[truncated: 12,489 more rows]
